# Supplementary material for: Social Media Reveals Gaps Between Climate Action and Public Perception from National to City Scales
Source: Research Square preprint supplement (doi:10.21203/rs.3.rs-7660816/v1), 2025-10-24
Supplement: Supplementary file 1 [file 8e523f5856a5ec4d3988884f.docx]

# Supplementary Information for

**Social Media Reveals Gaps Between Climate Action and Public Perception from National to City Scales**

# Part 1. Supplementary Figures

**
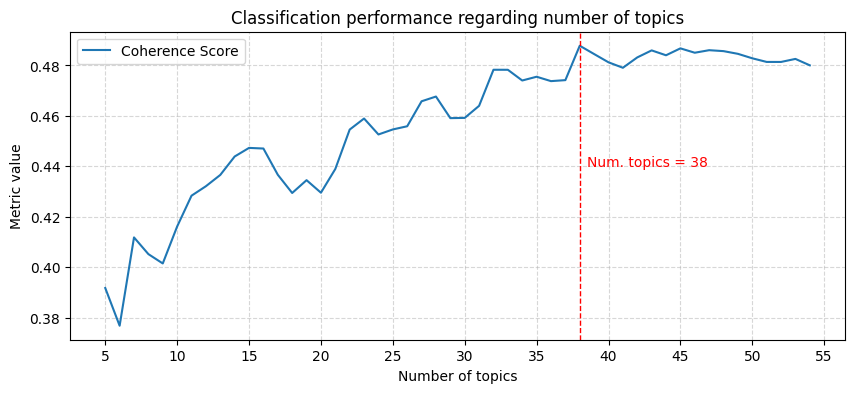
**

**Figure S1.** Coherence score of topic modeling on NDC


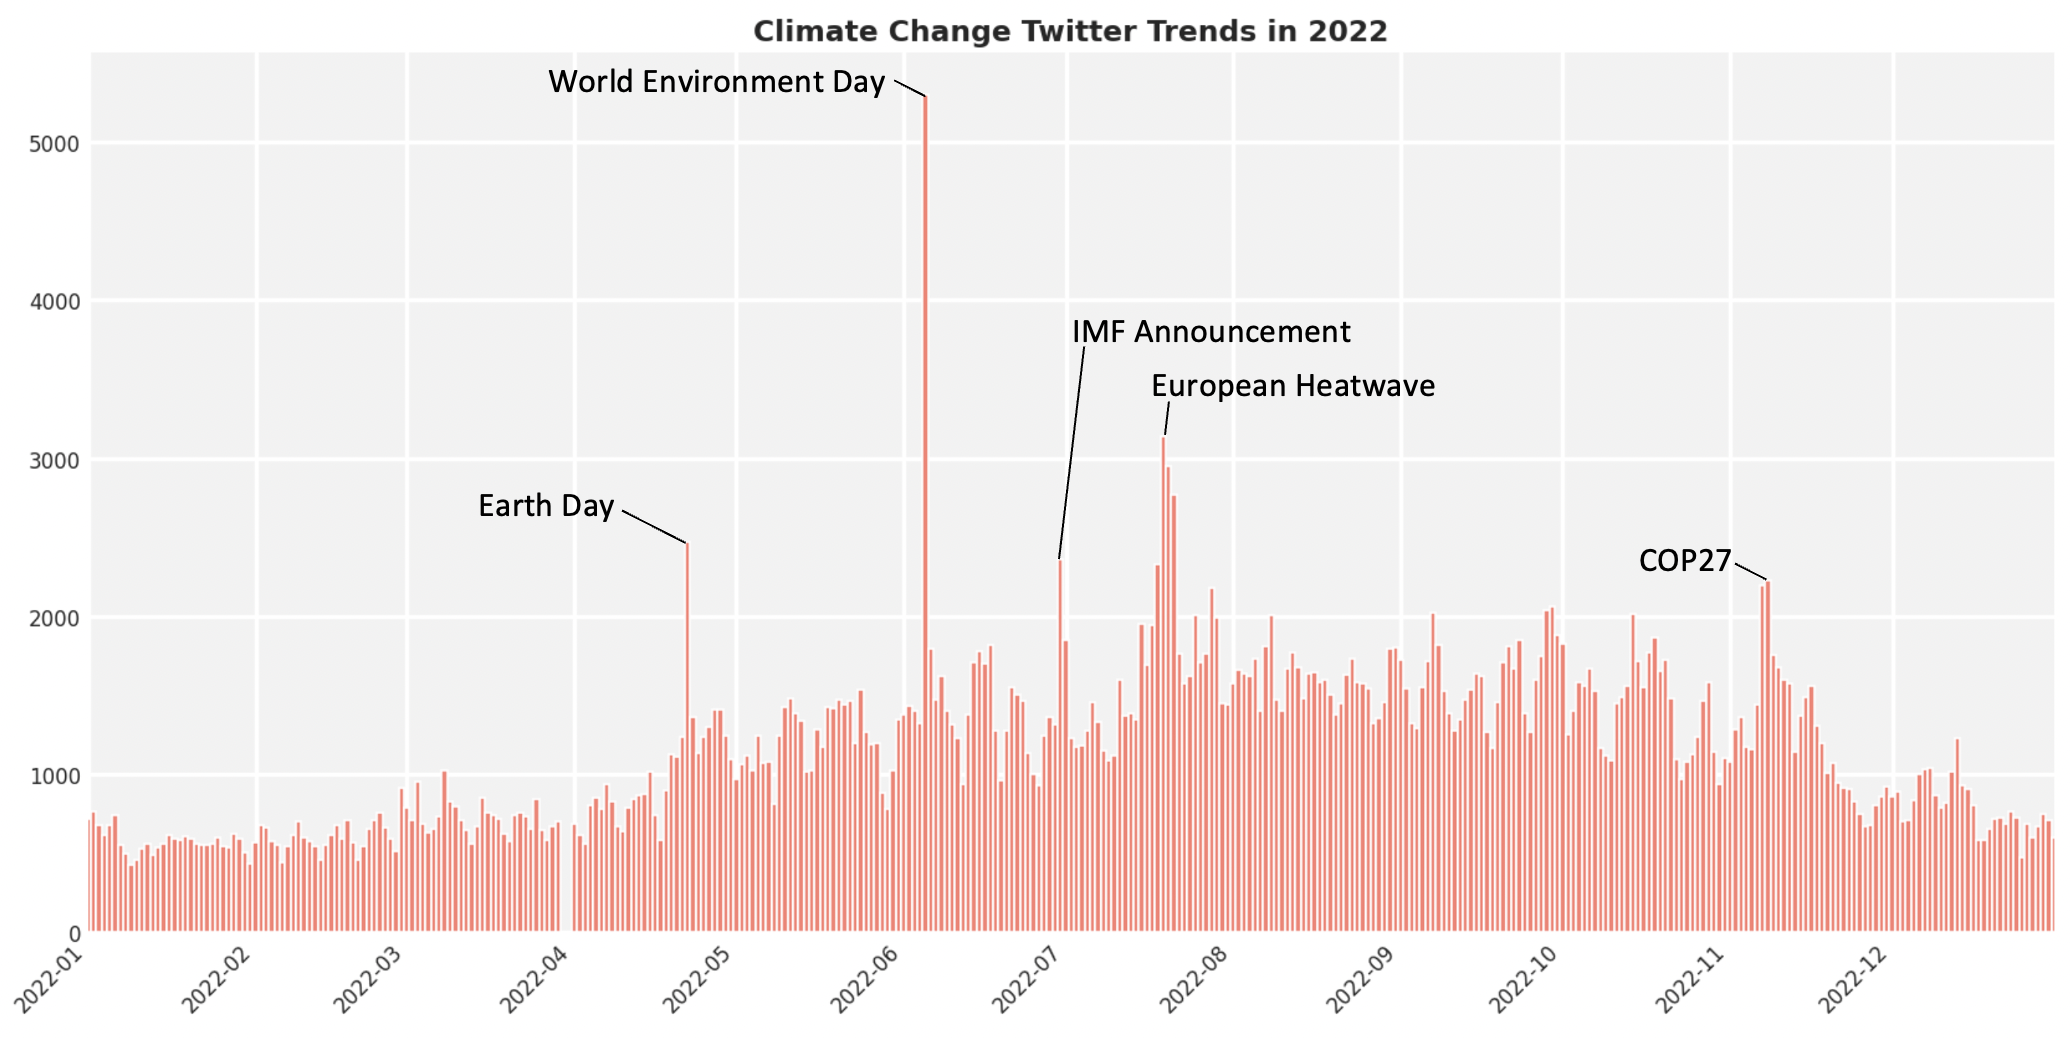


**Figure S2.** Number of climate-related tweets in 2022

| T1: Emission accounting  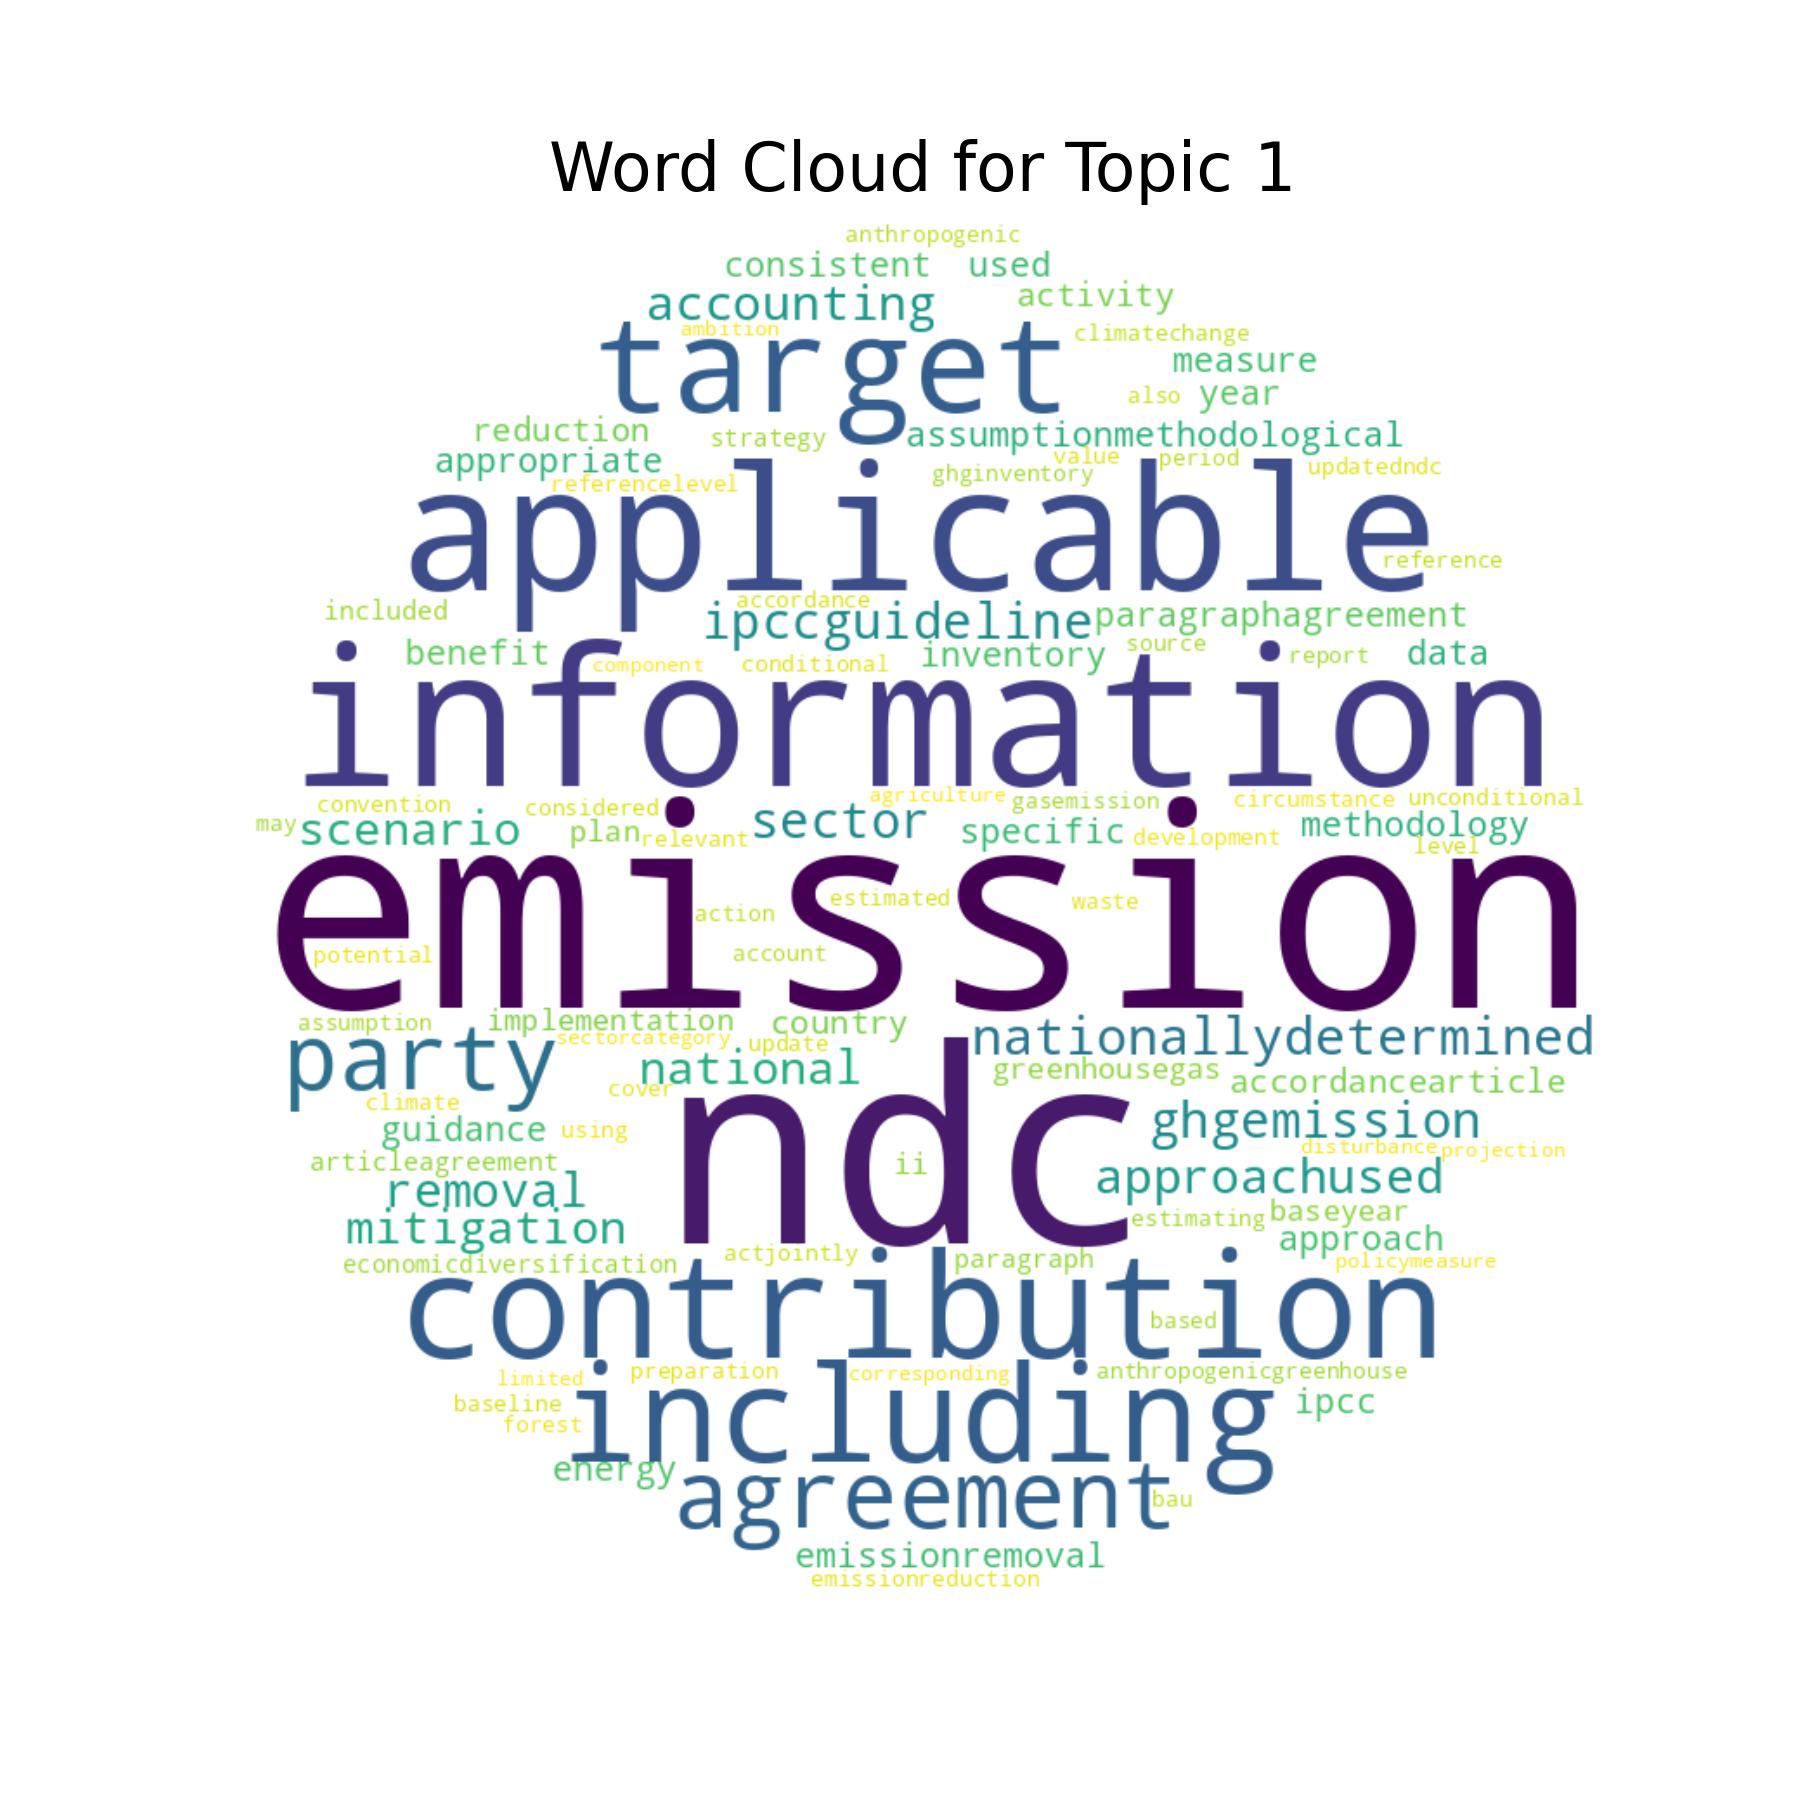 | T2: Renewable energy  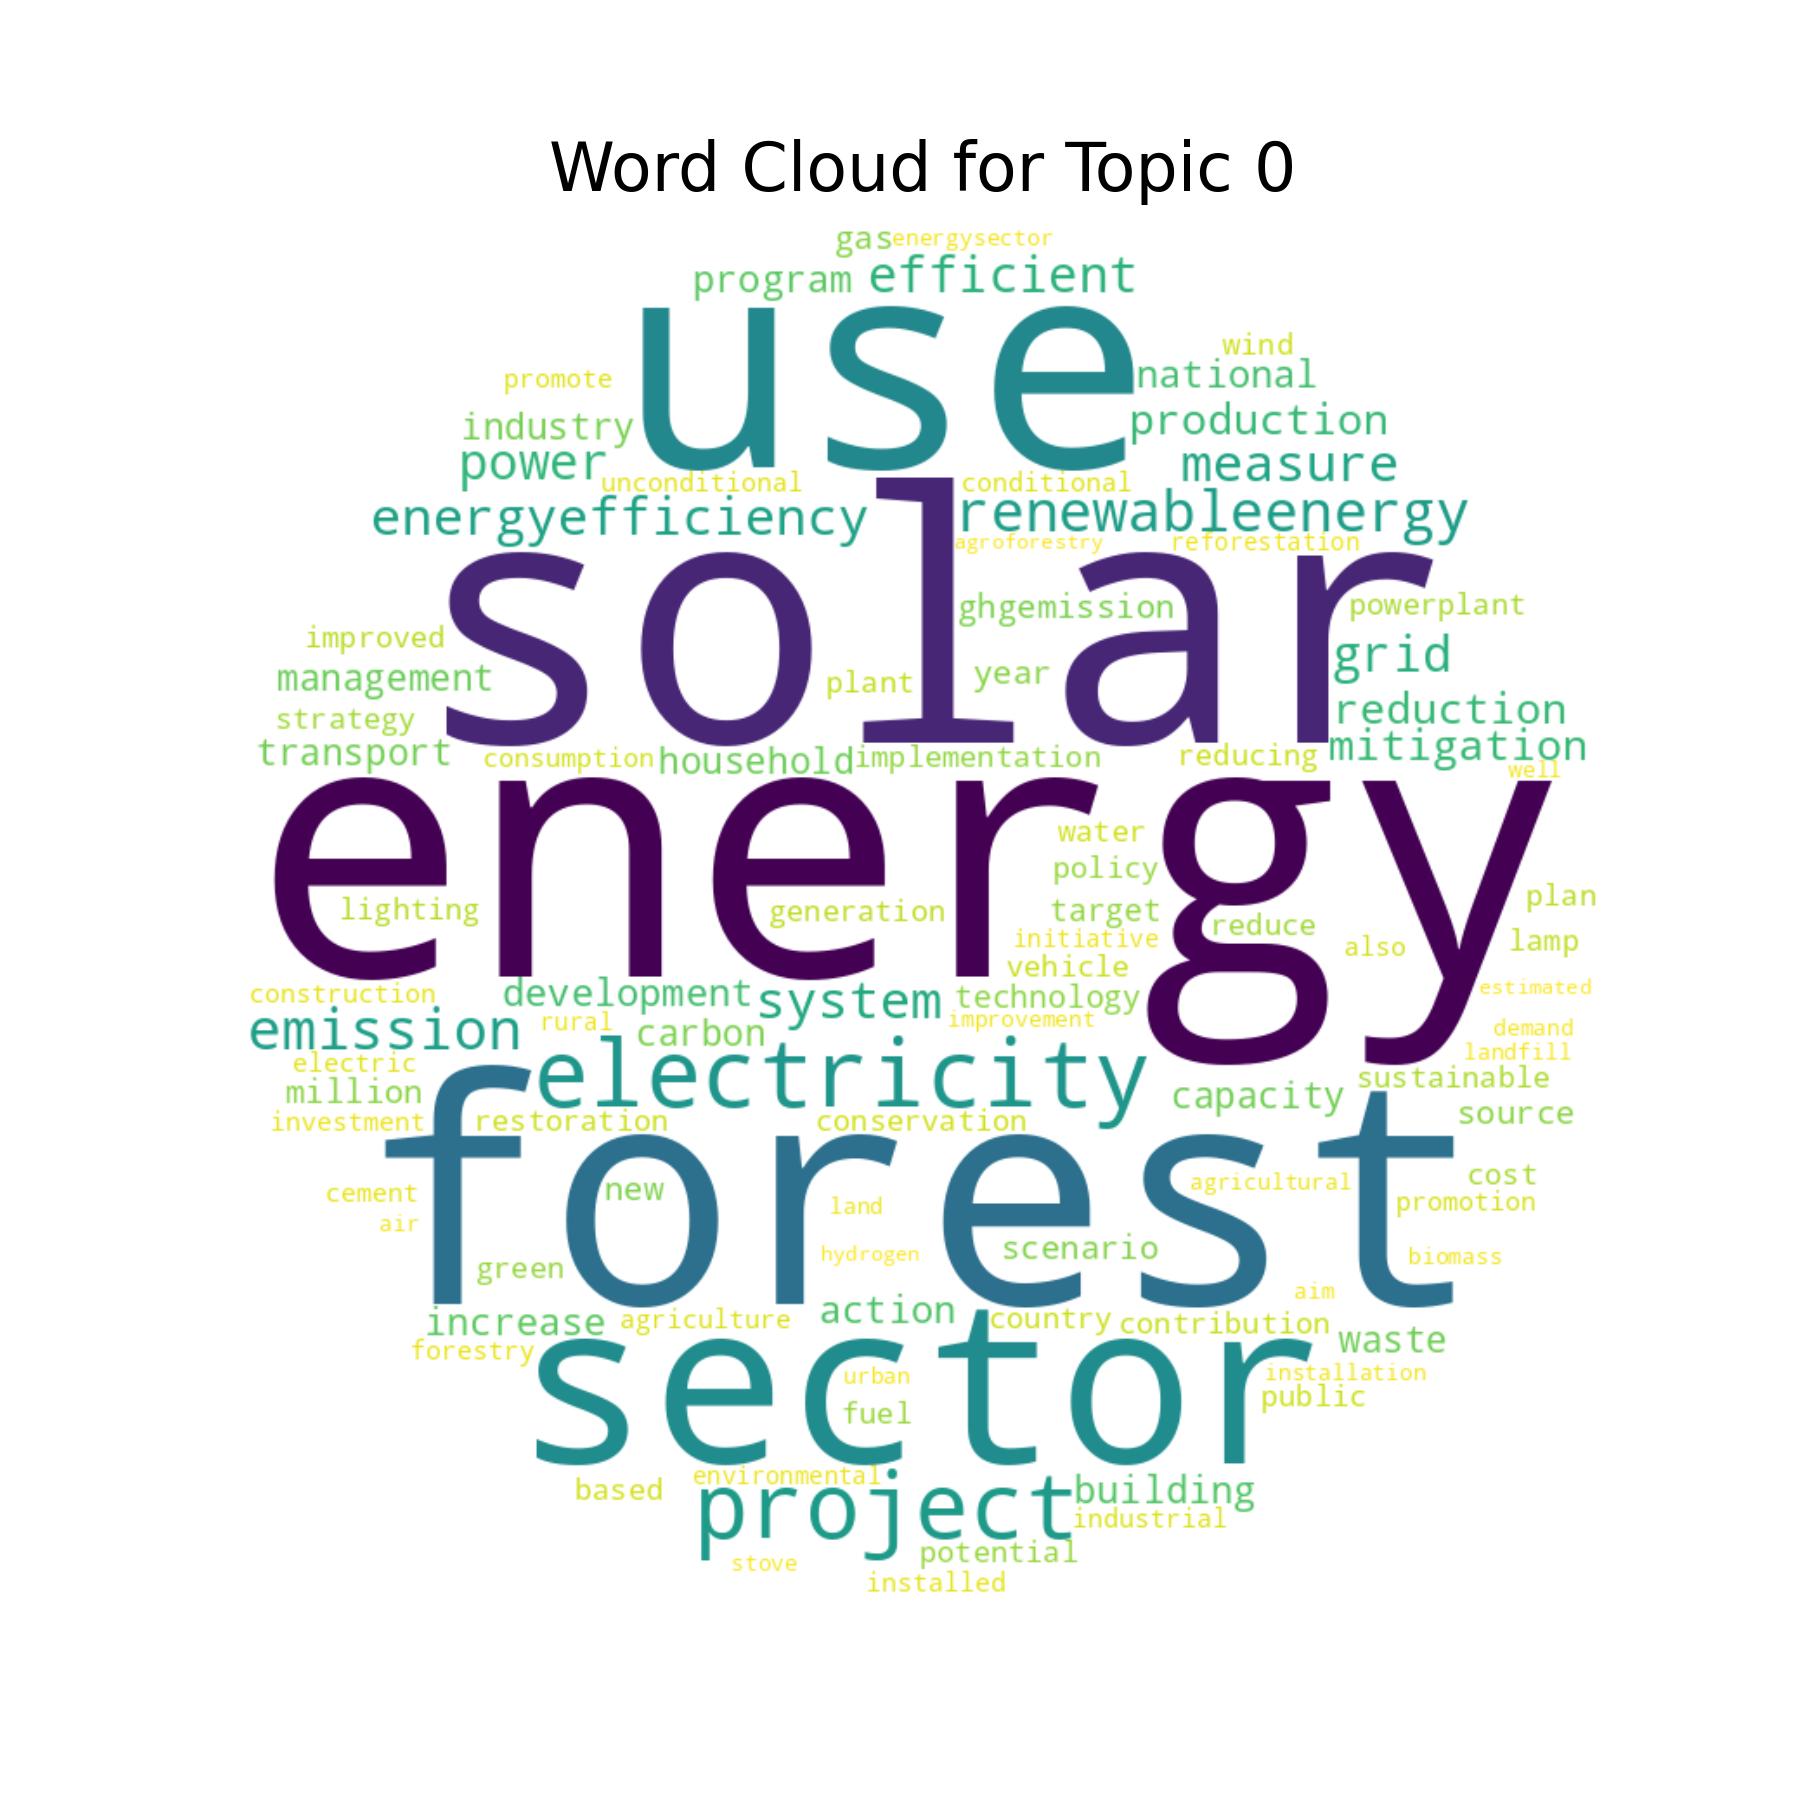 | T3: Resilience strategies  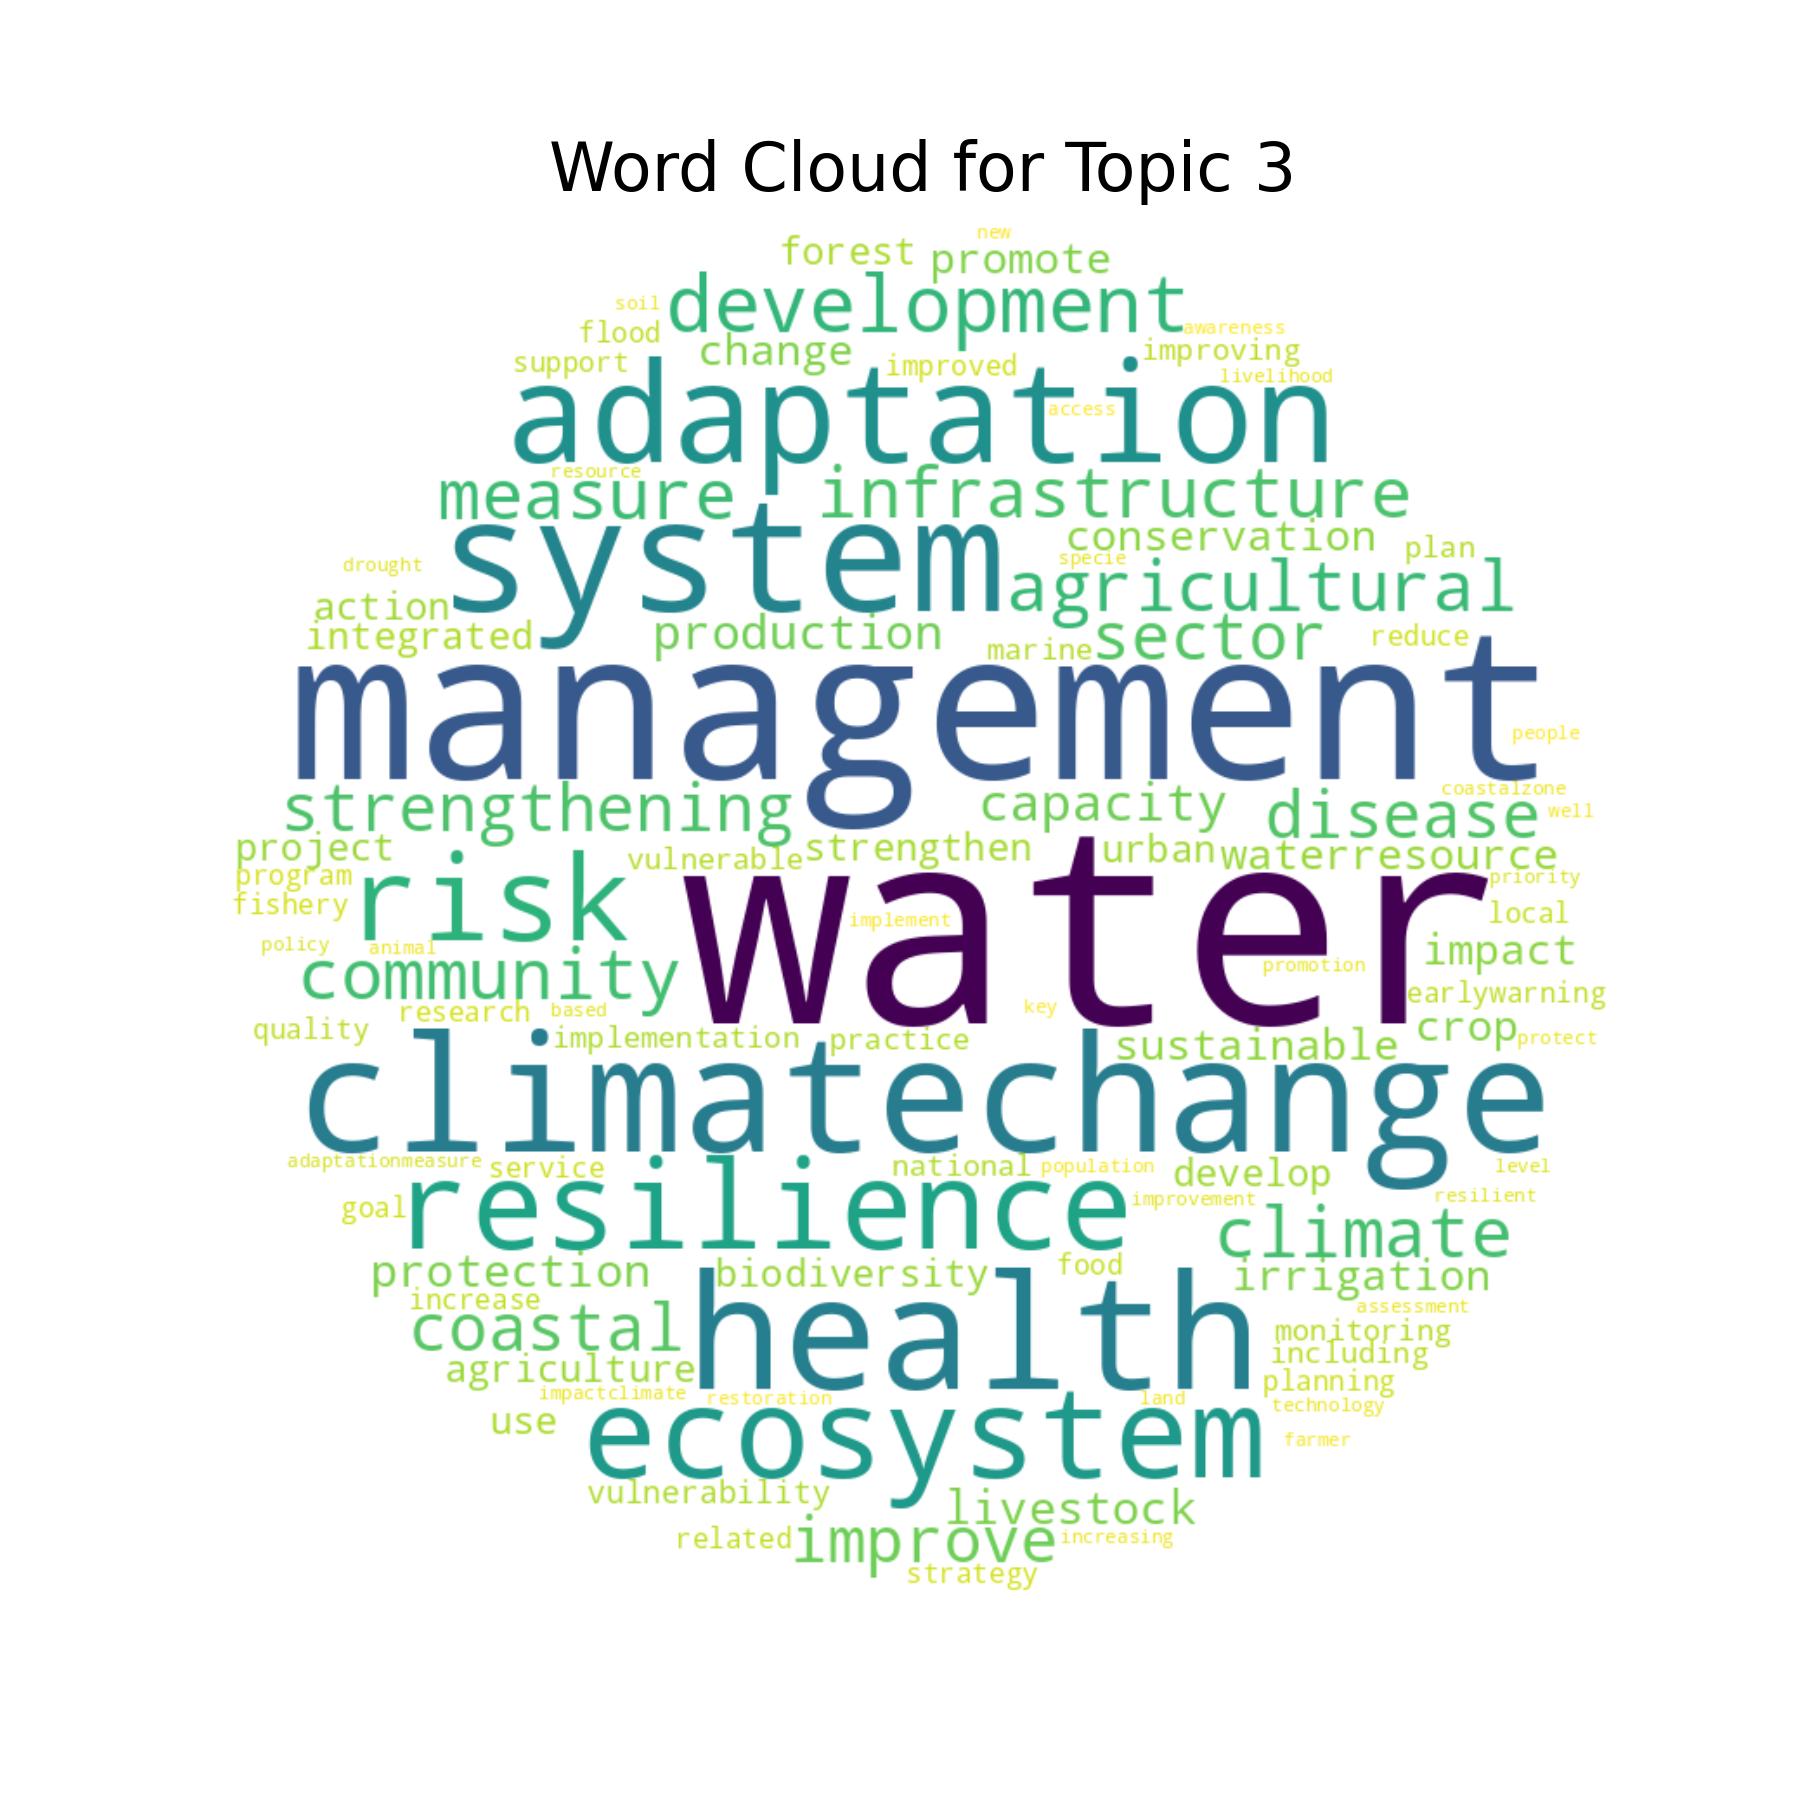 | T4: Adaptation processes  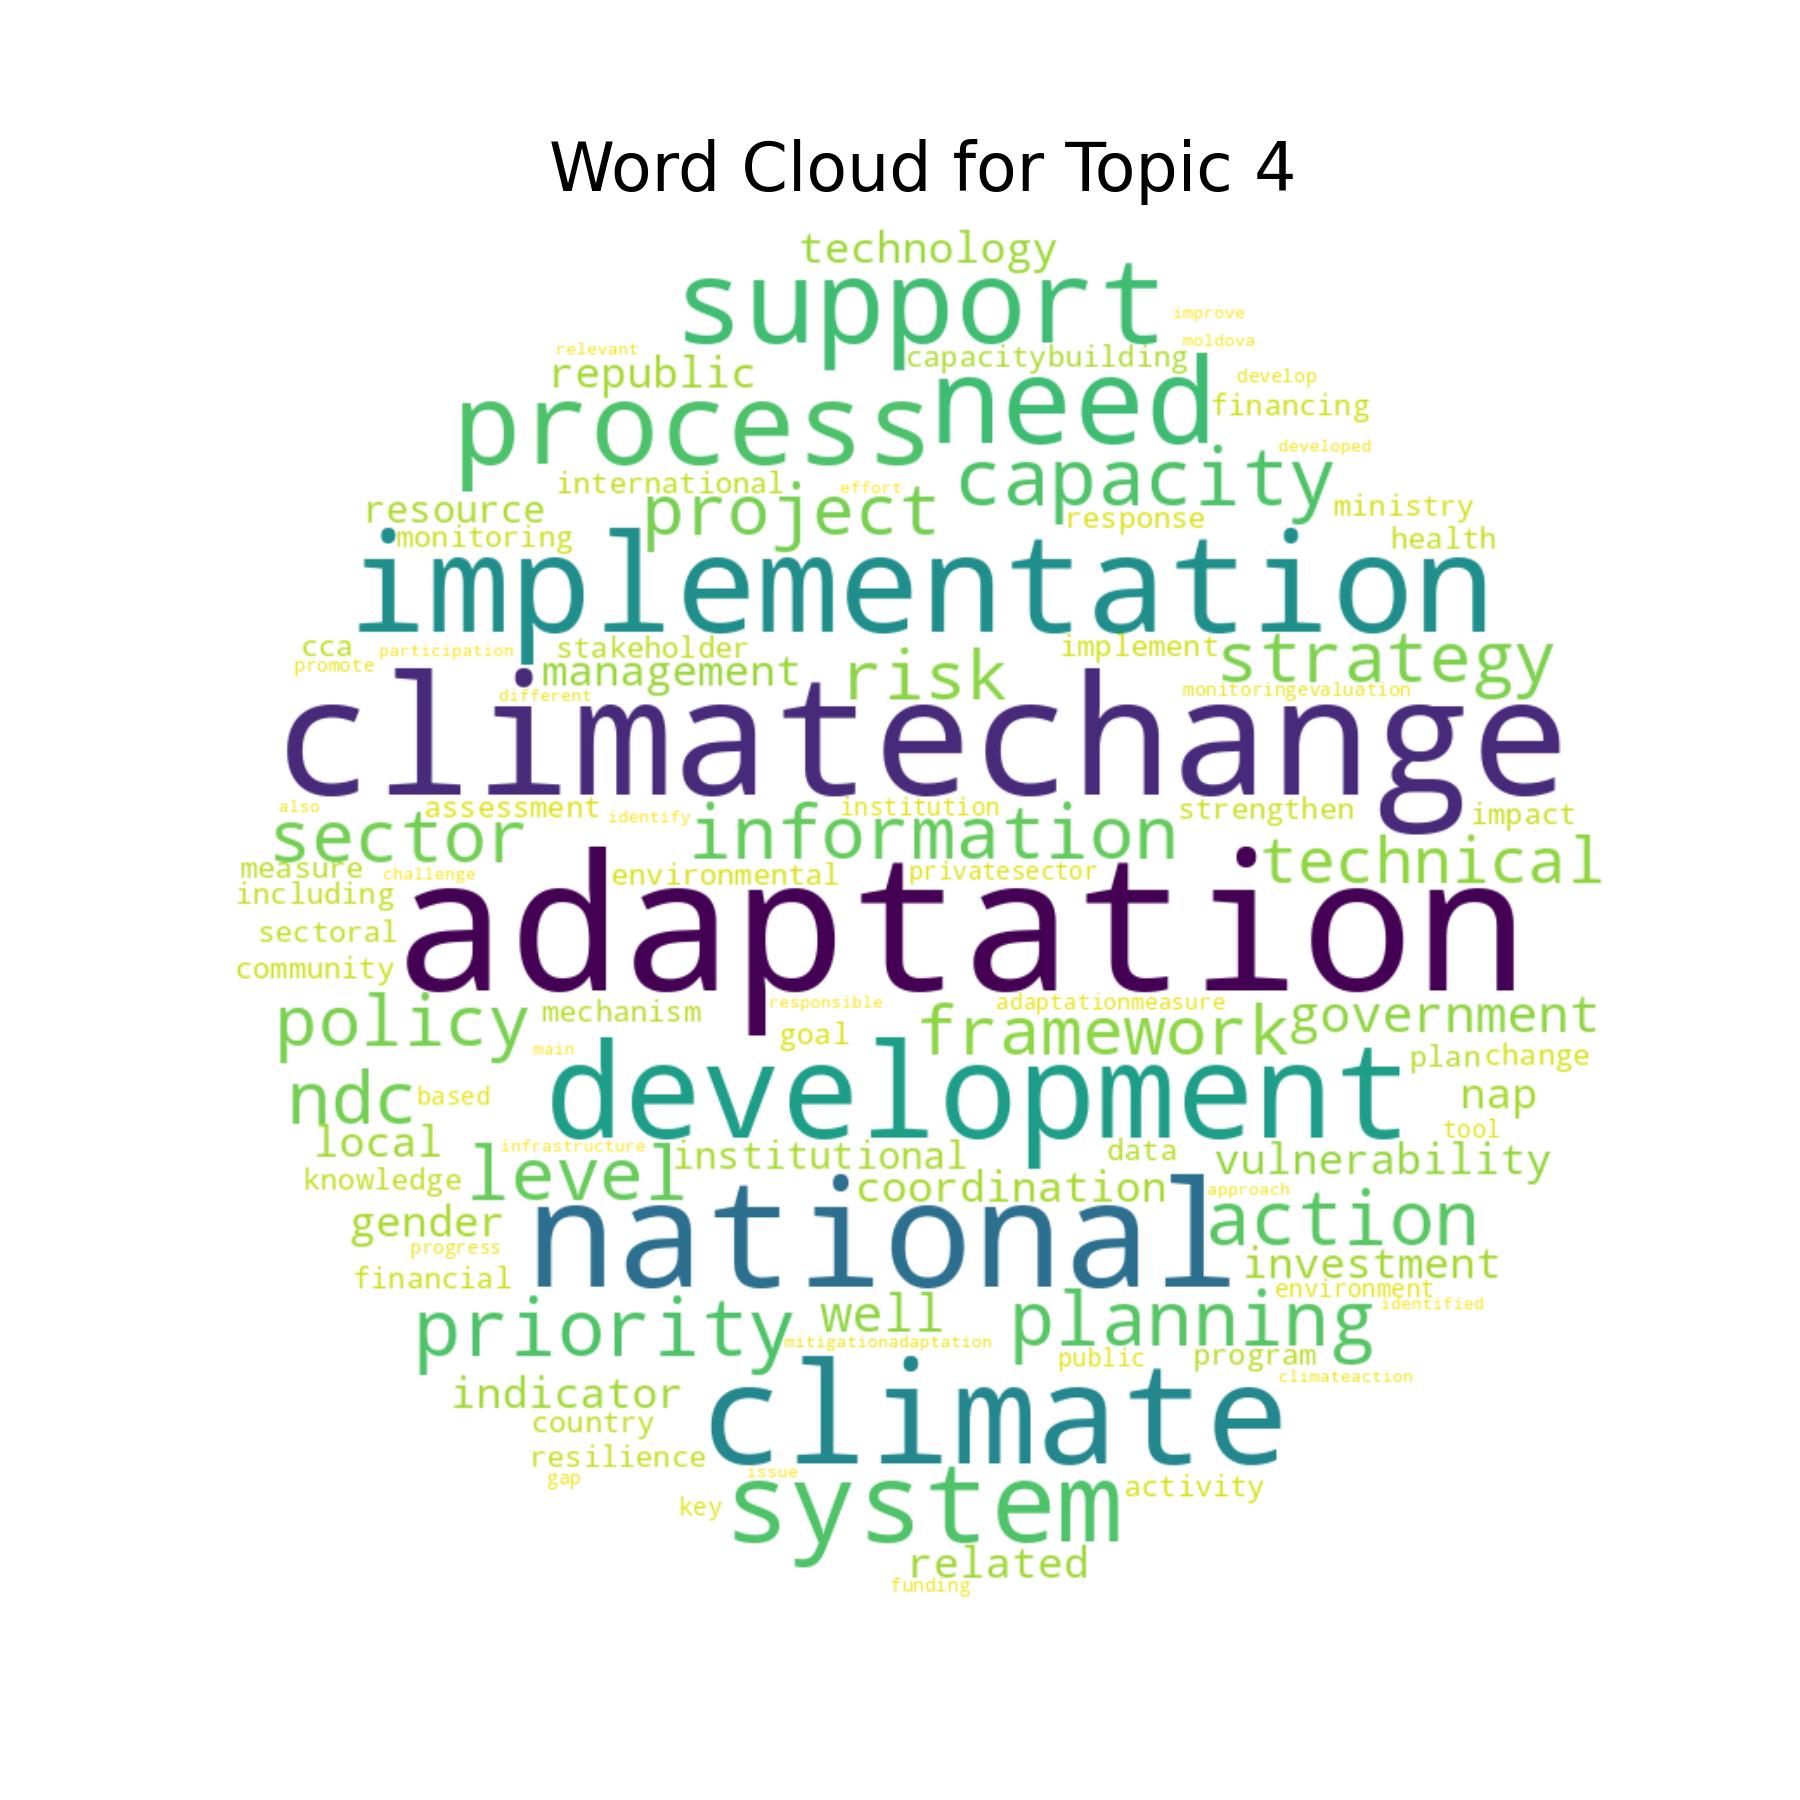 | T5: Targets and ambition  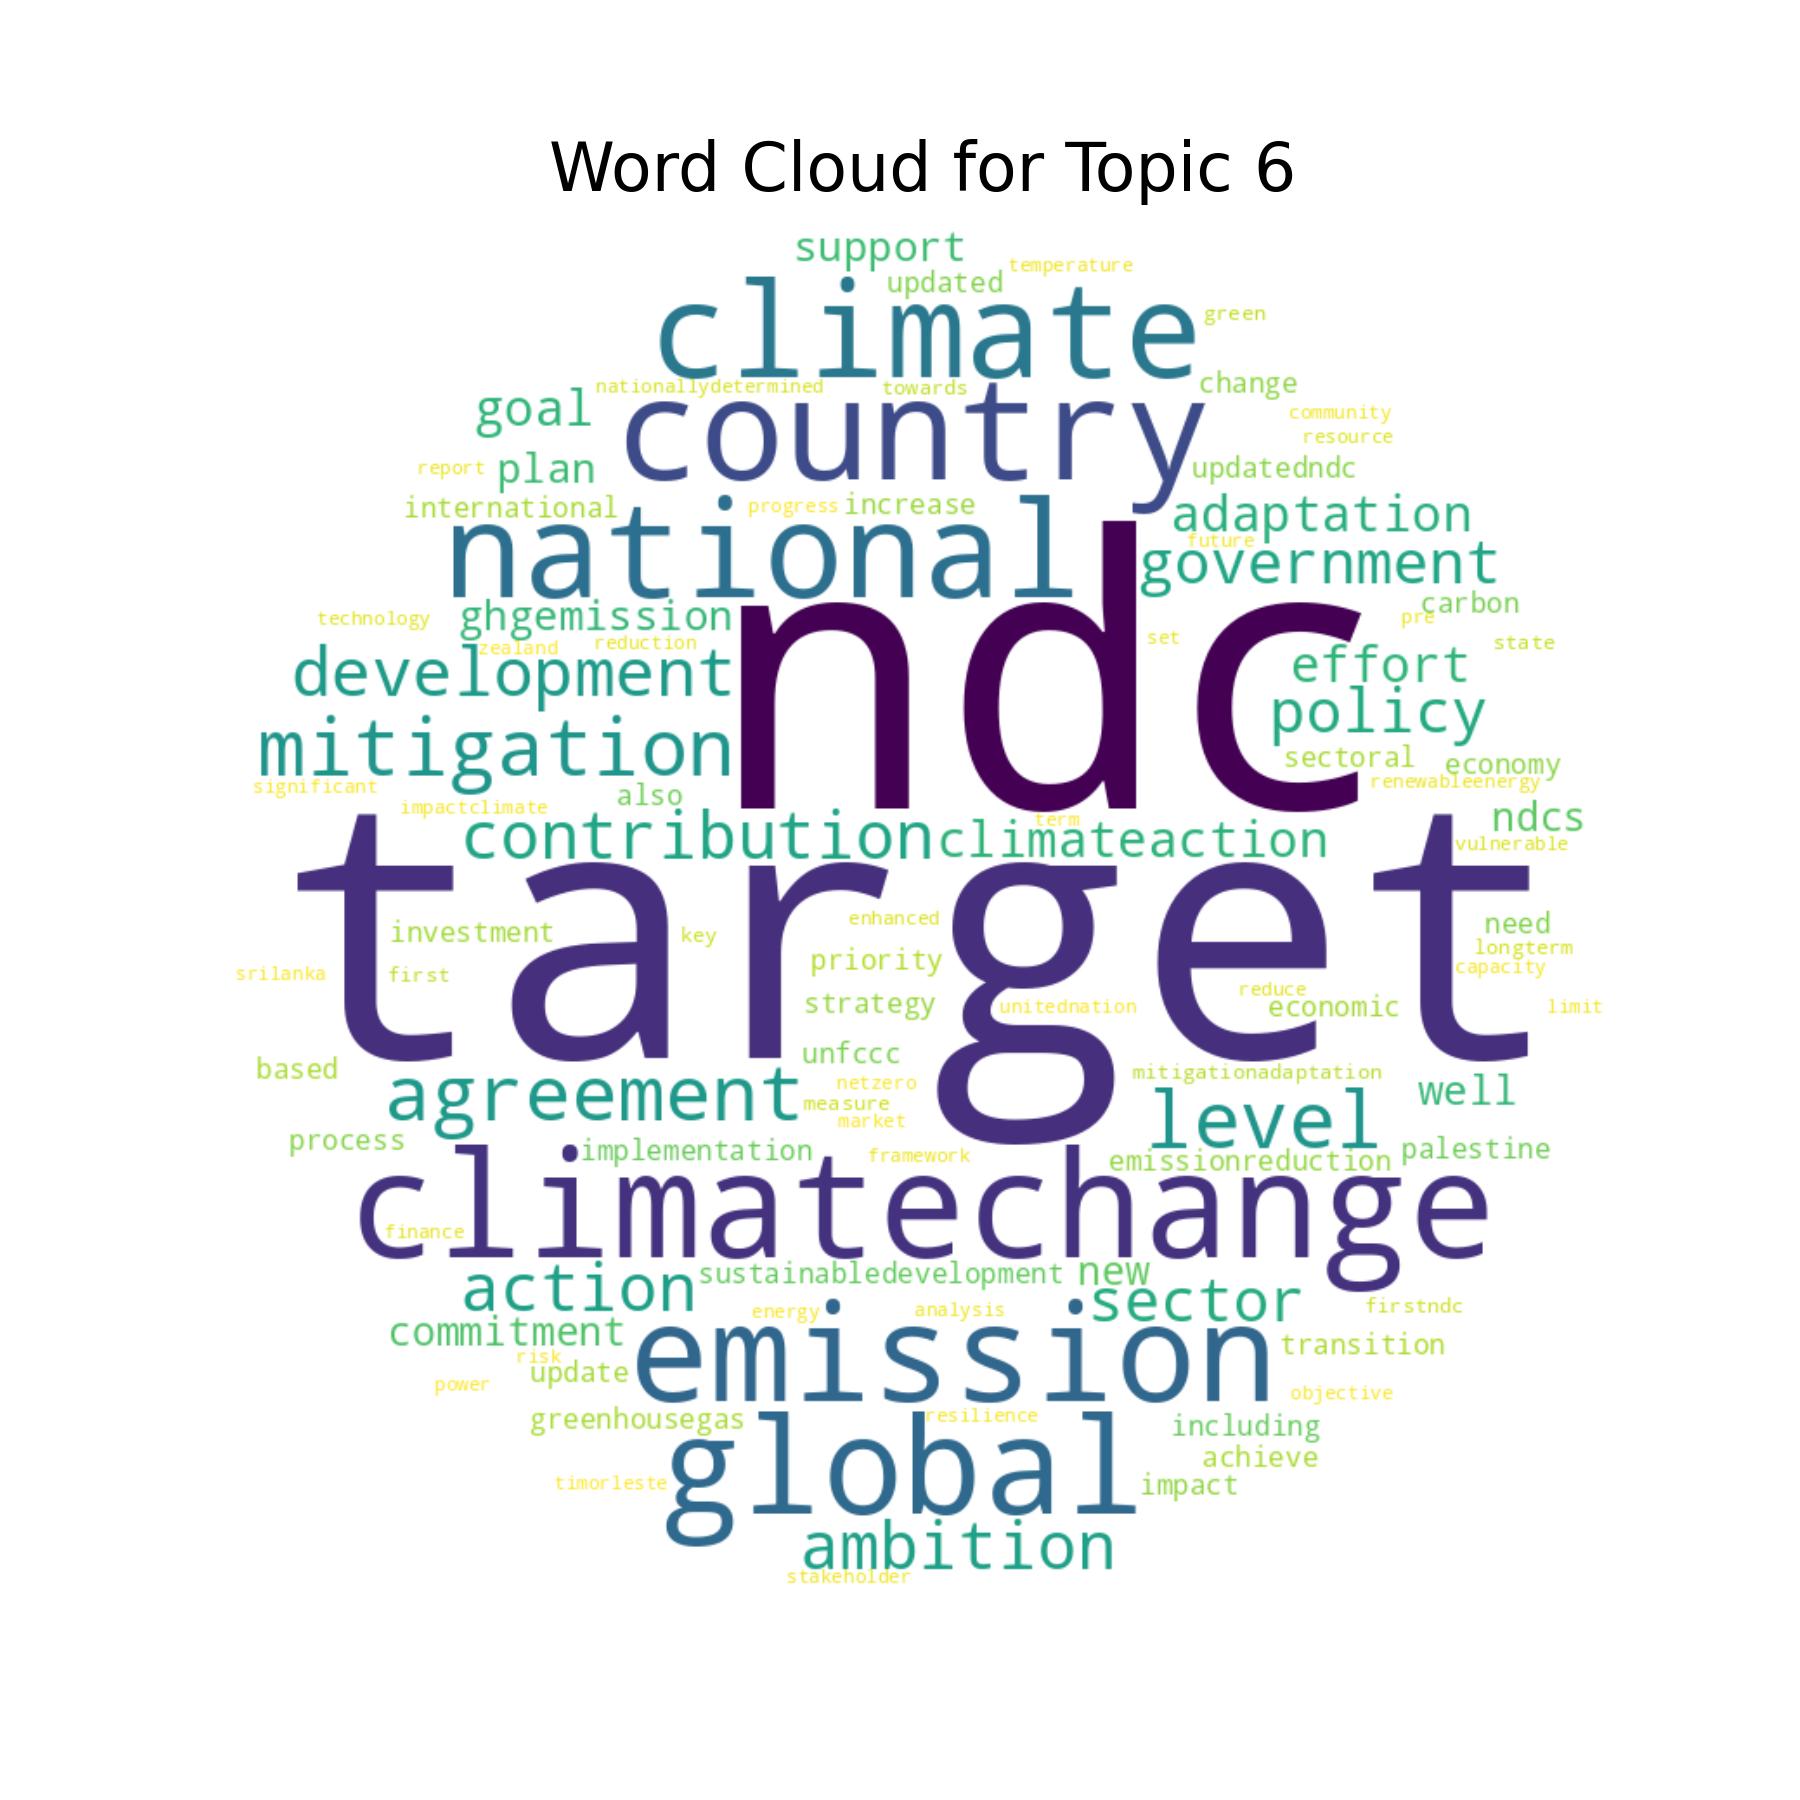 | T6: Climate impact  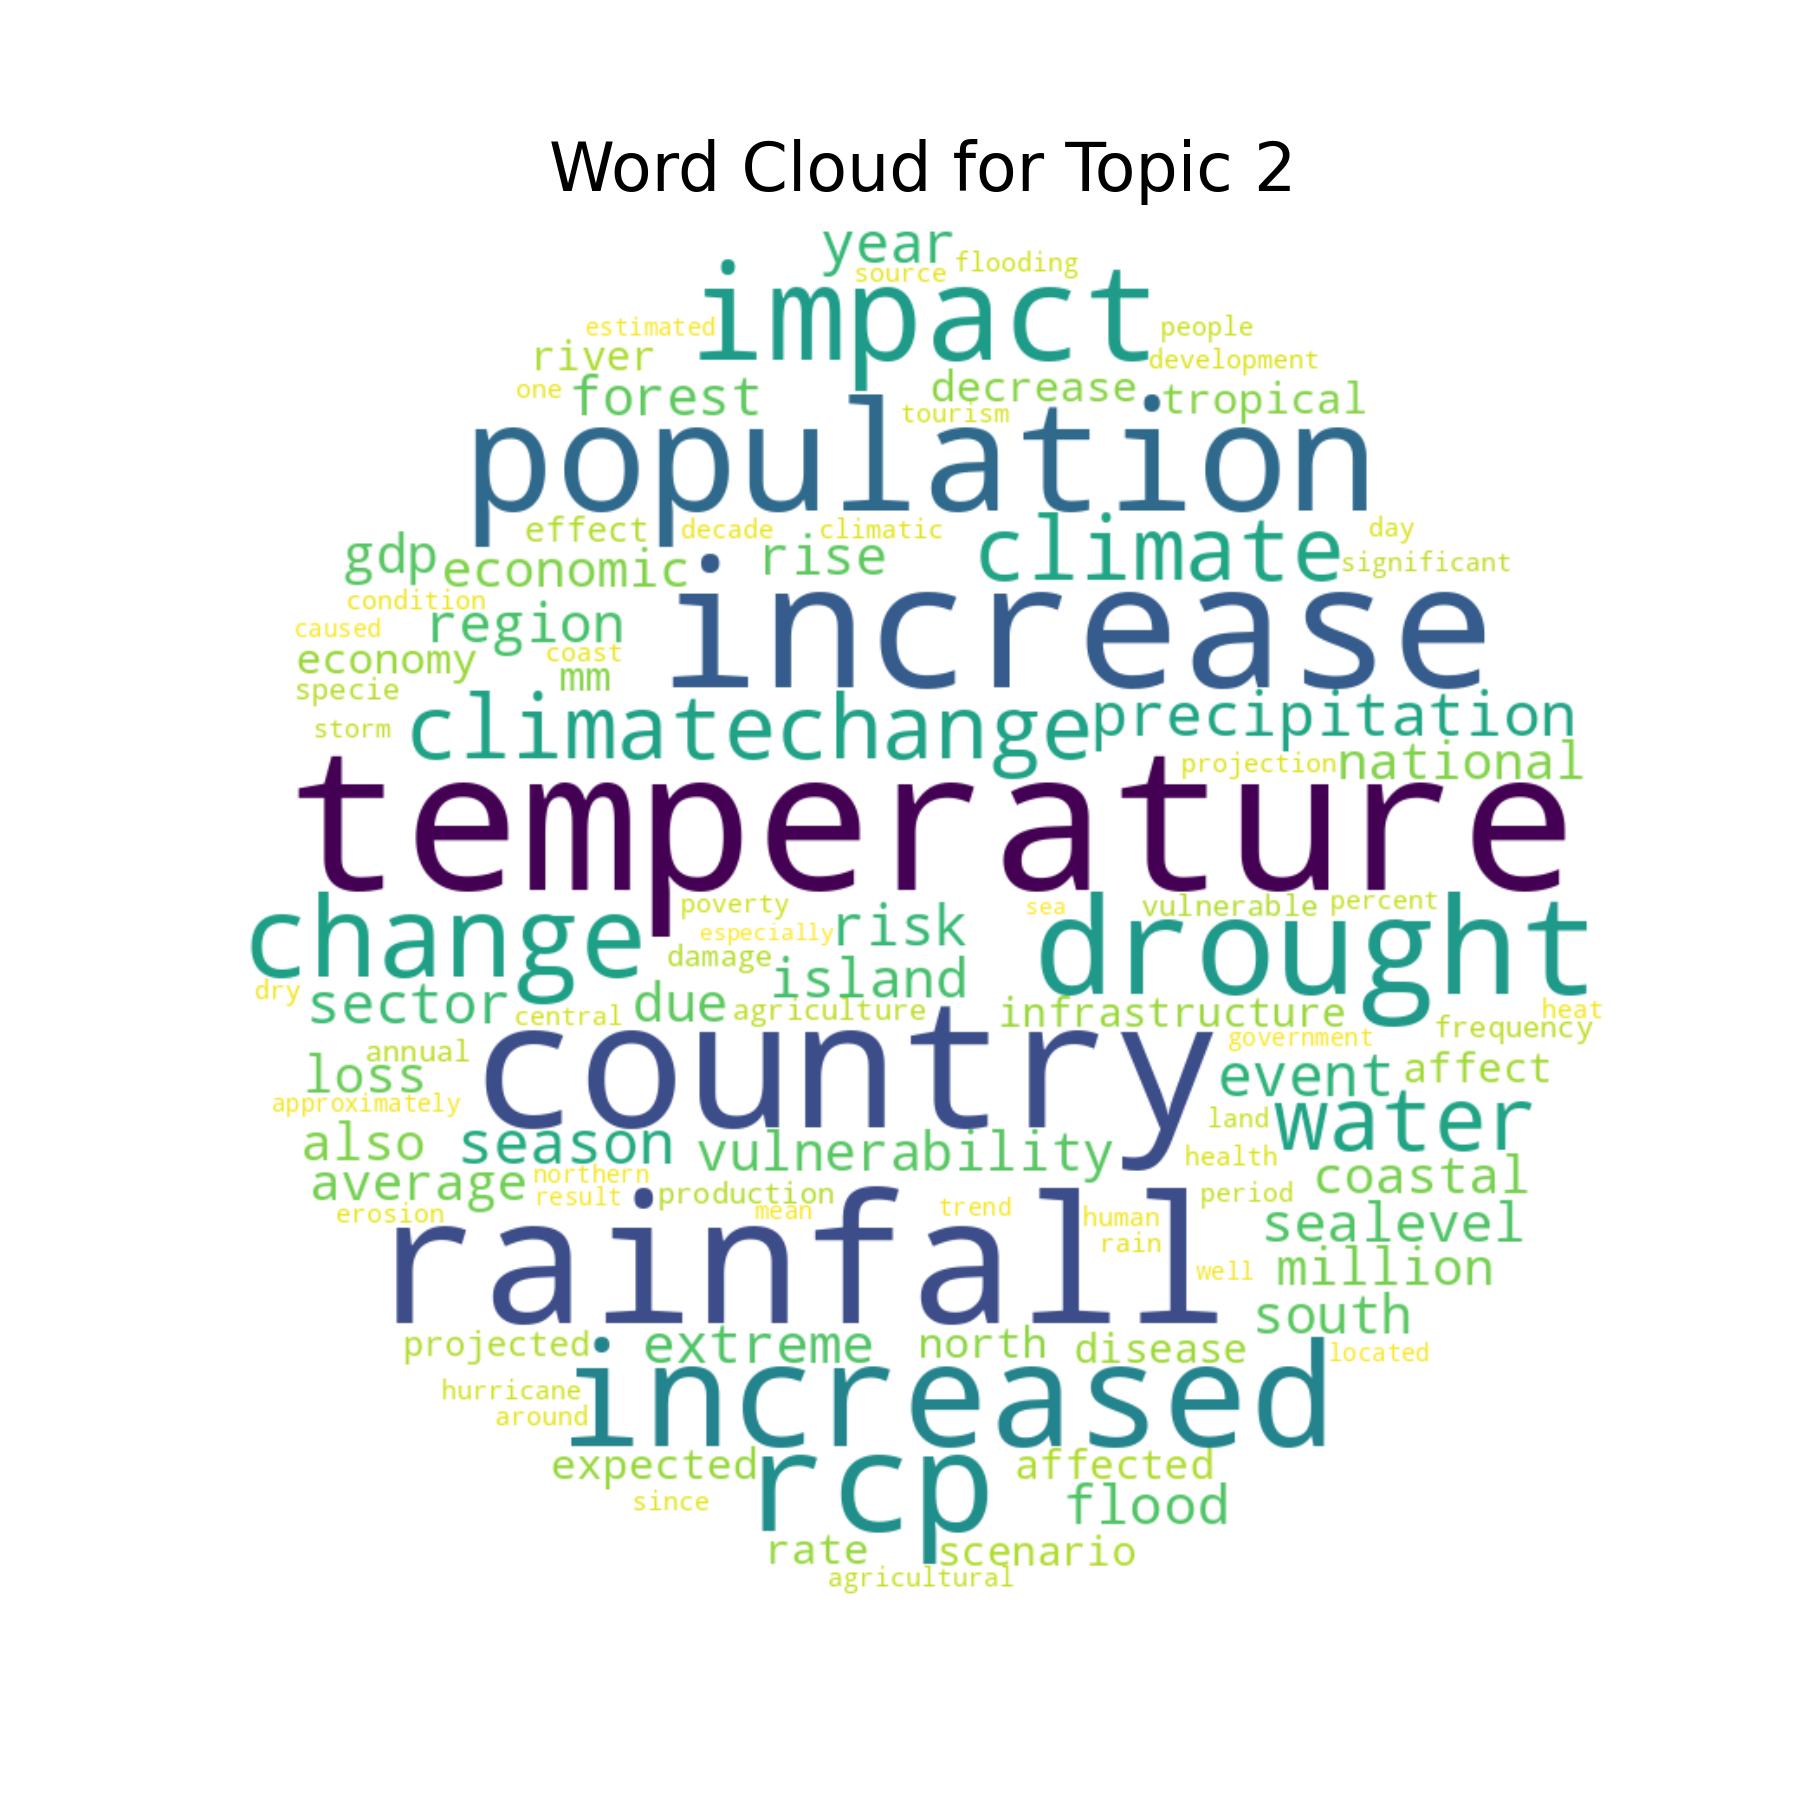 | T7: Governance and direction  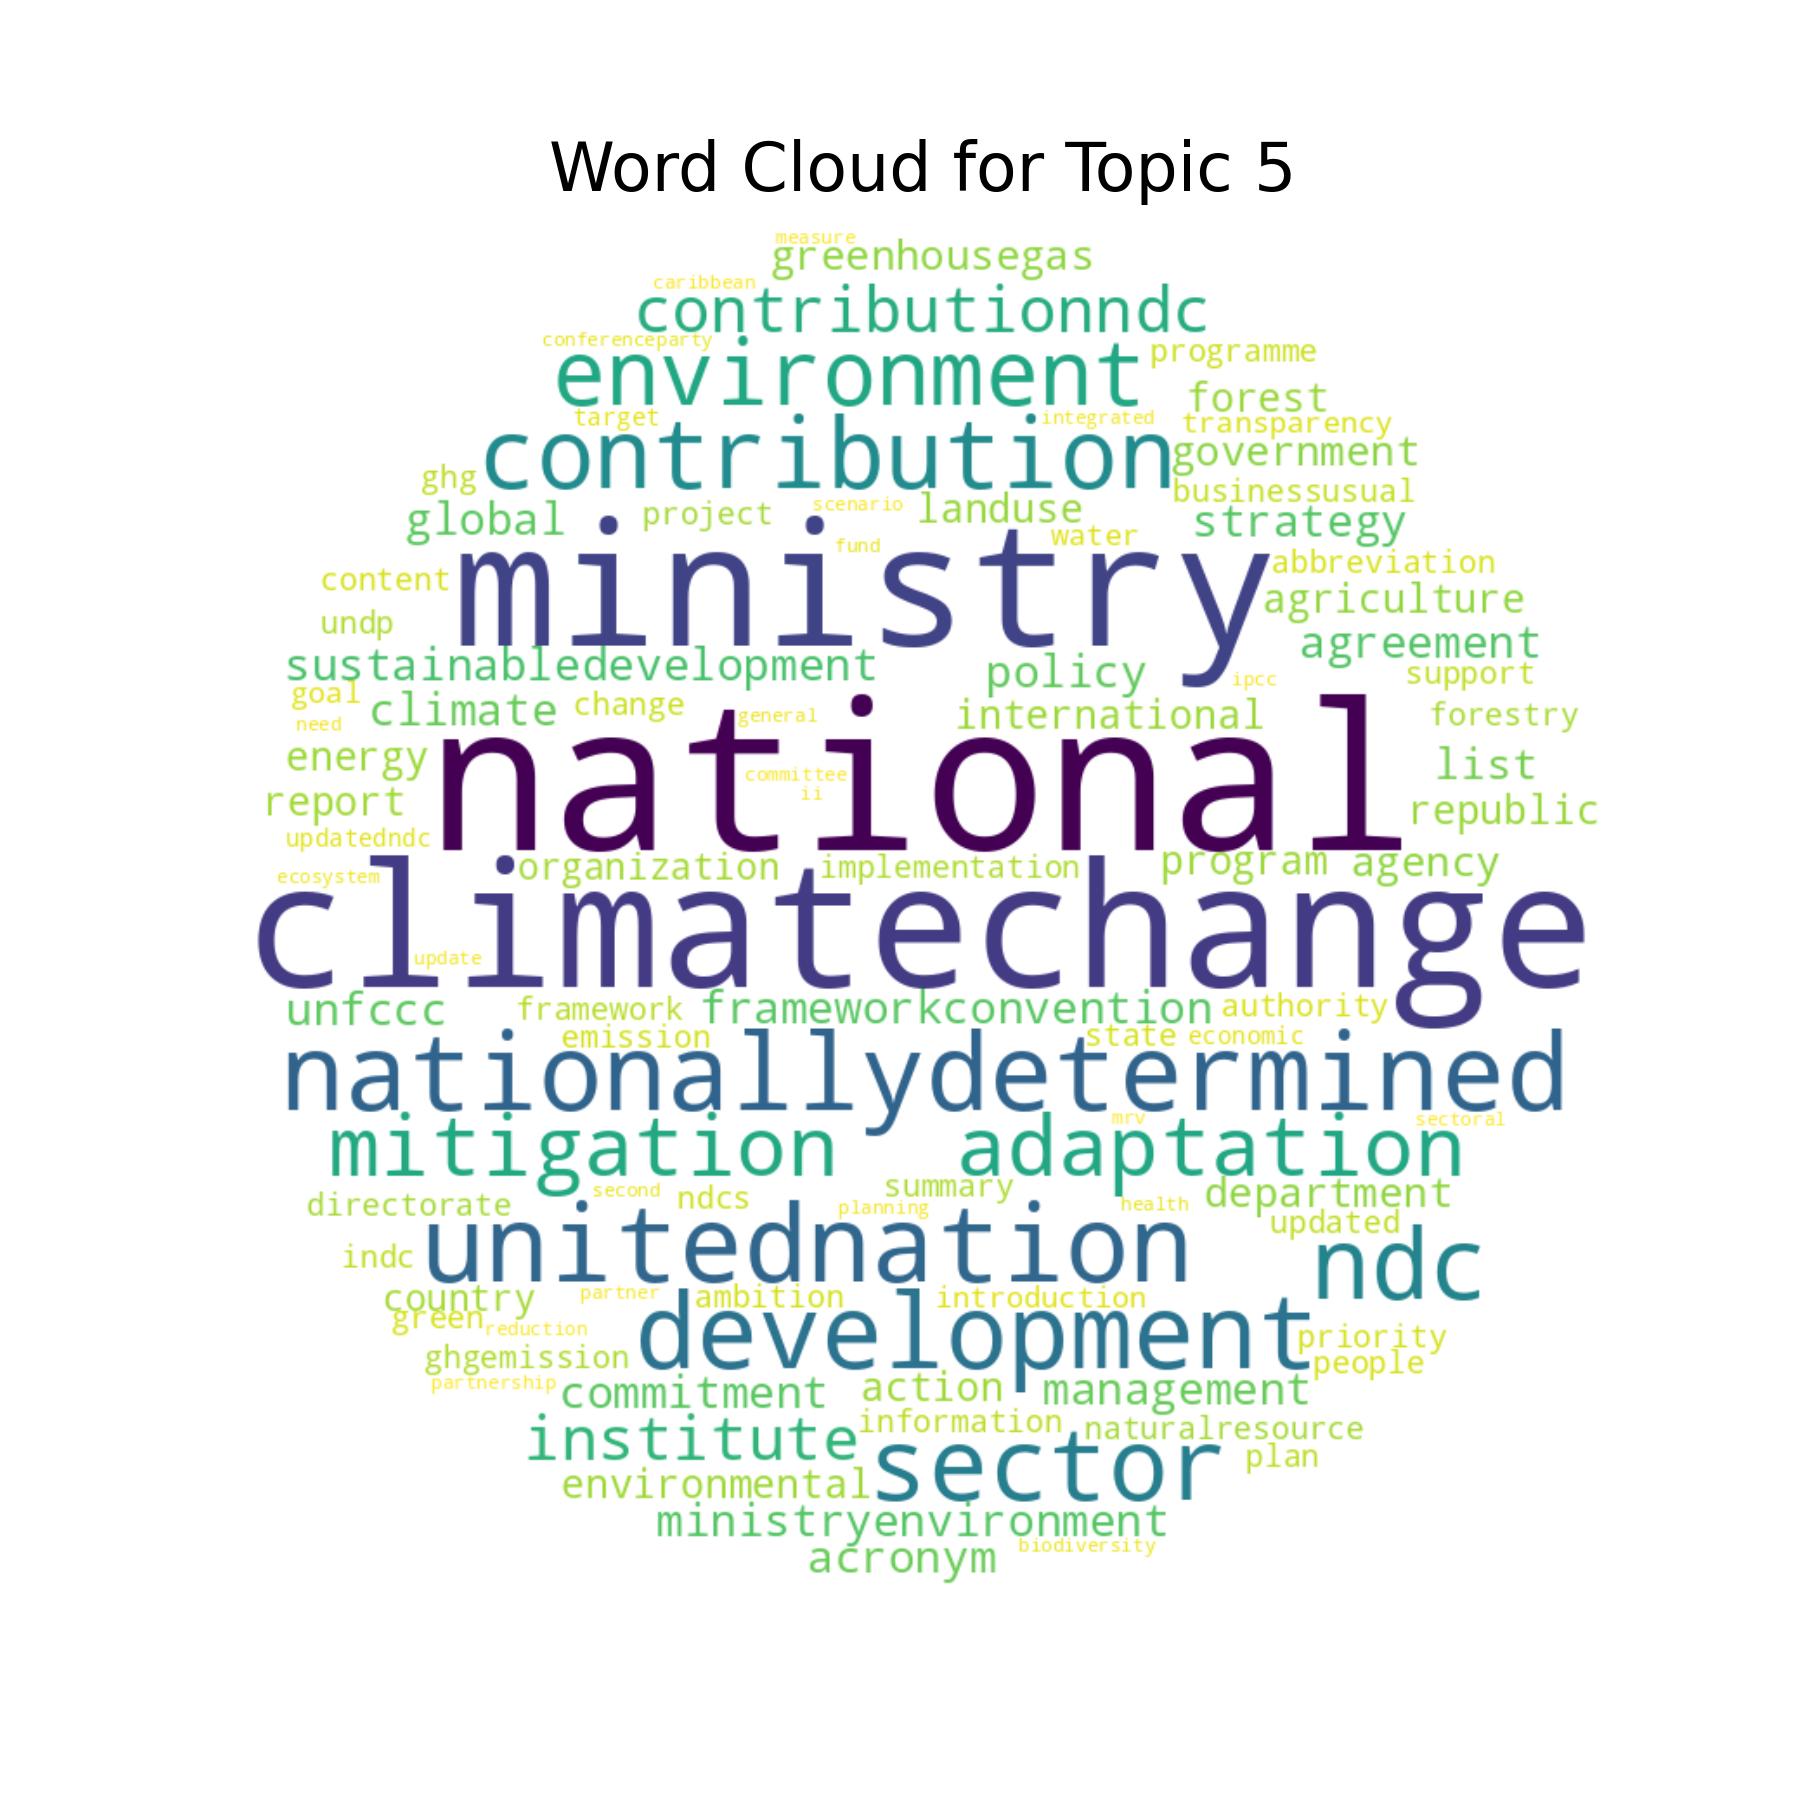 | T8: Regulatory frameworks  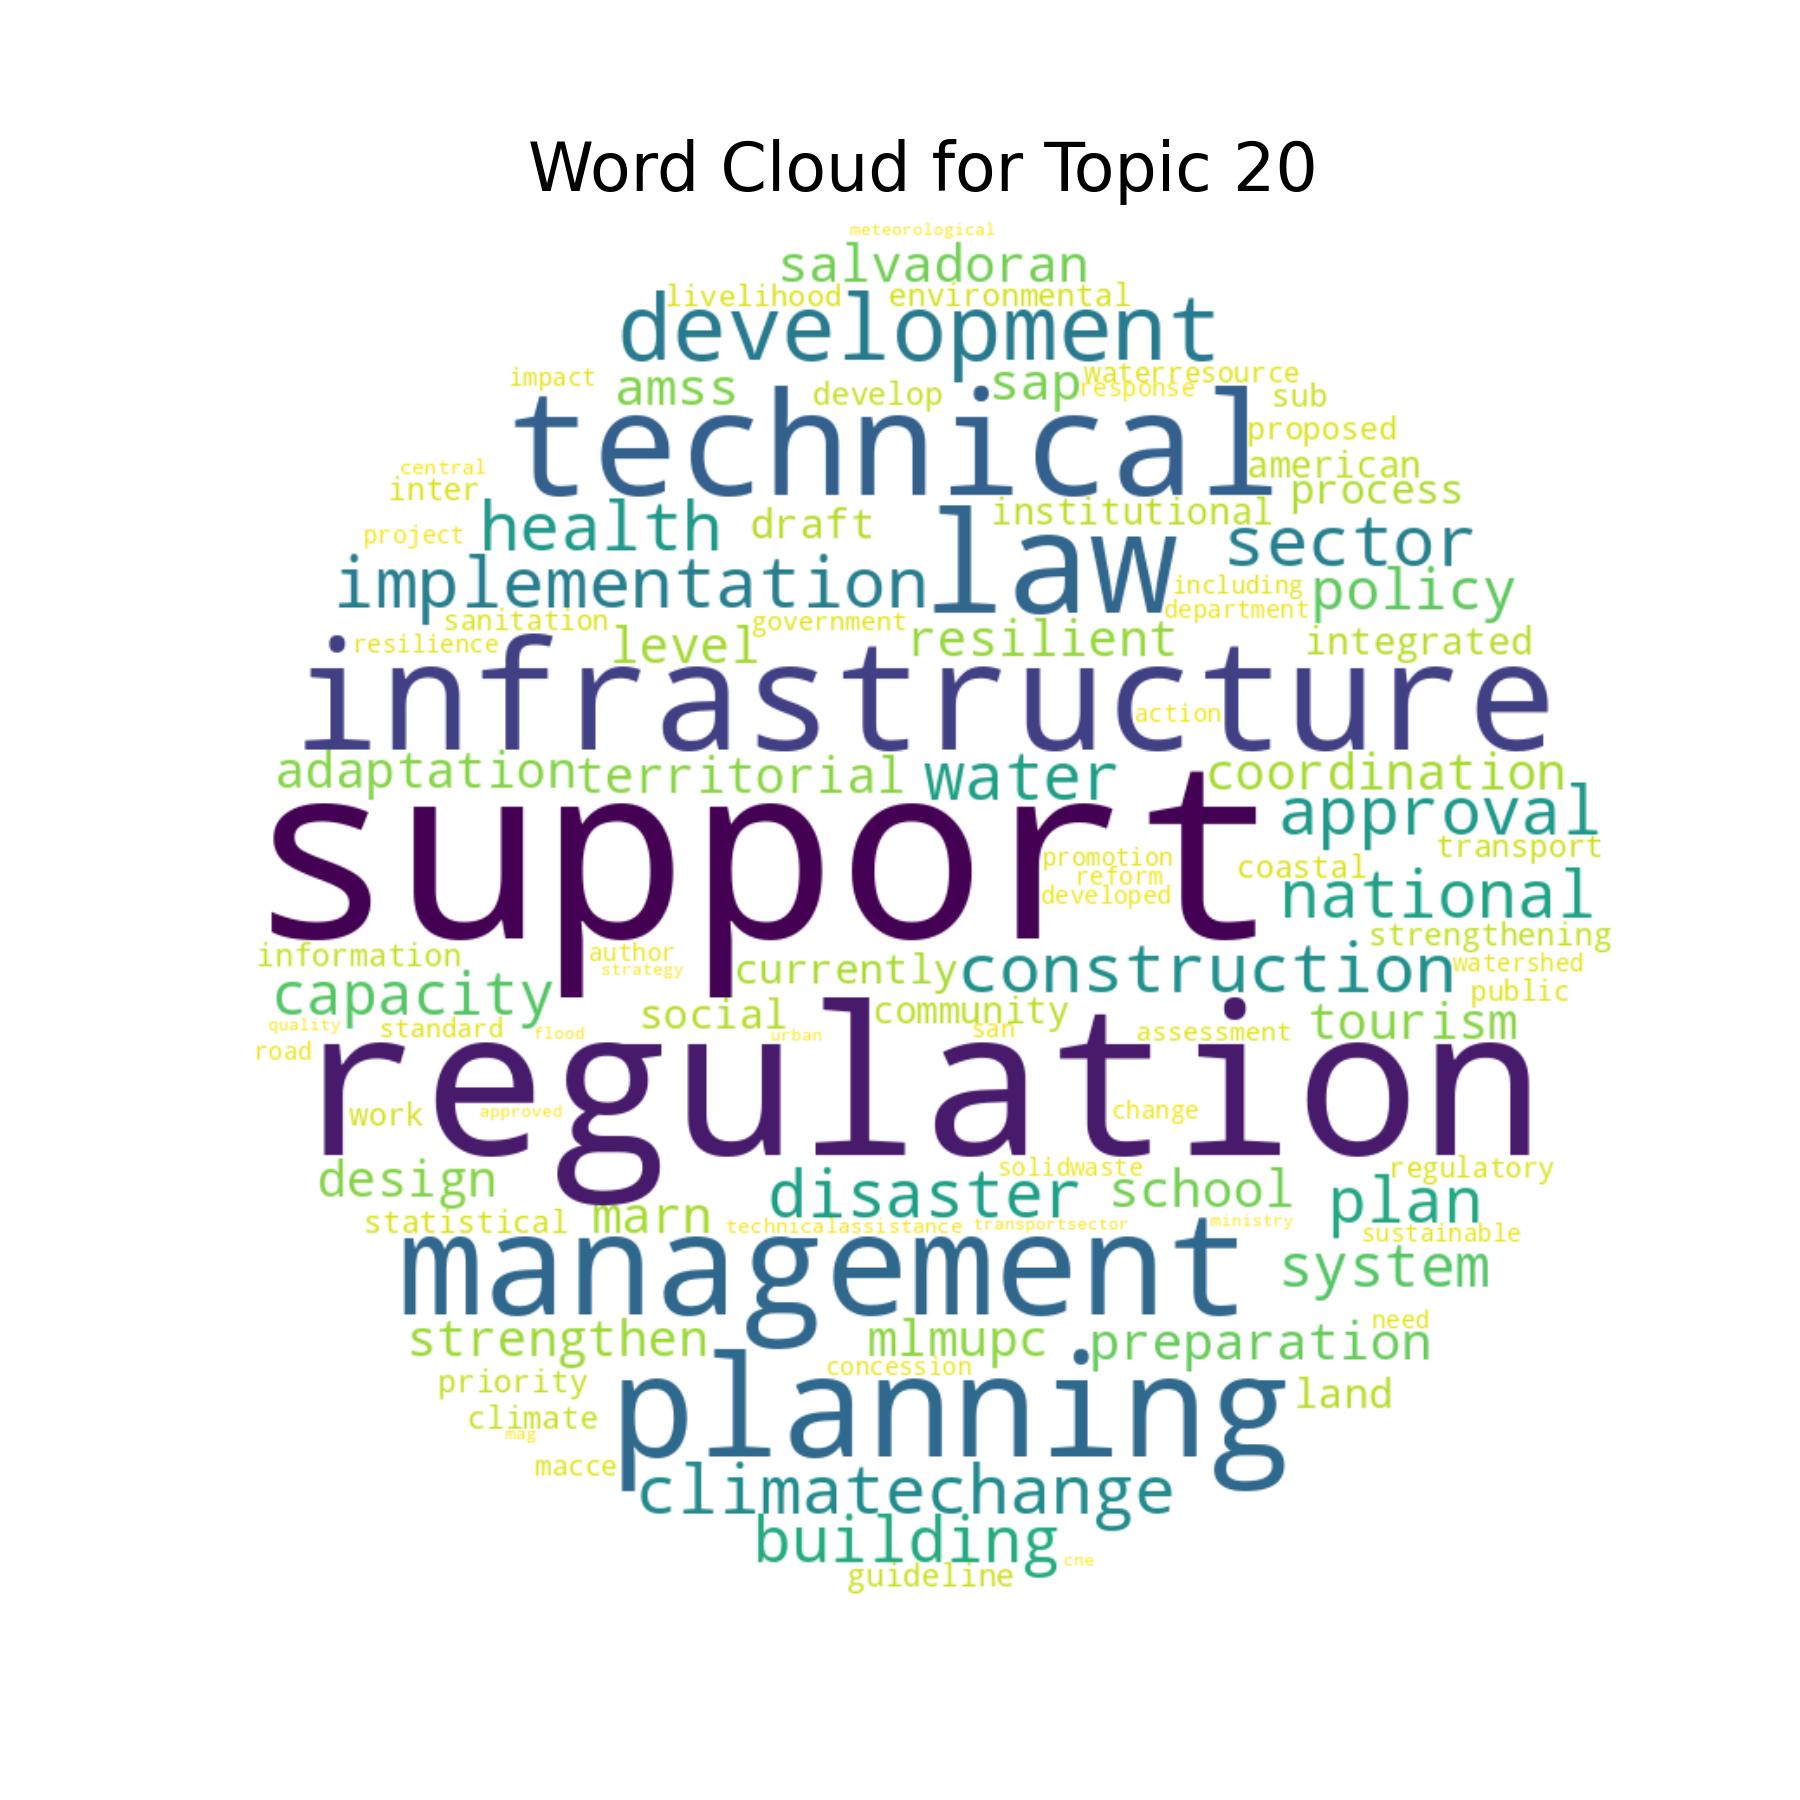 |
| --- | --- | --- | --- | --- | --- | --- | --- |
| T9: Sustainable resource use  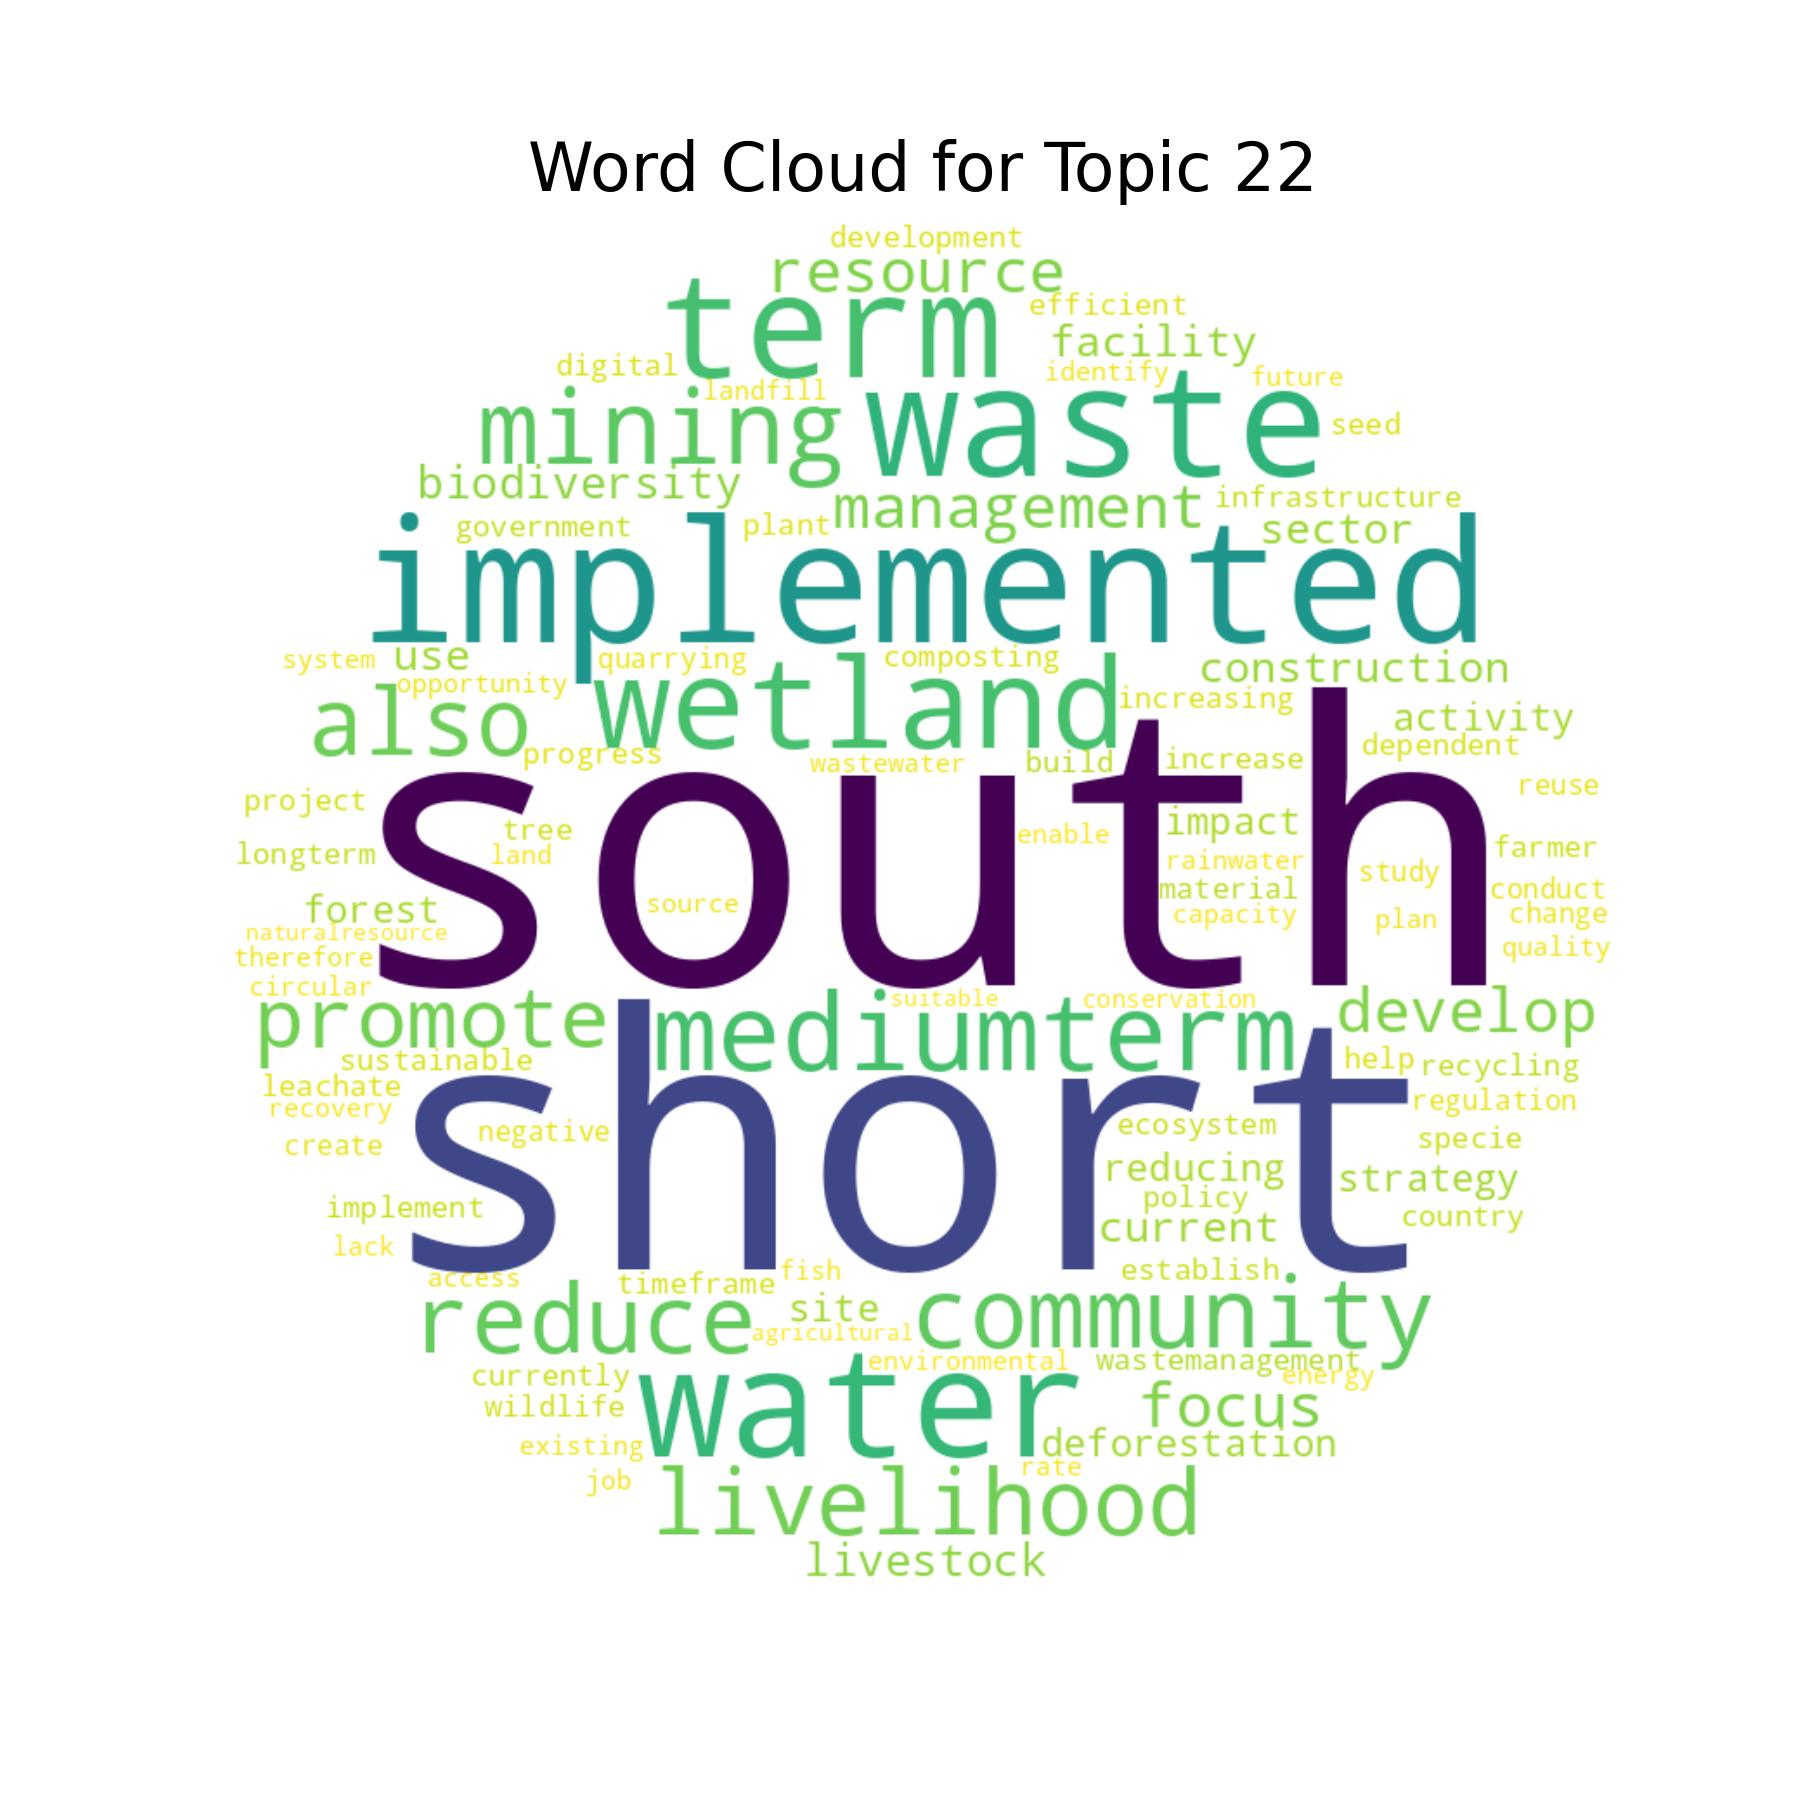 | T10: Waste and emission  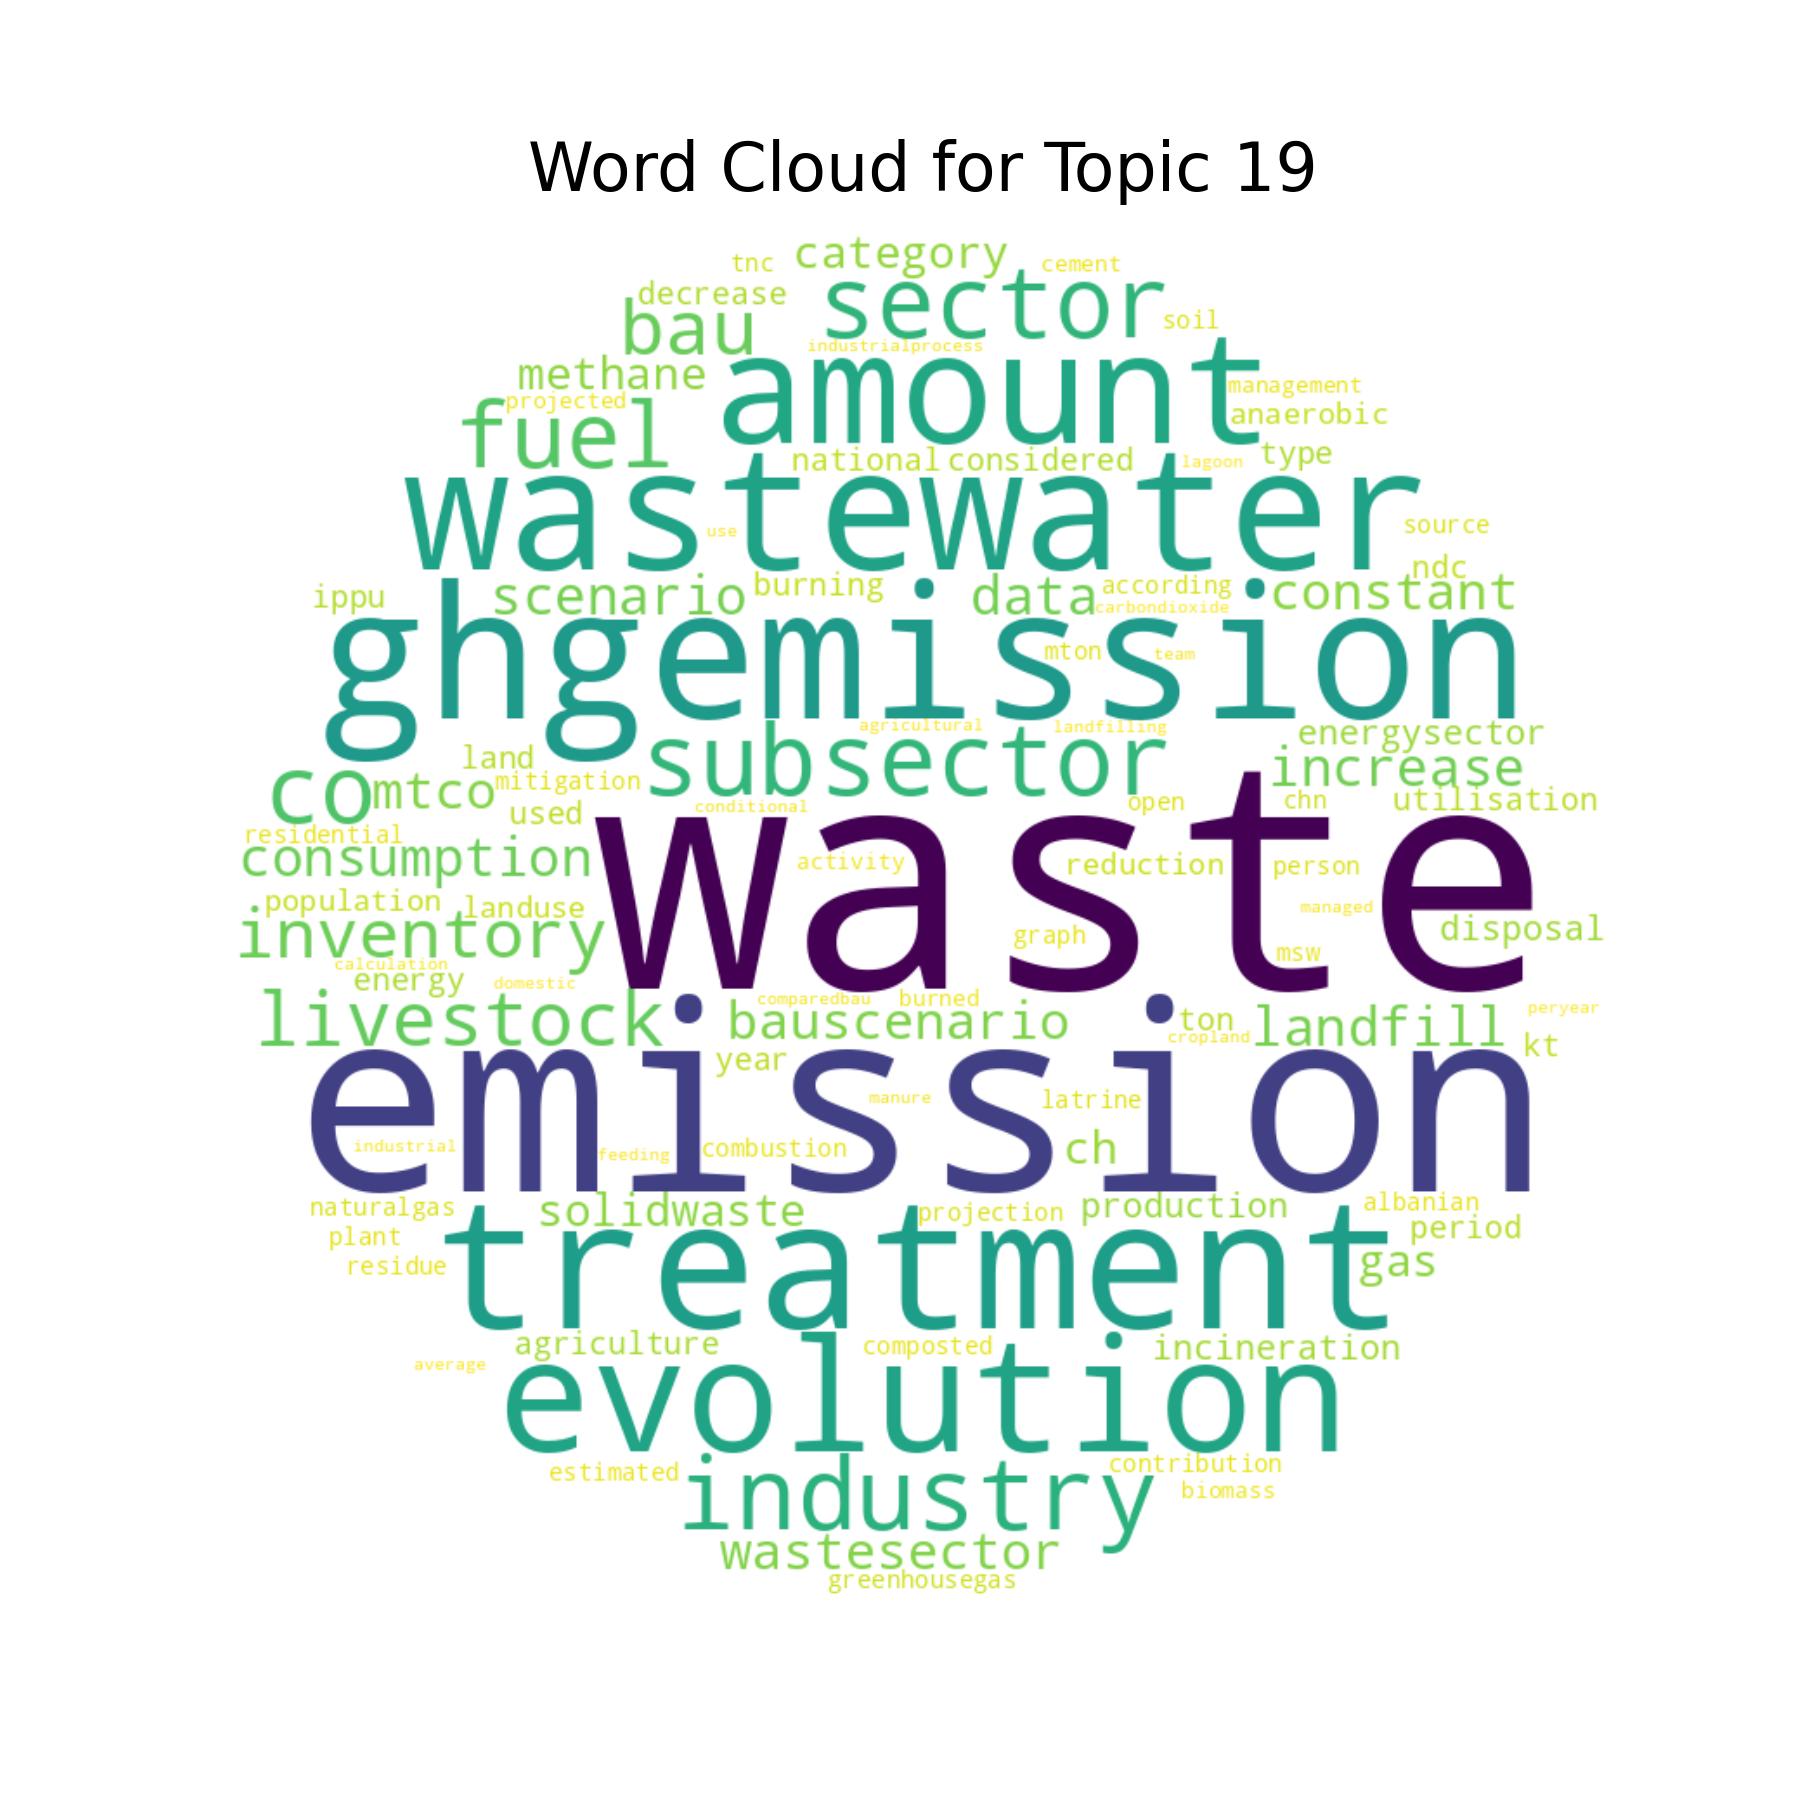 | T11: Environmental ministries  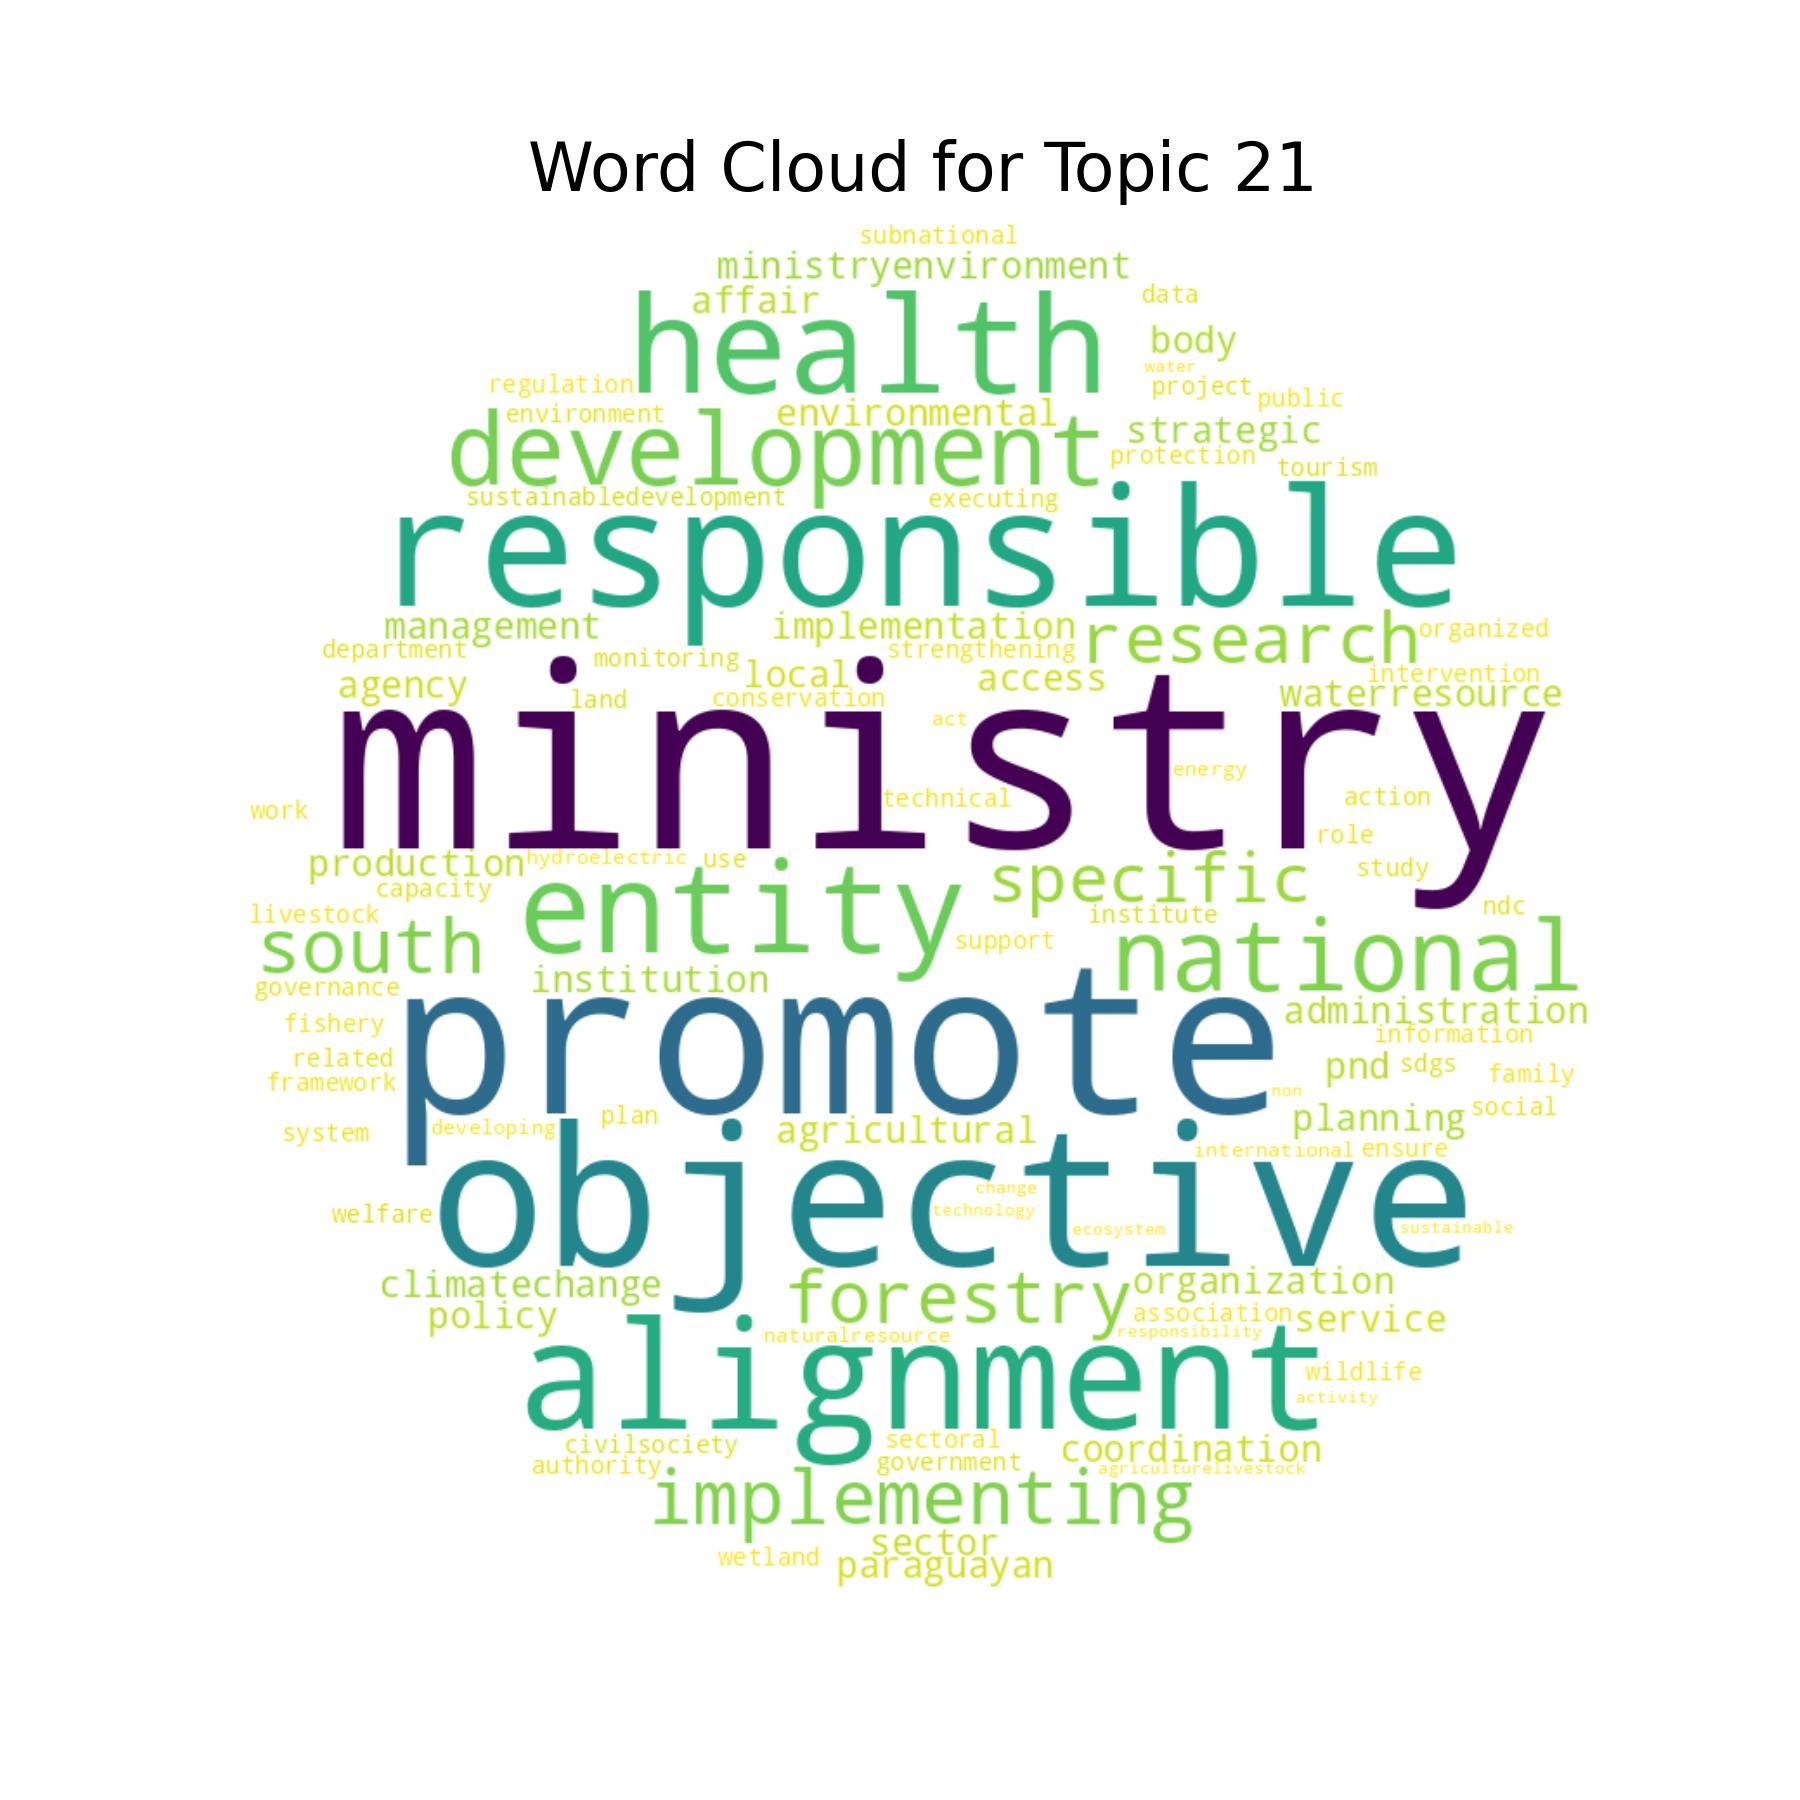 | T12: Projects and management  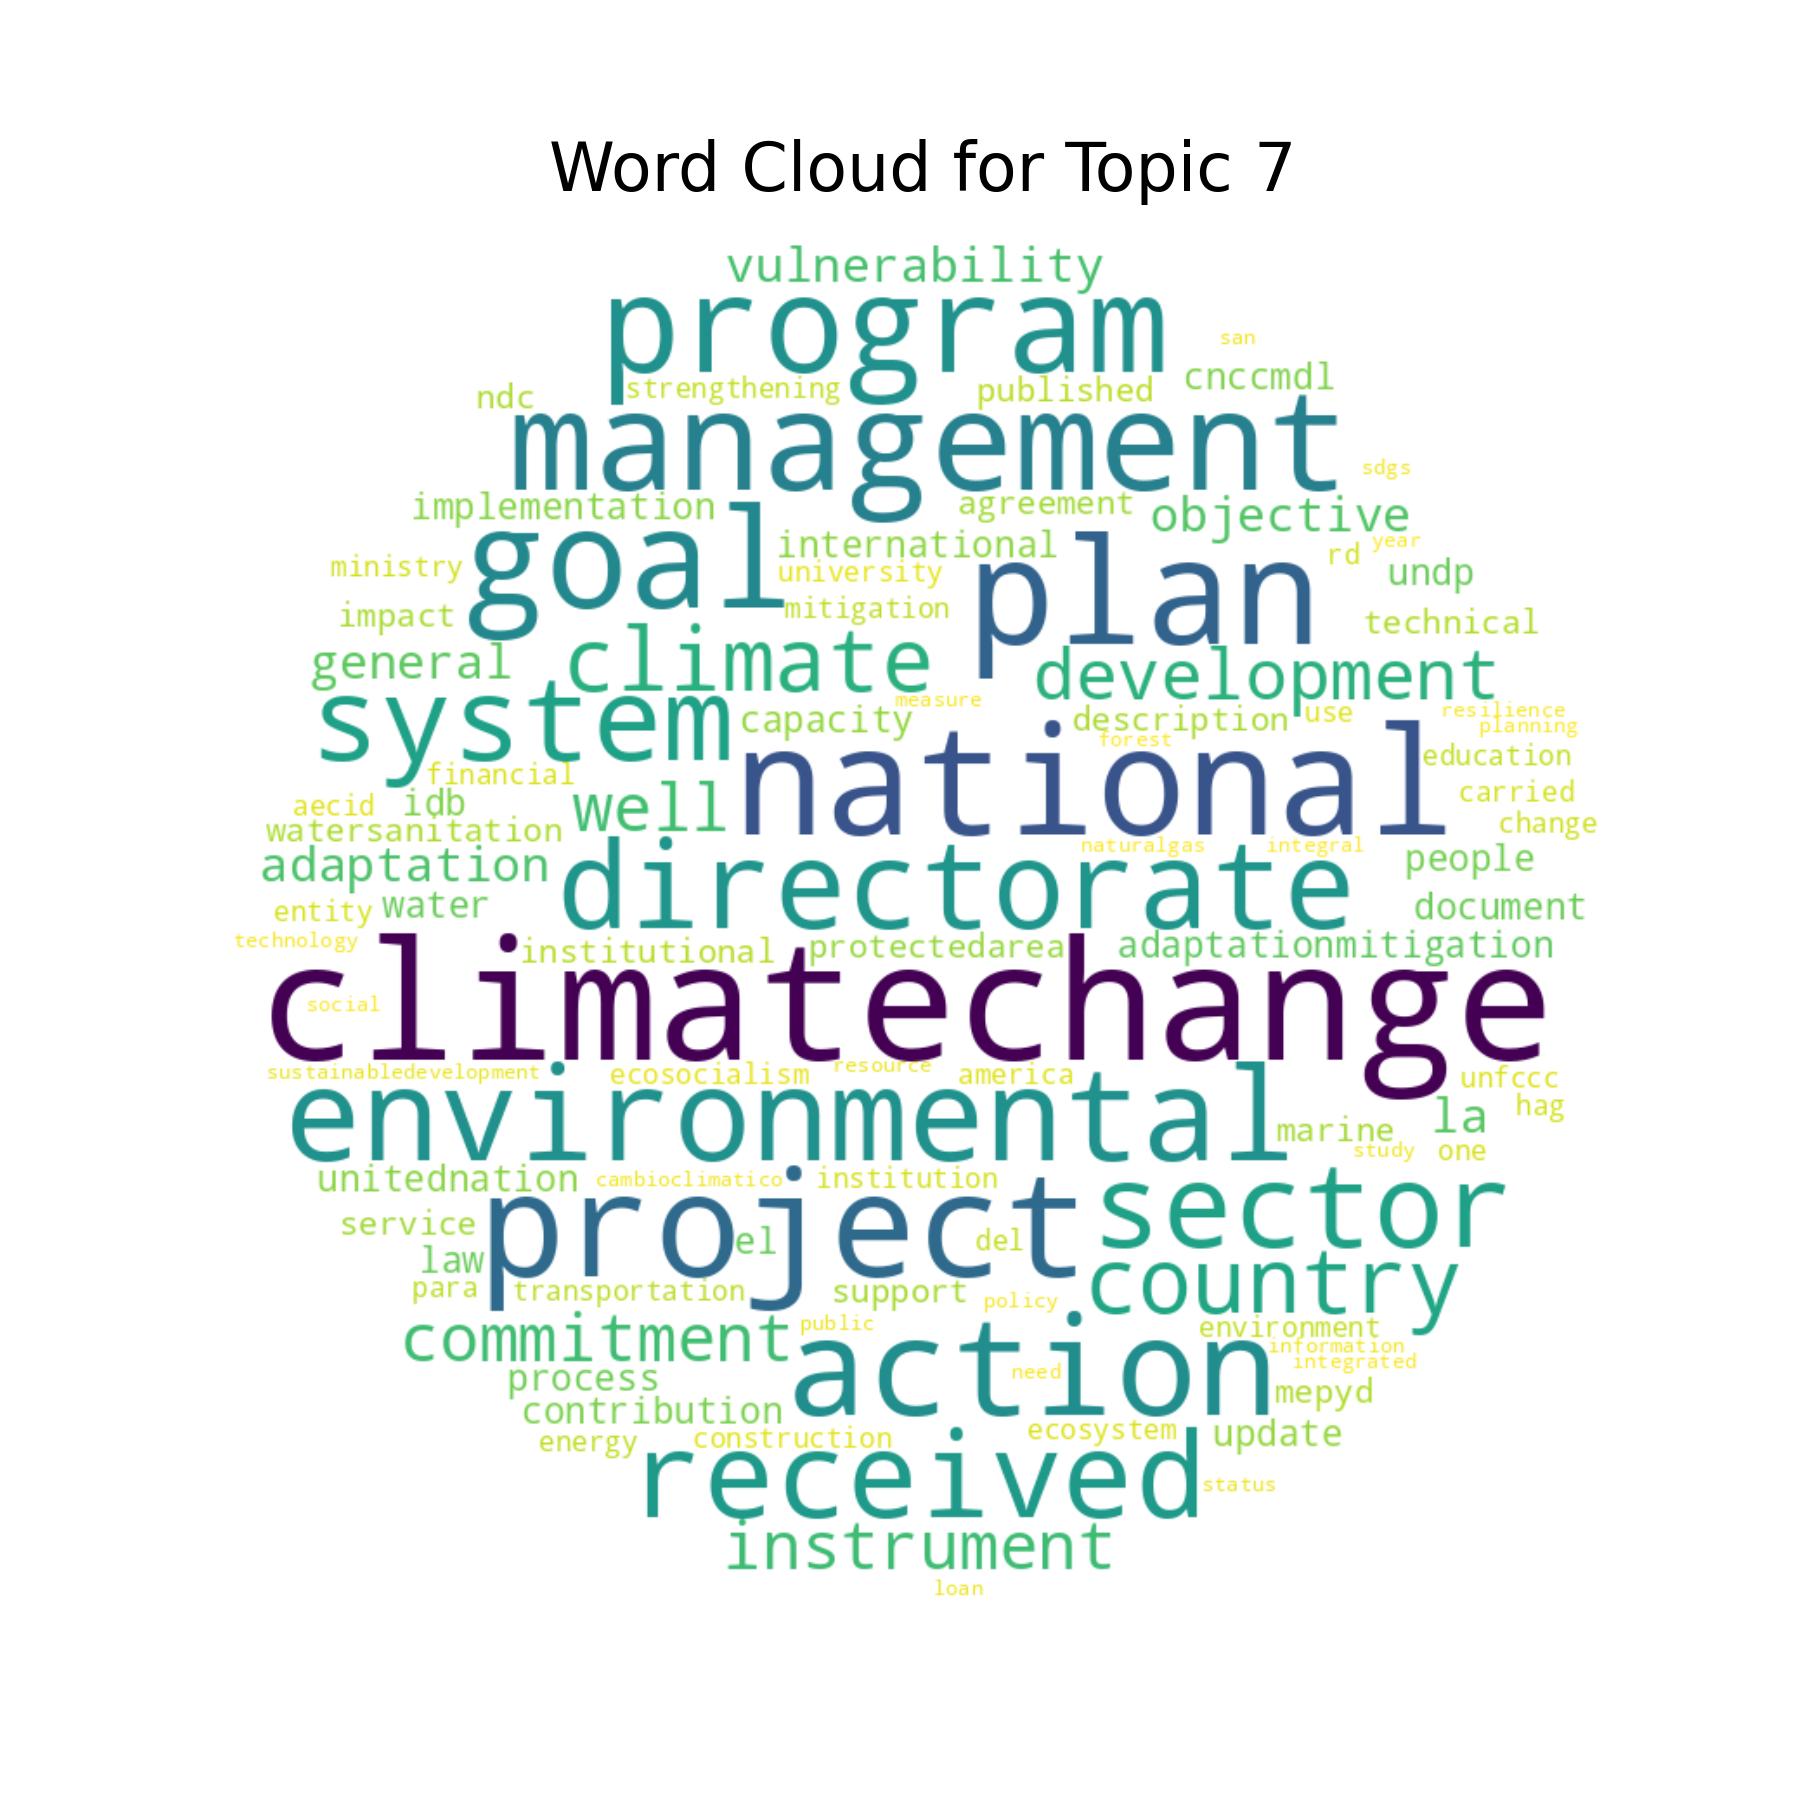 | T13: Gender and community  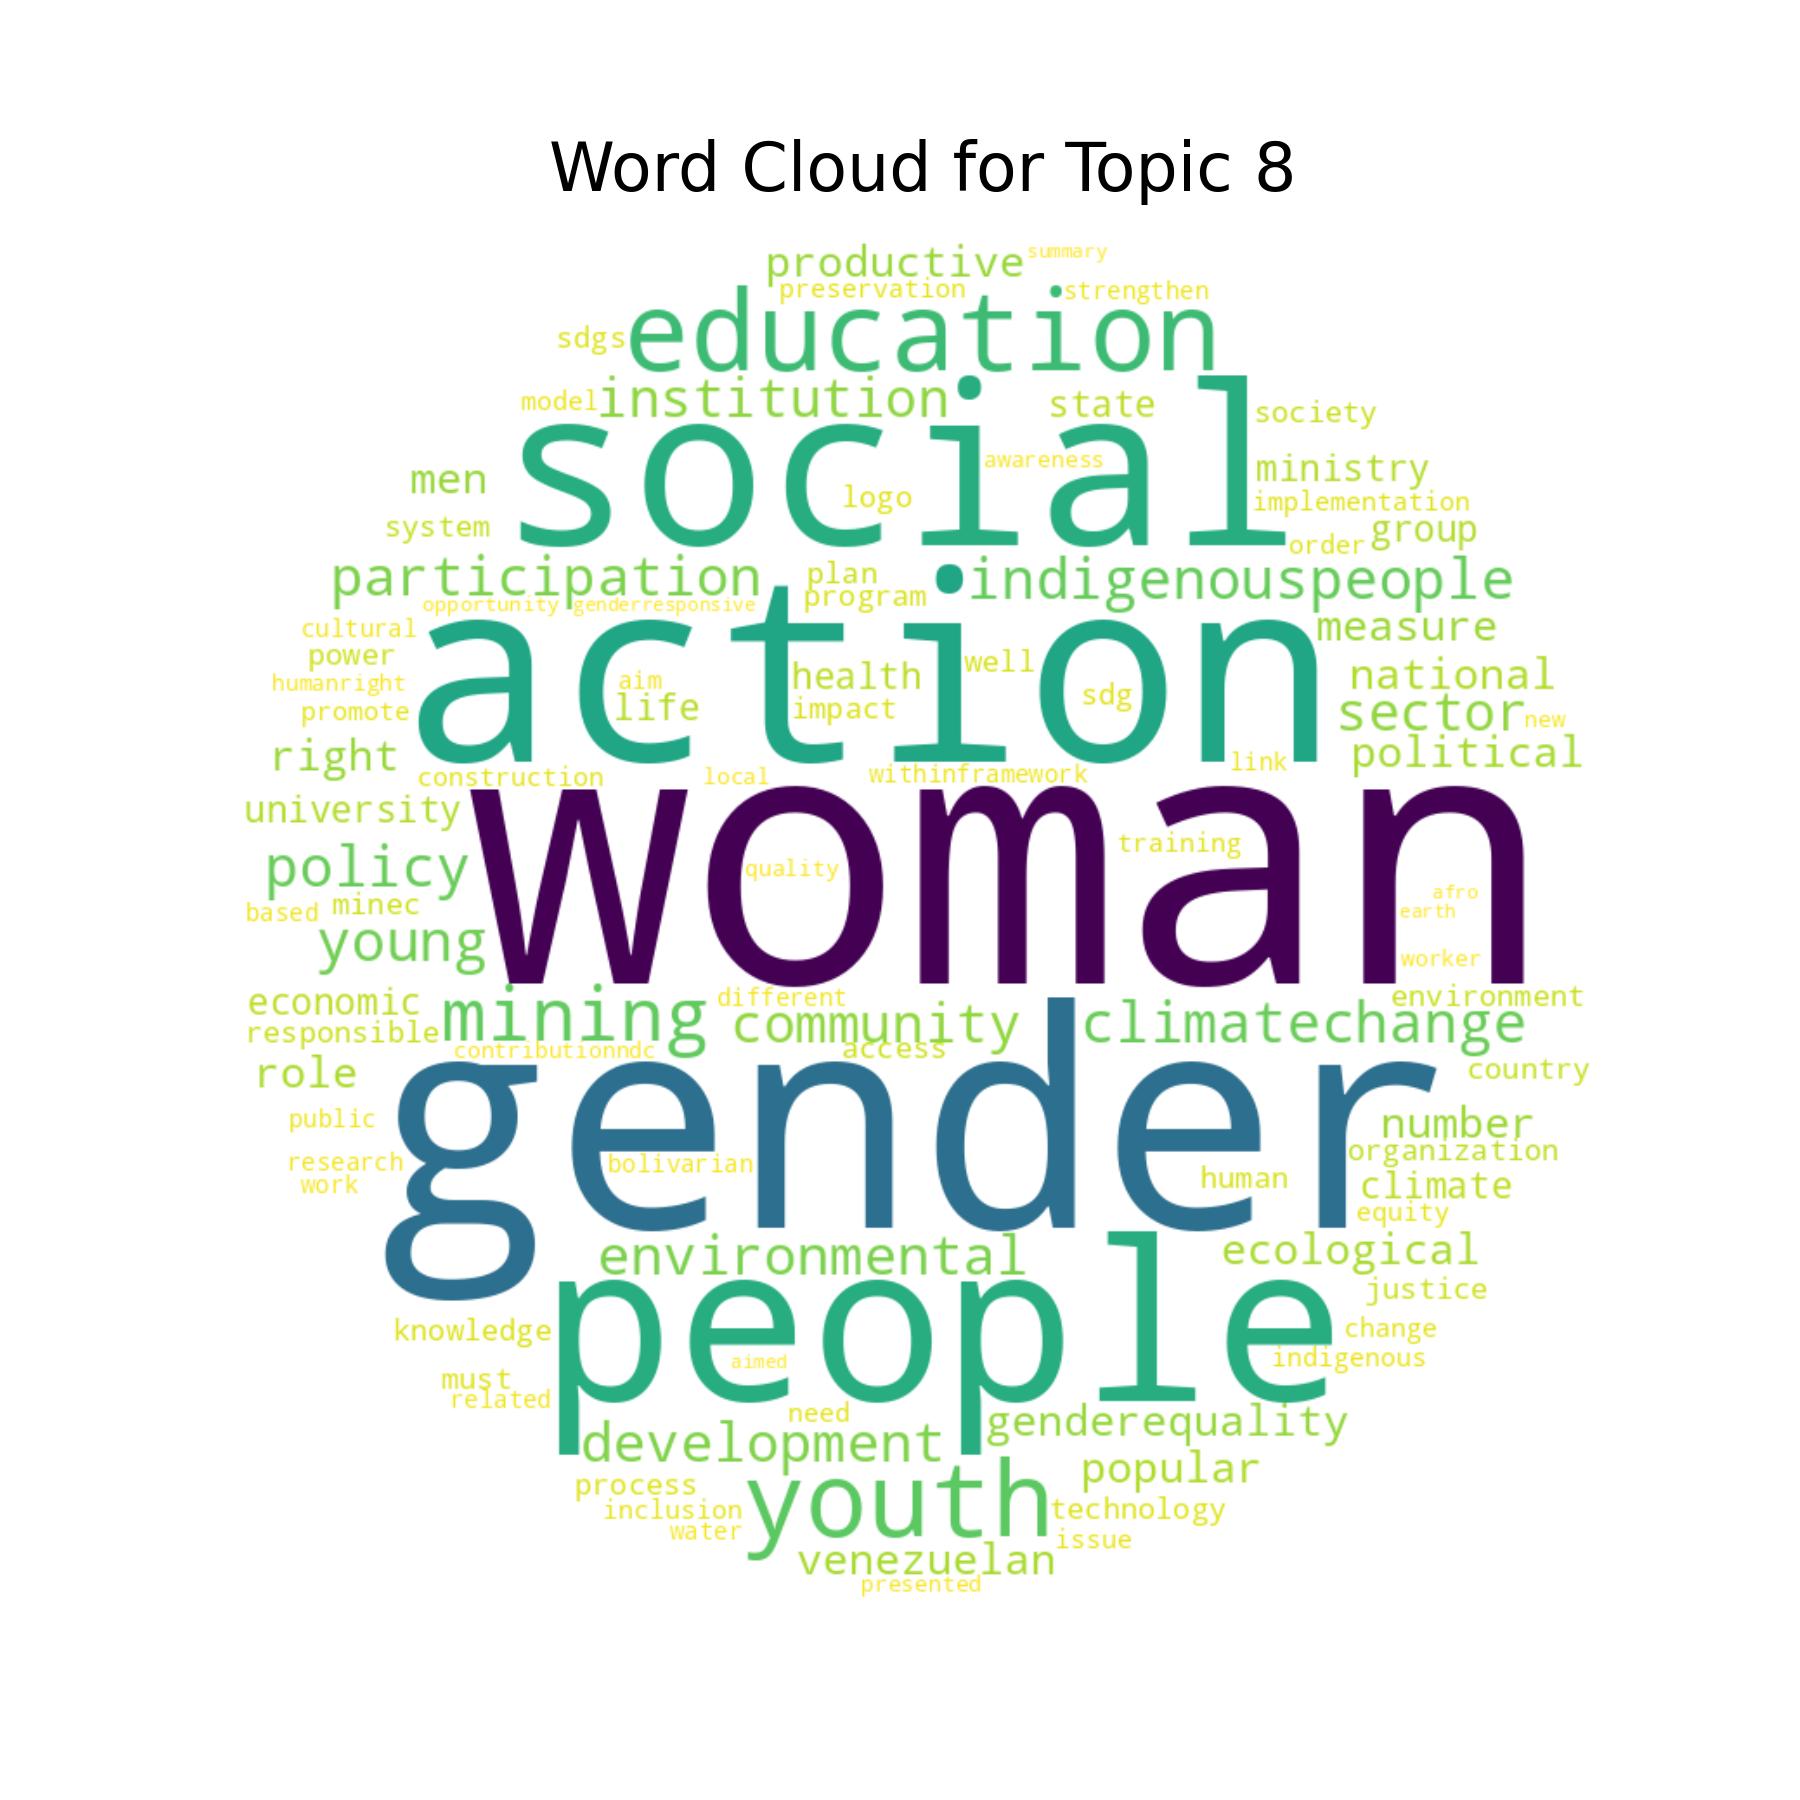 | T14: Carbon and forest economy  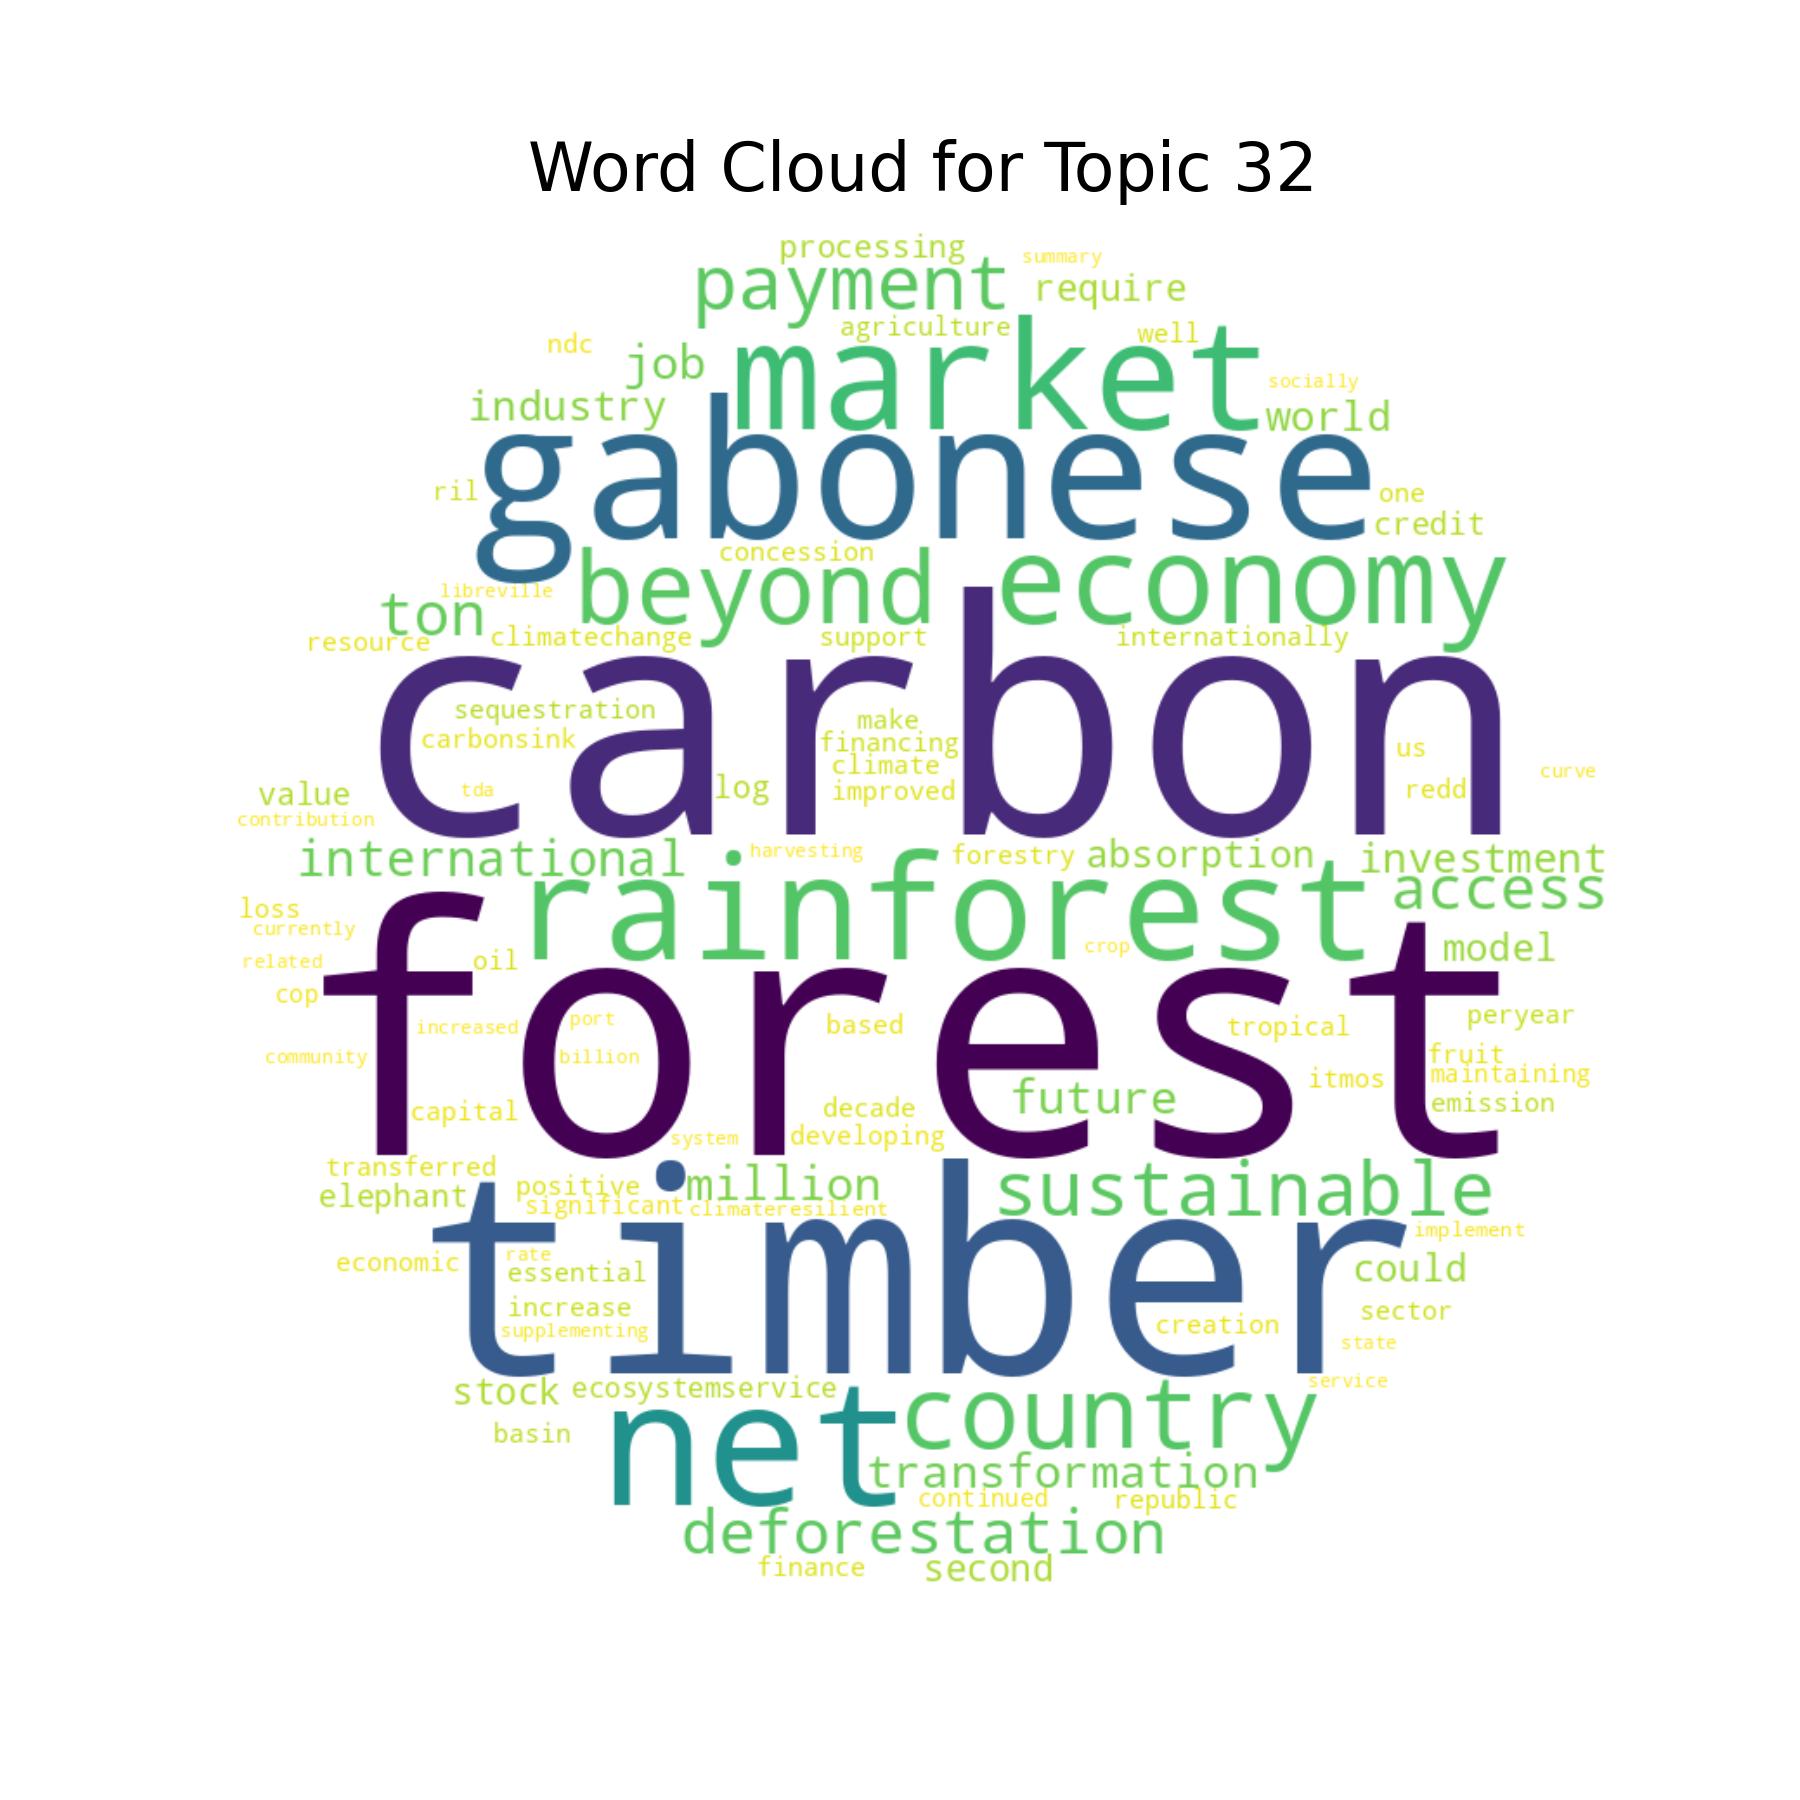 | T15: Climate finance  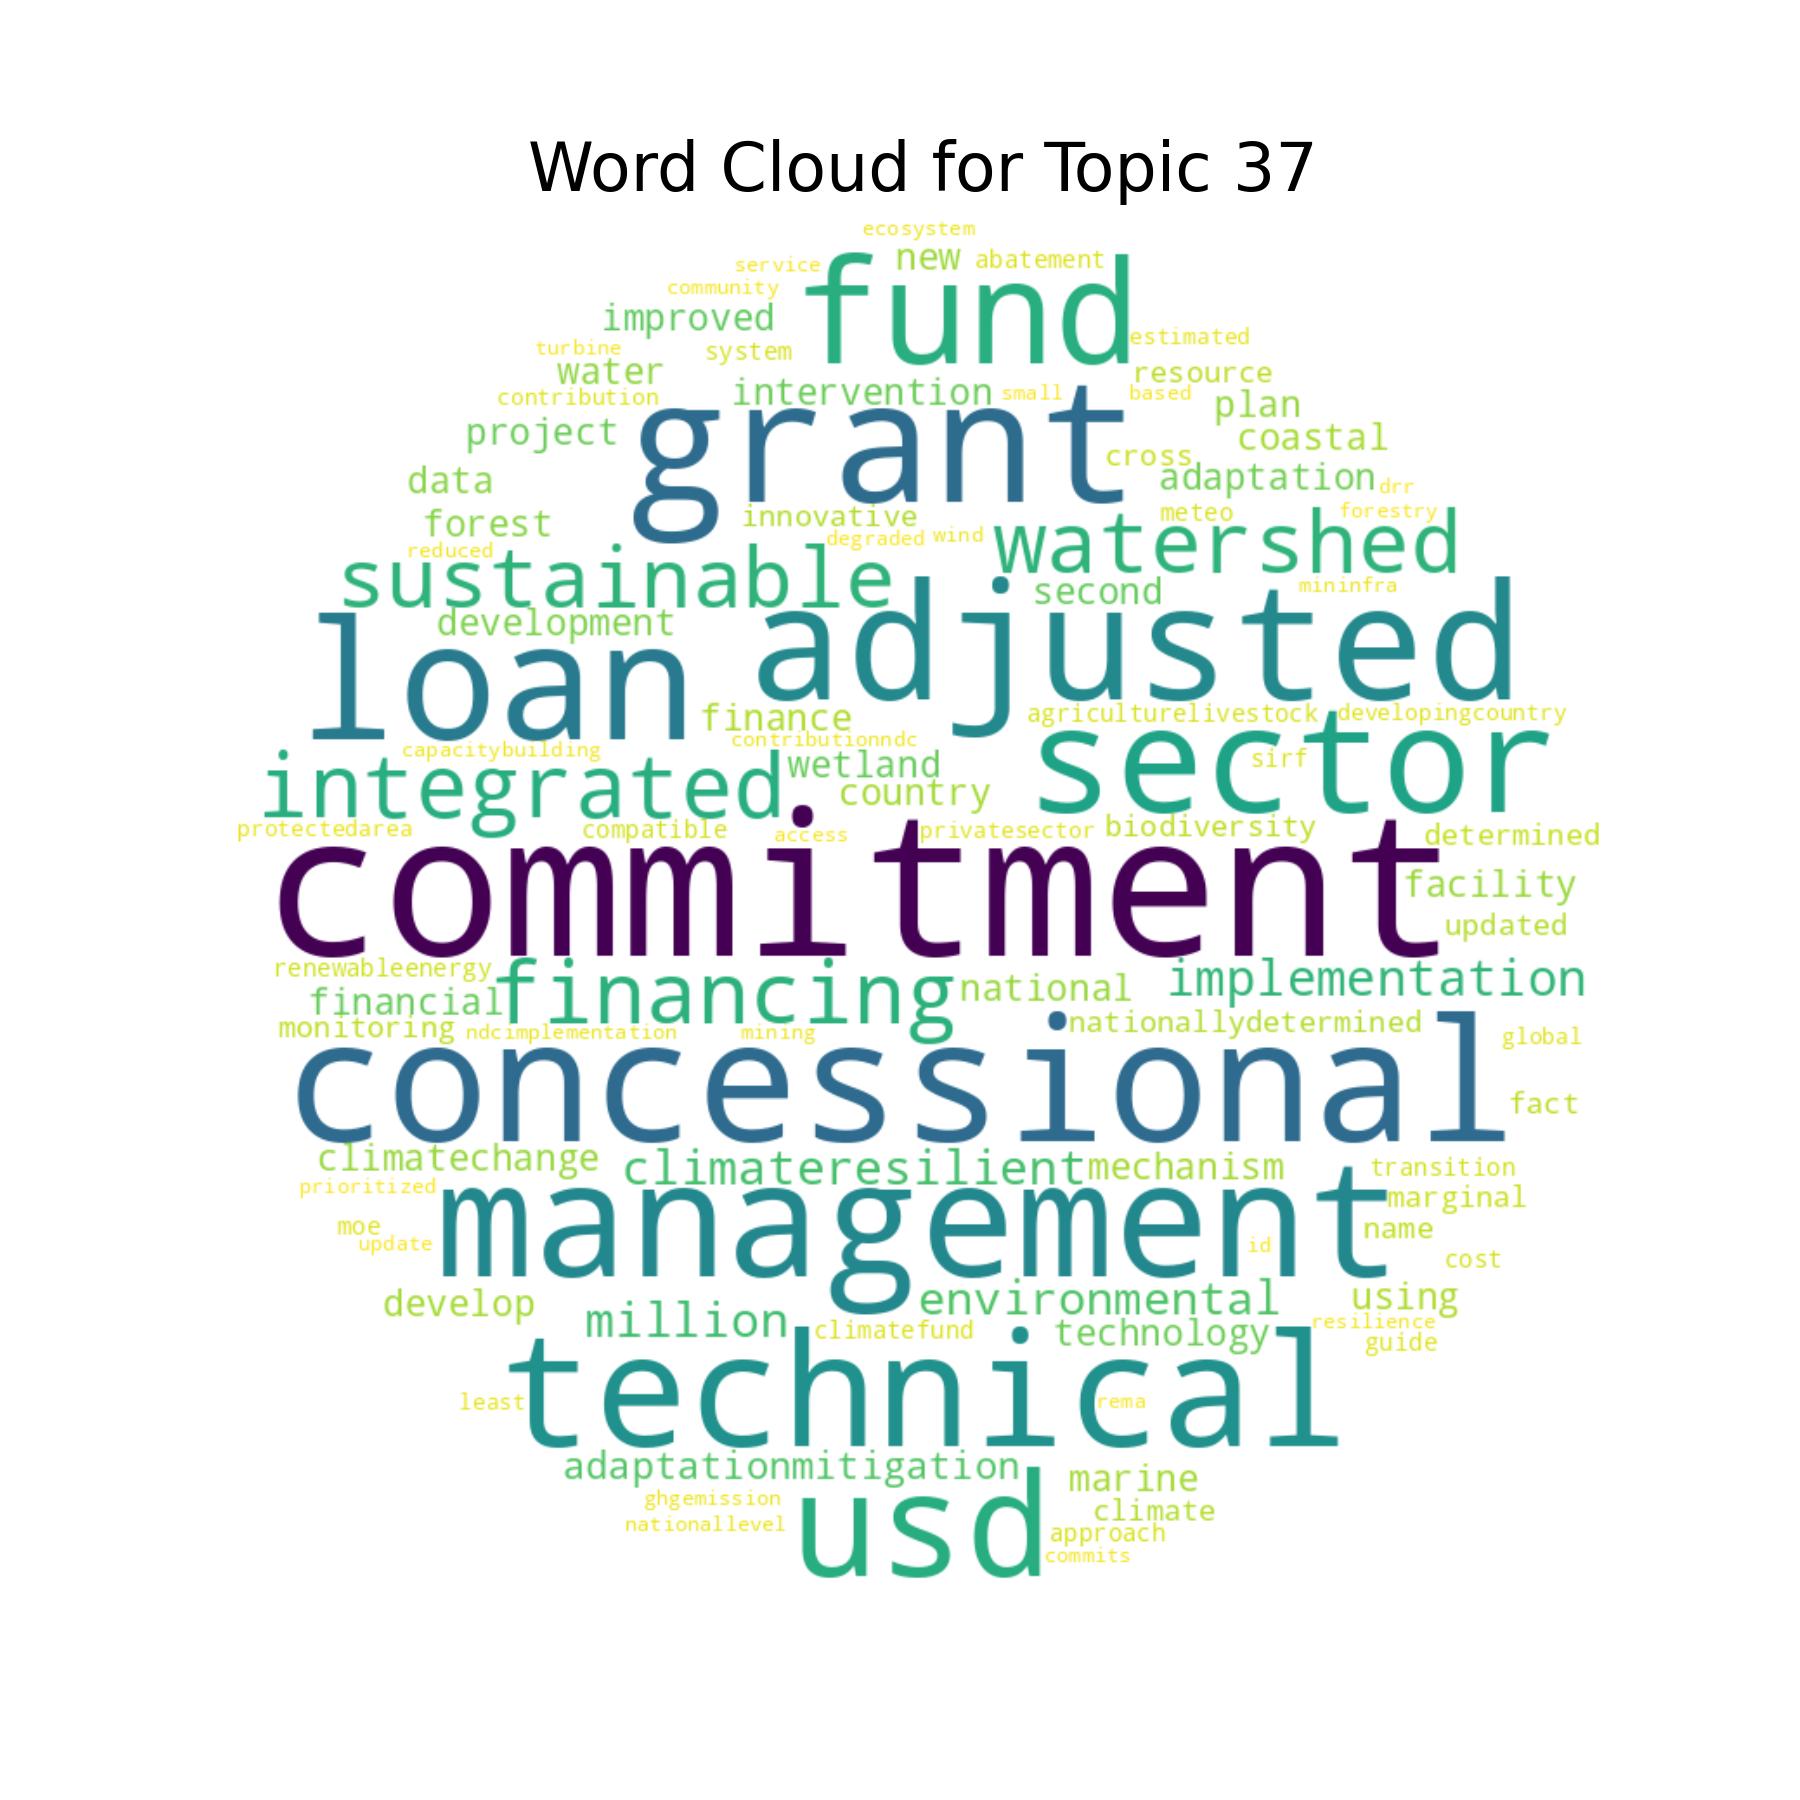 | T16: Government official sources  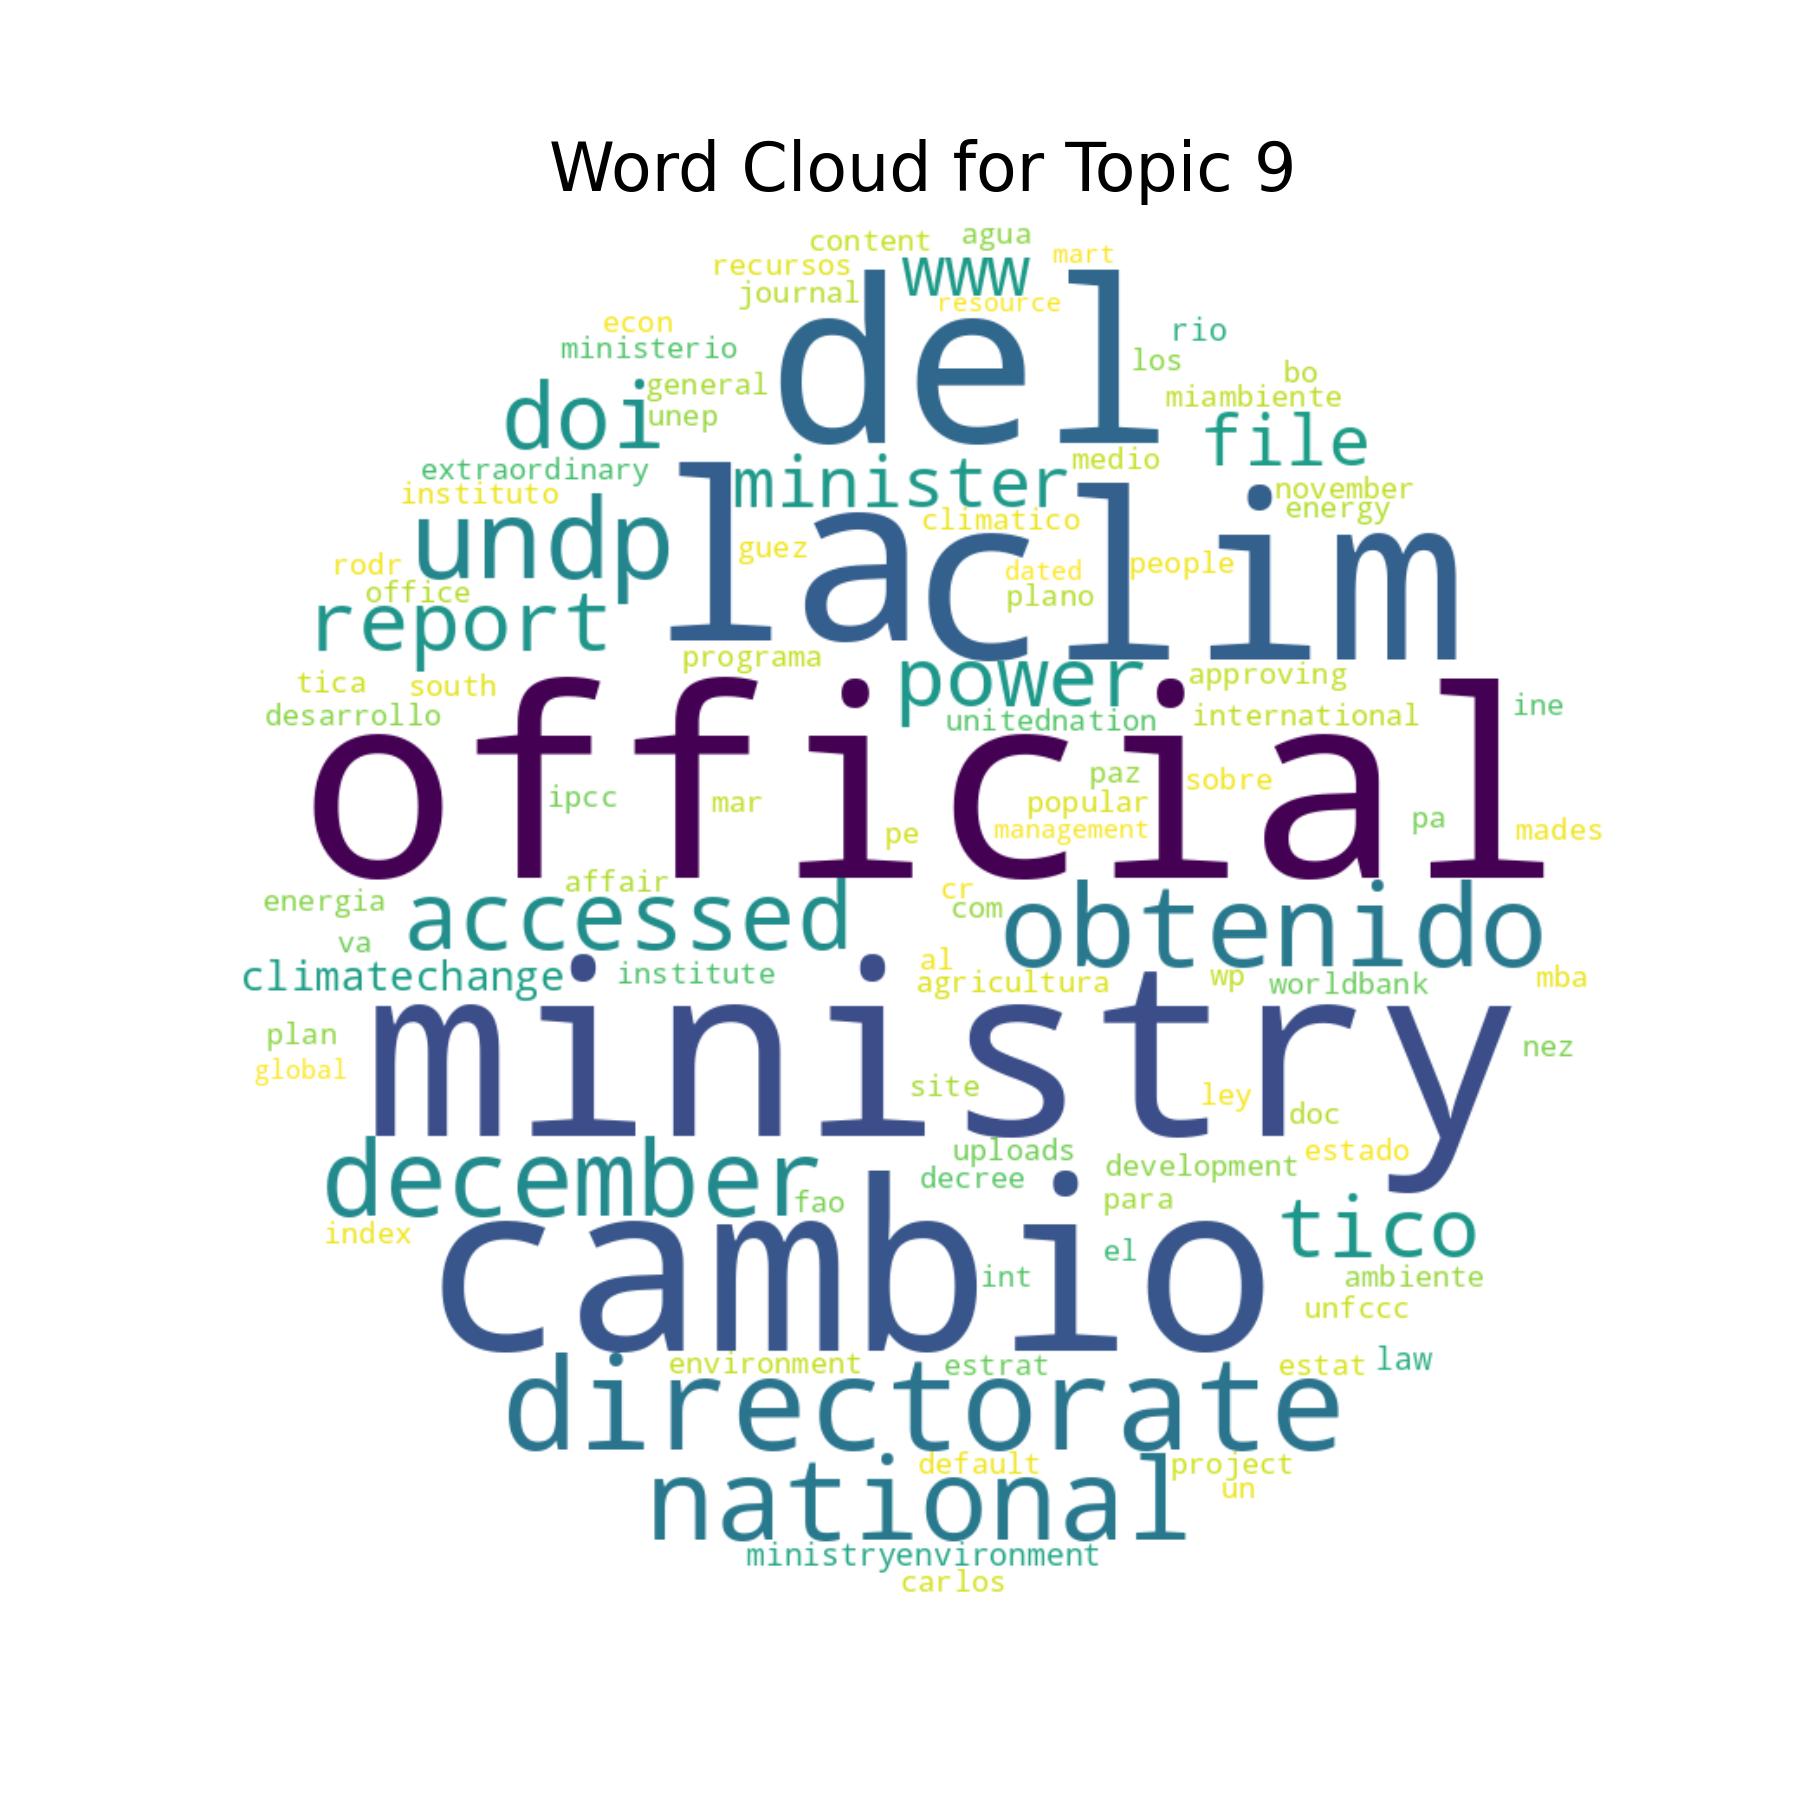 |
| T17: Resource extraction  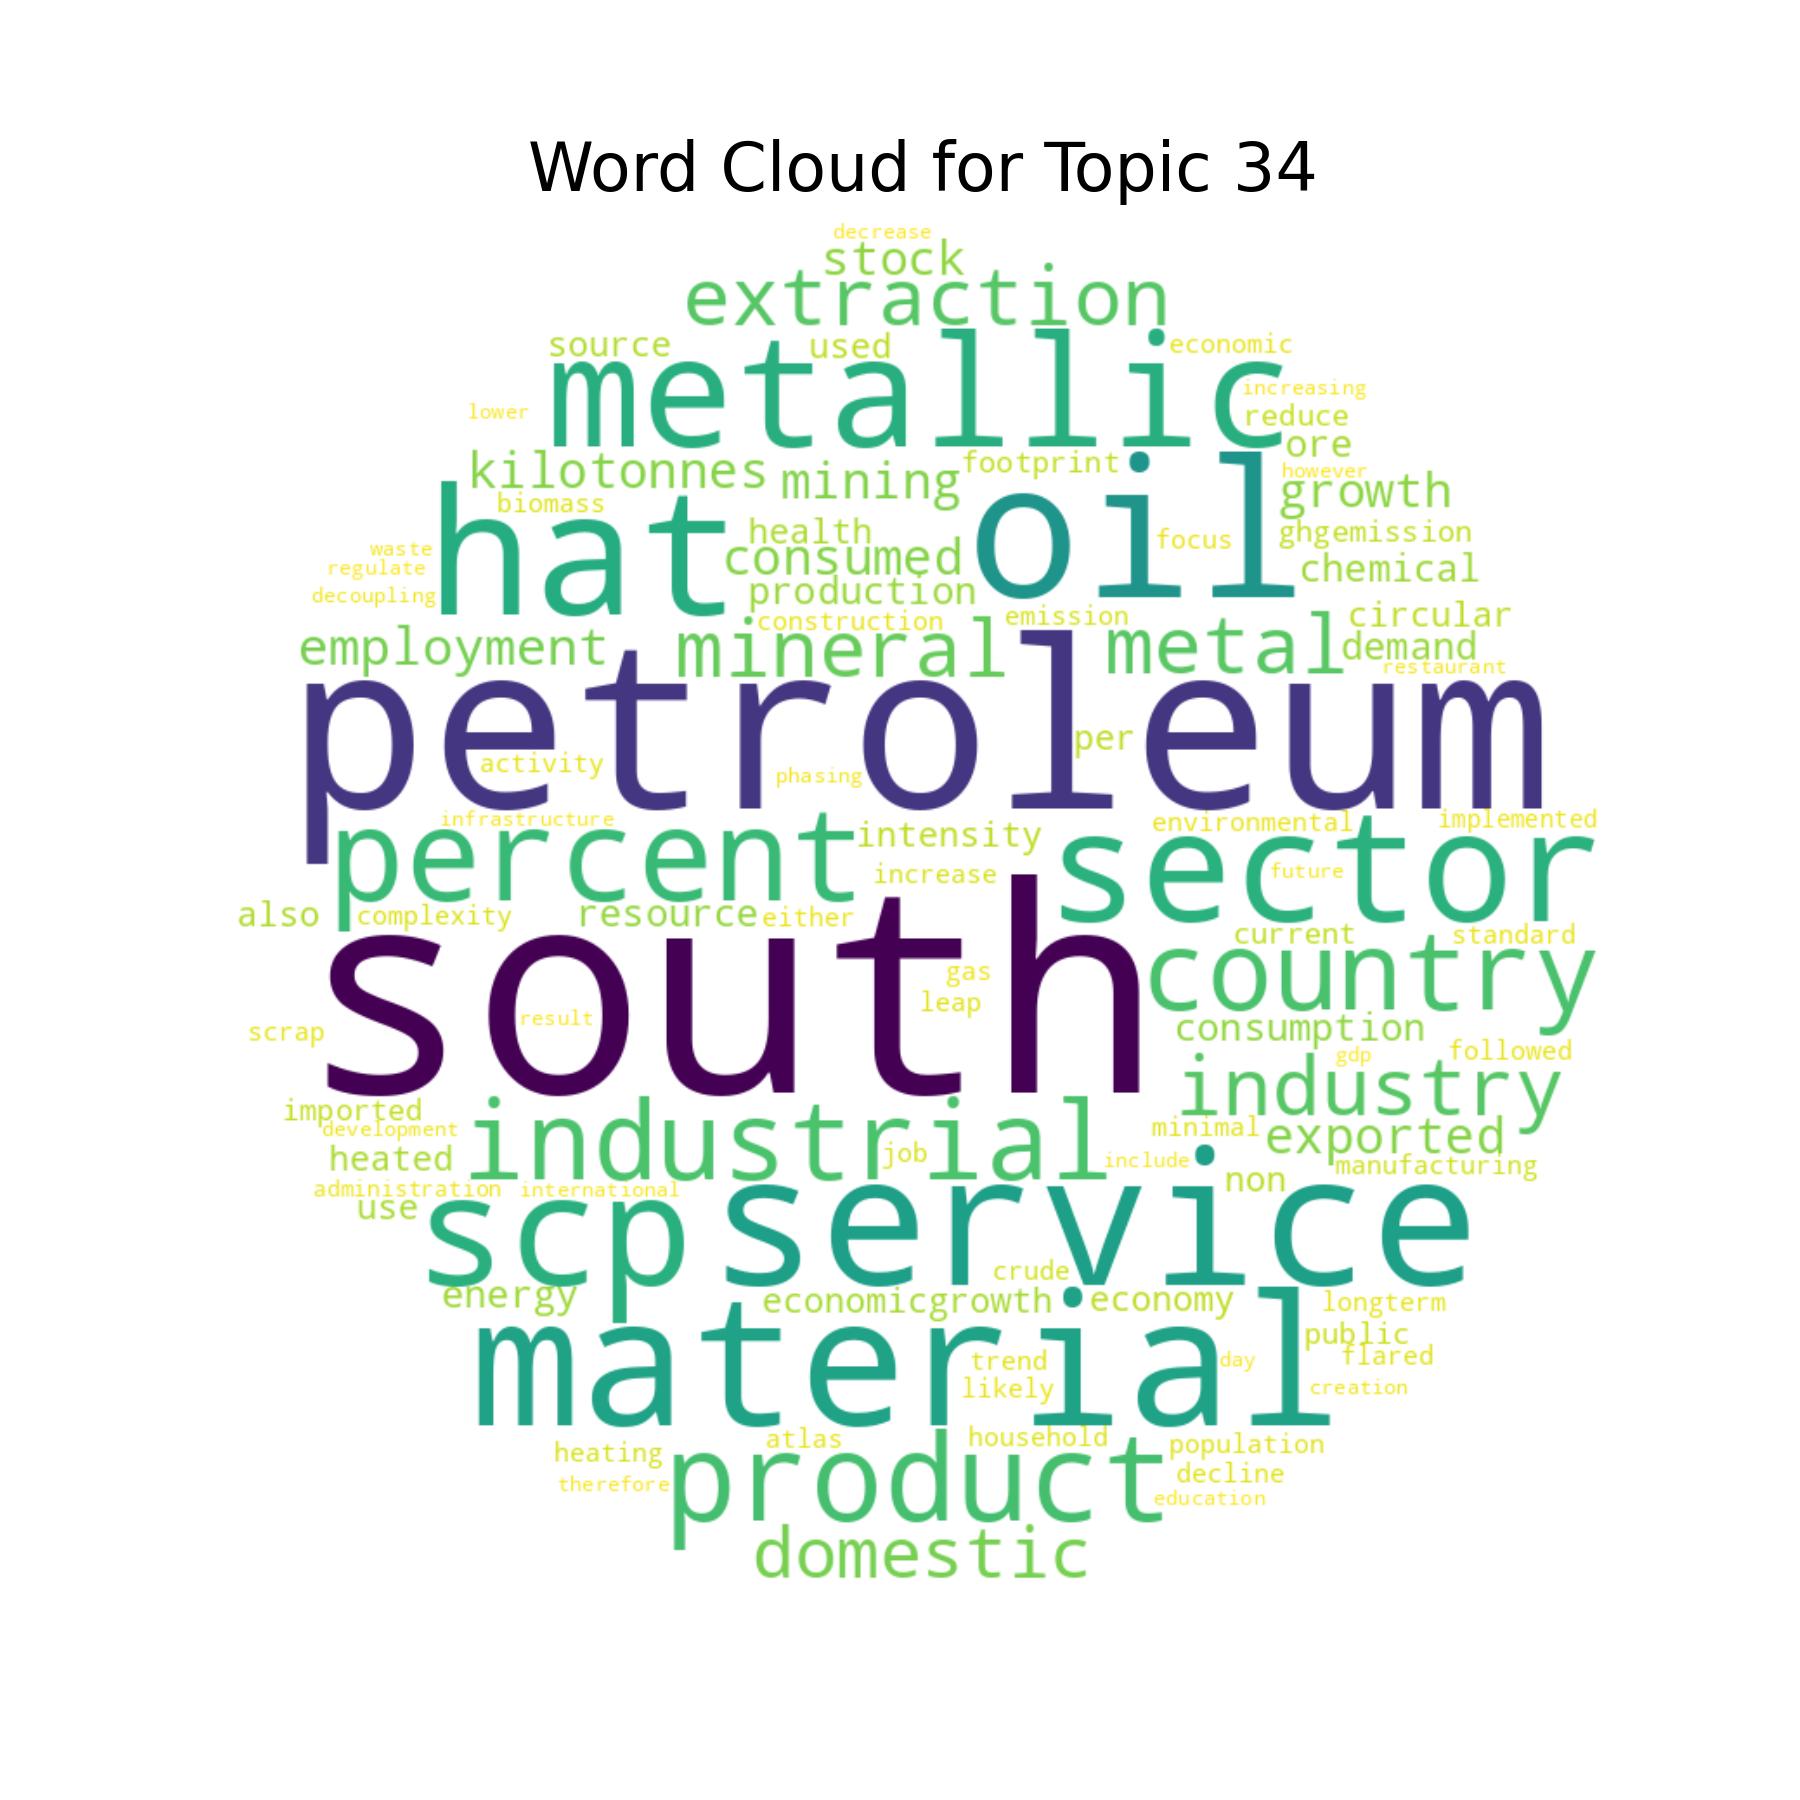 | T18: Public transport systems  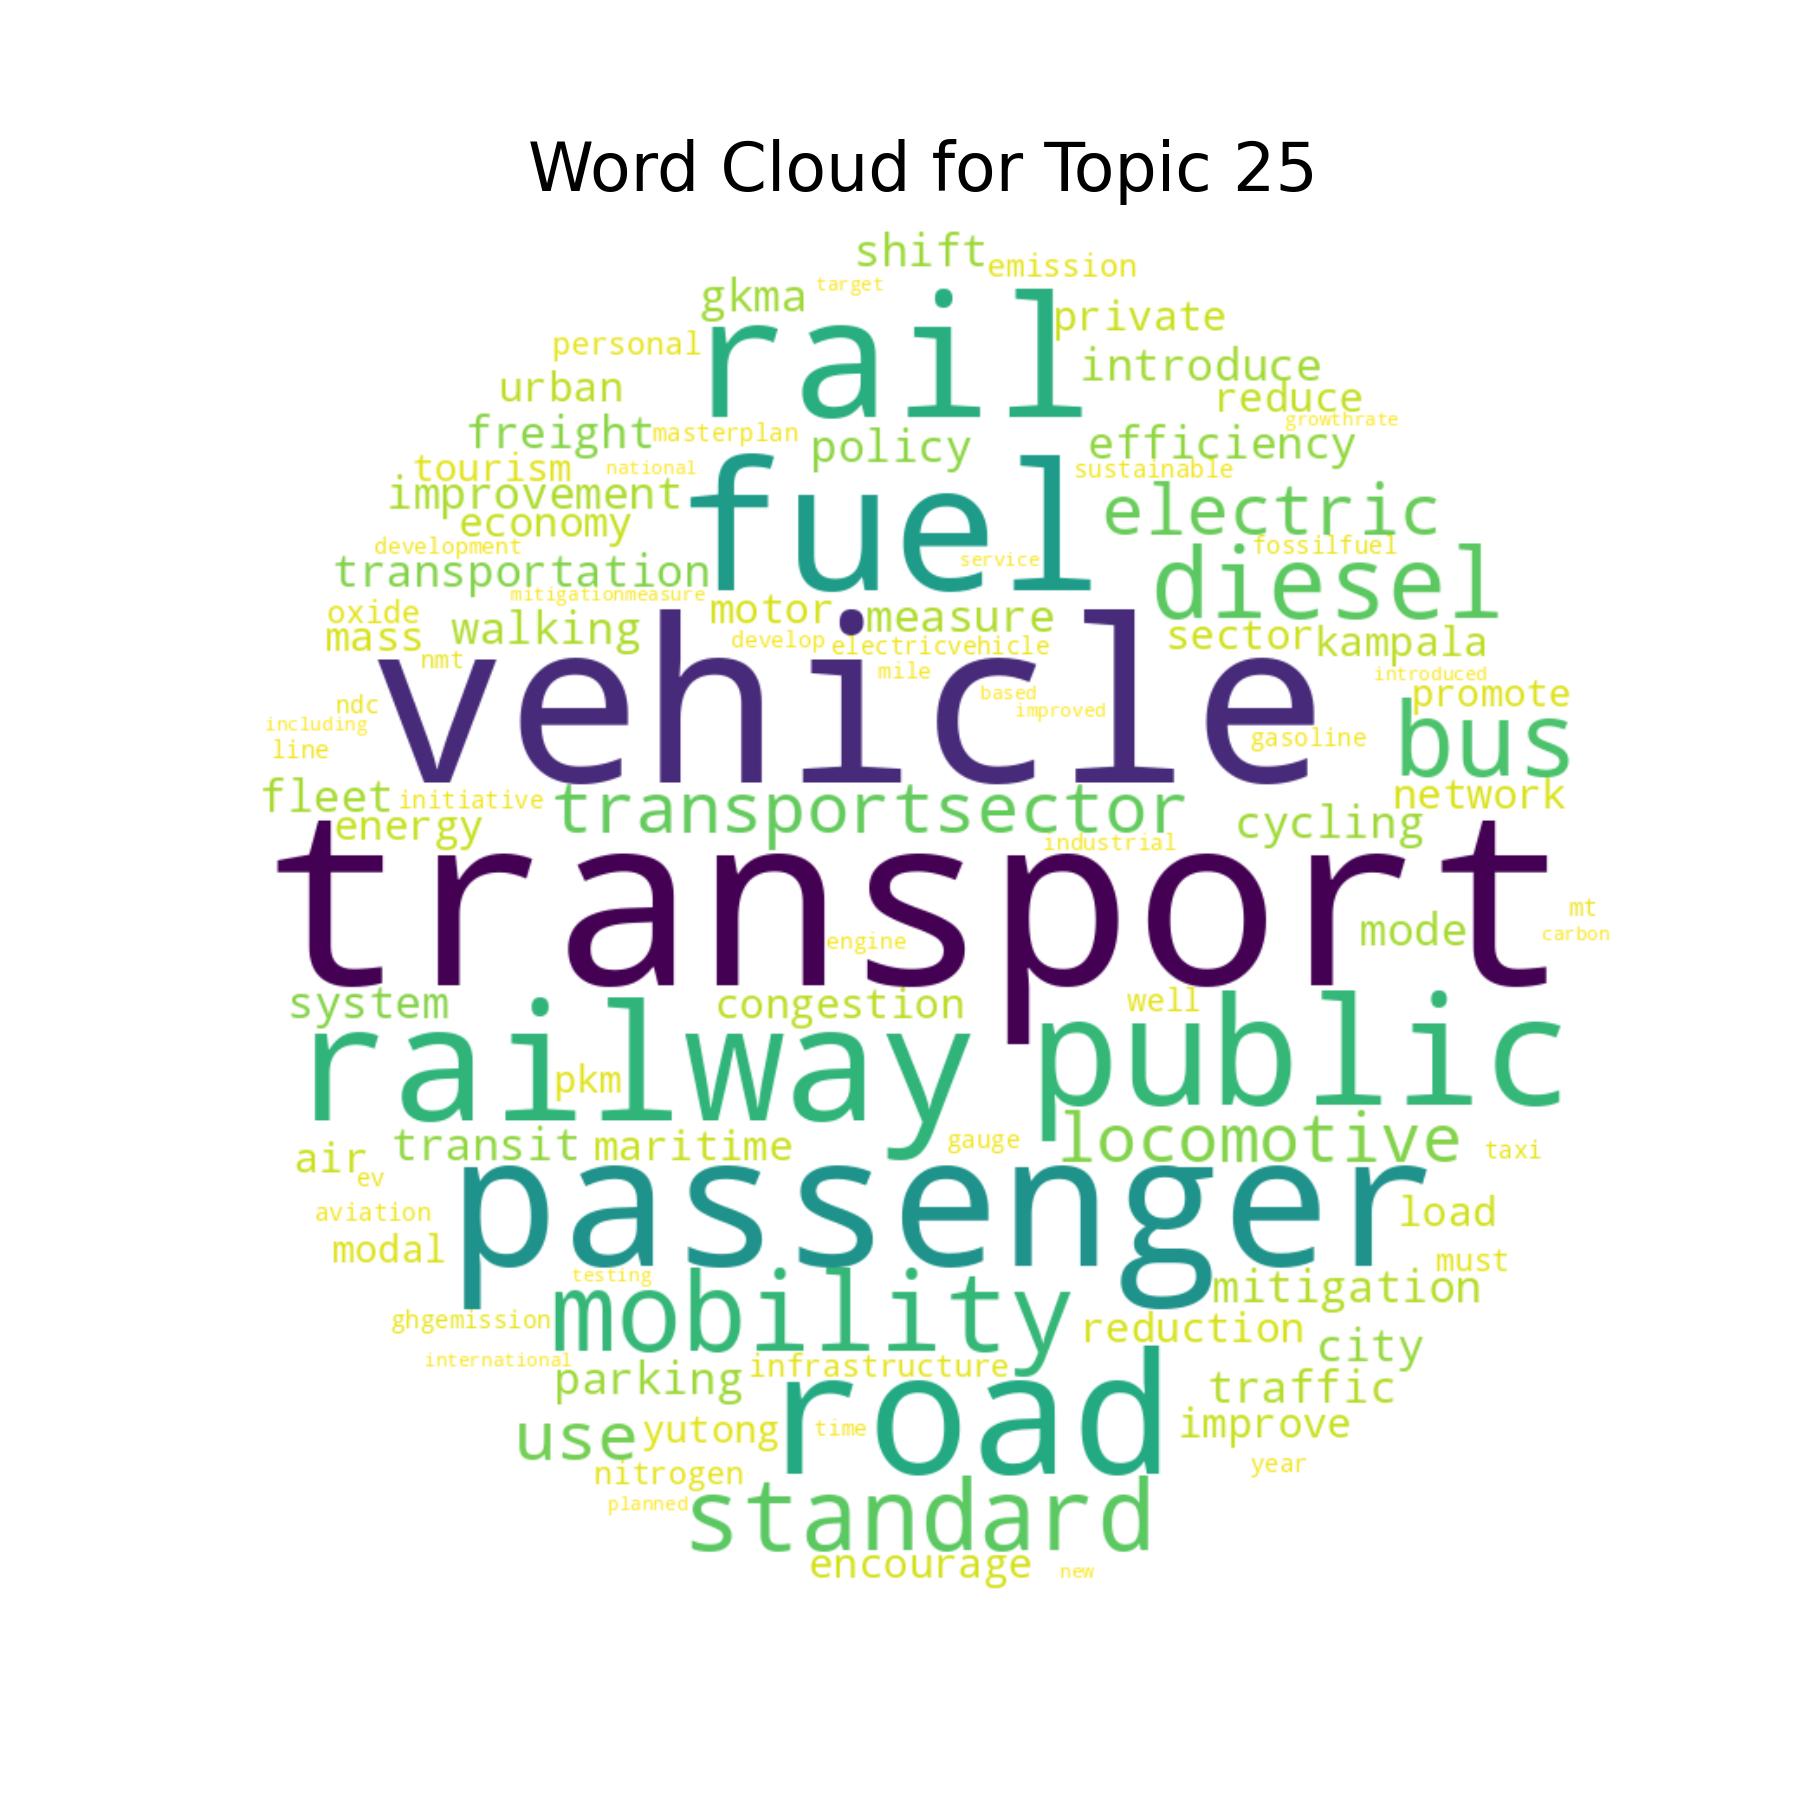 | T19: Sectoral emission mitigation  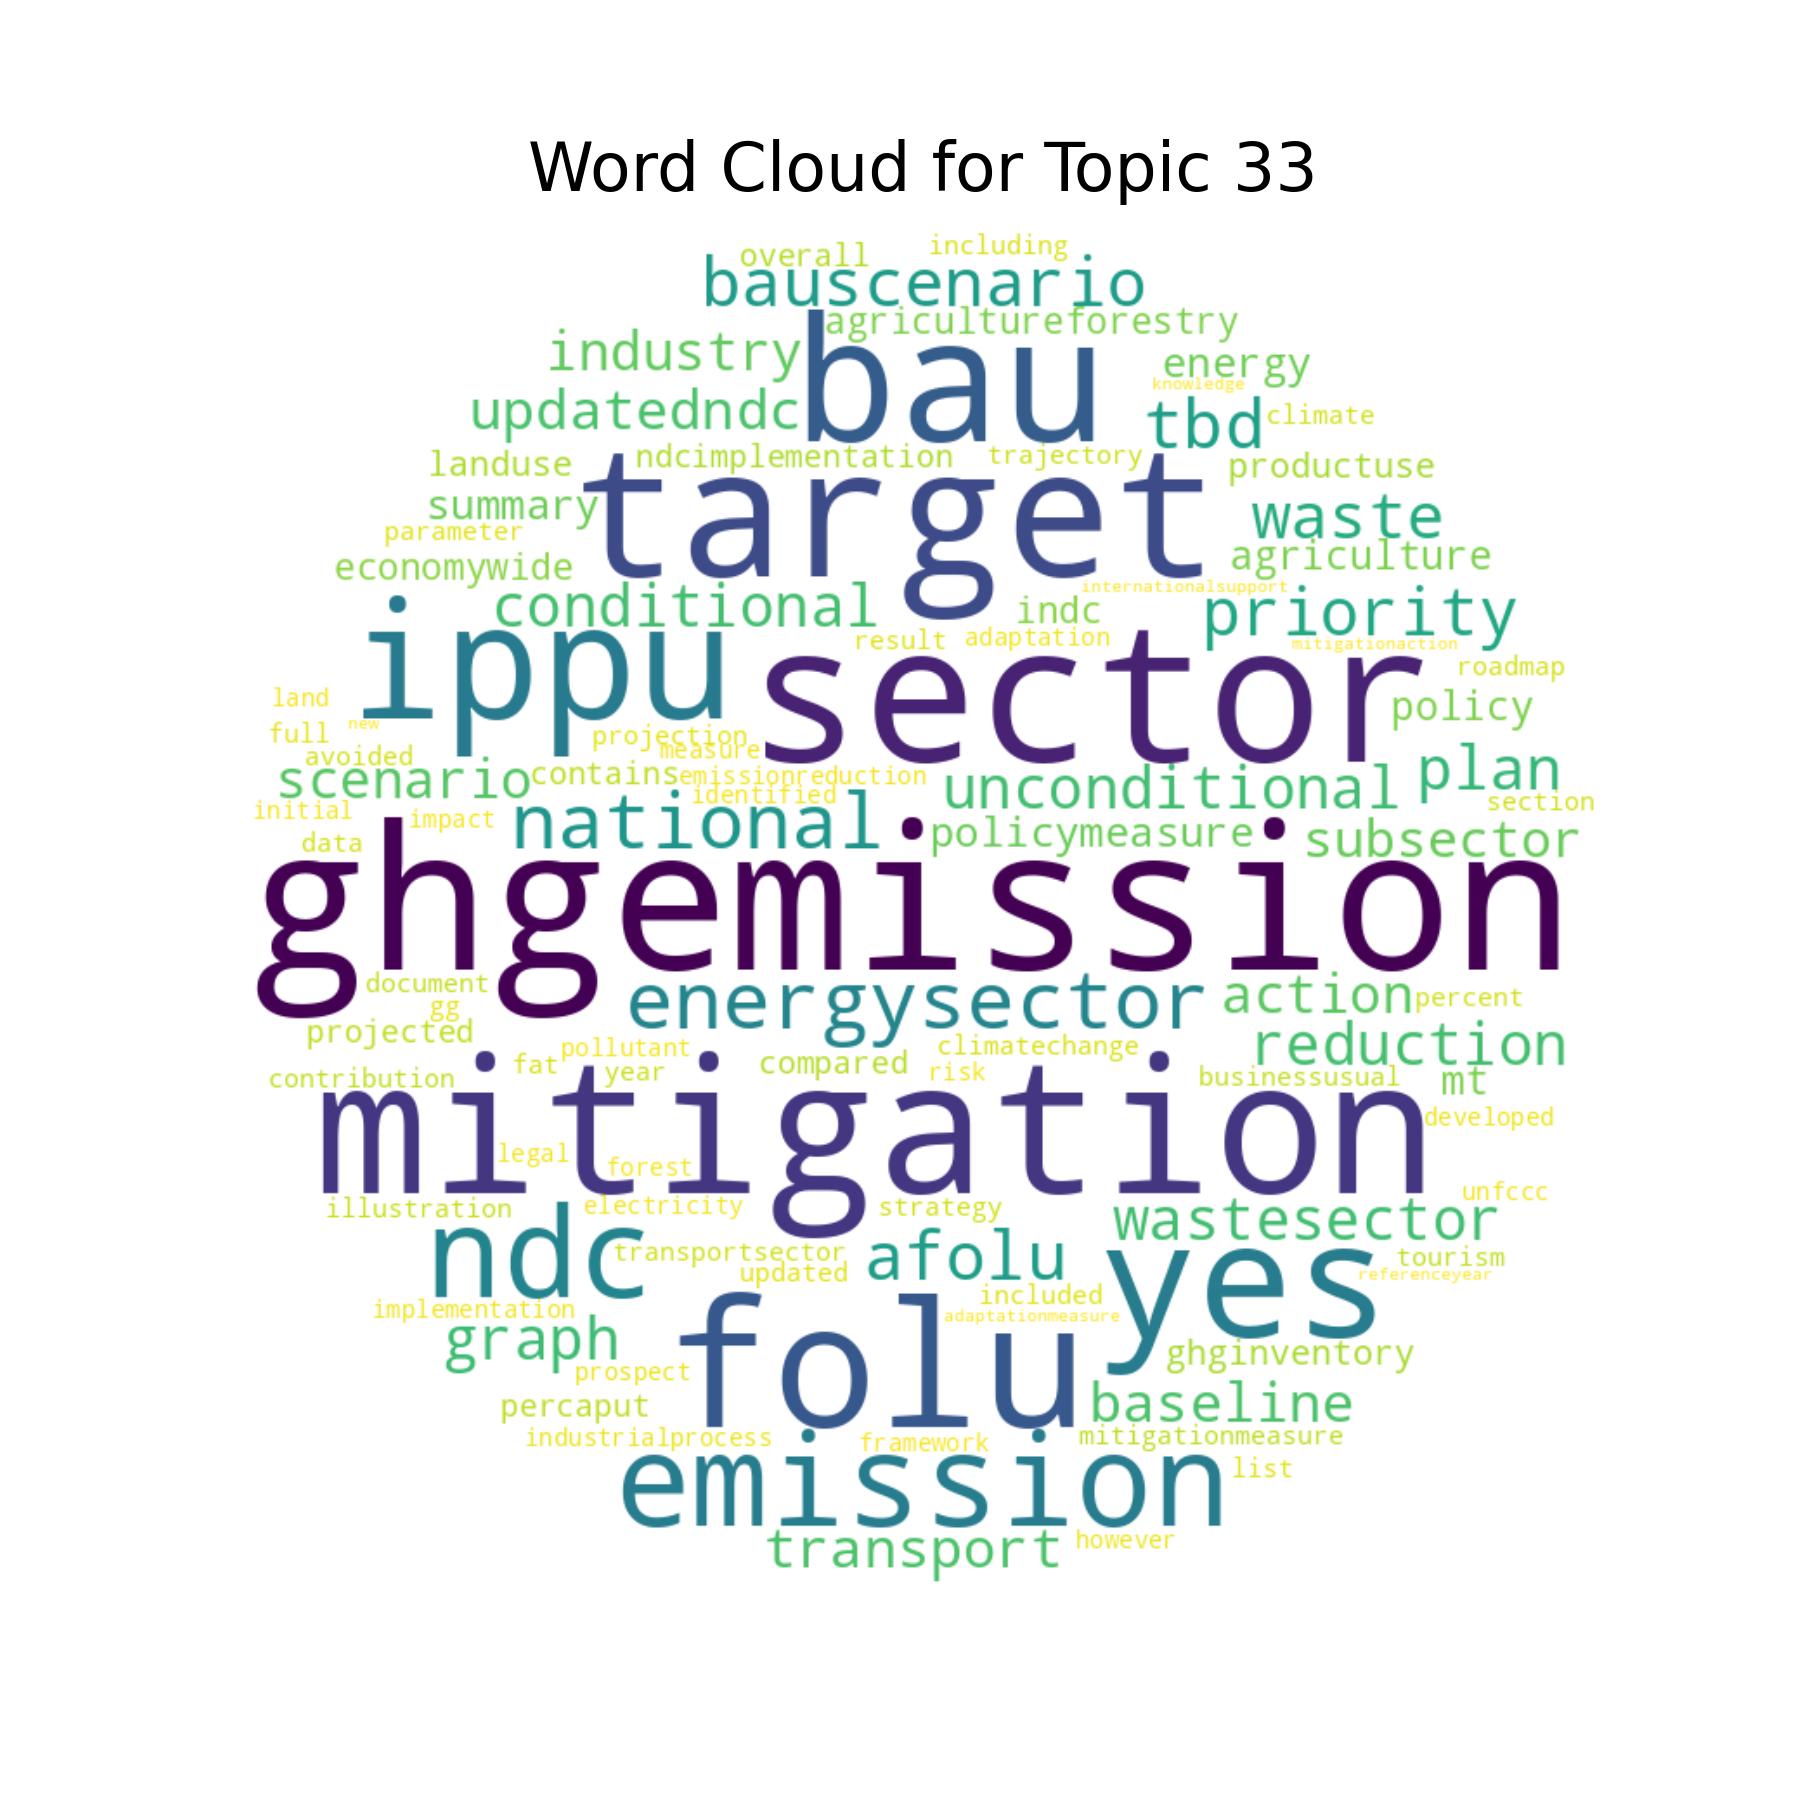 | T20: Freight and transportation  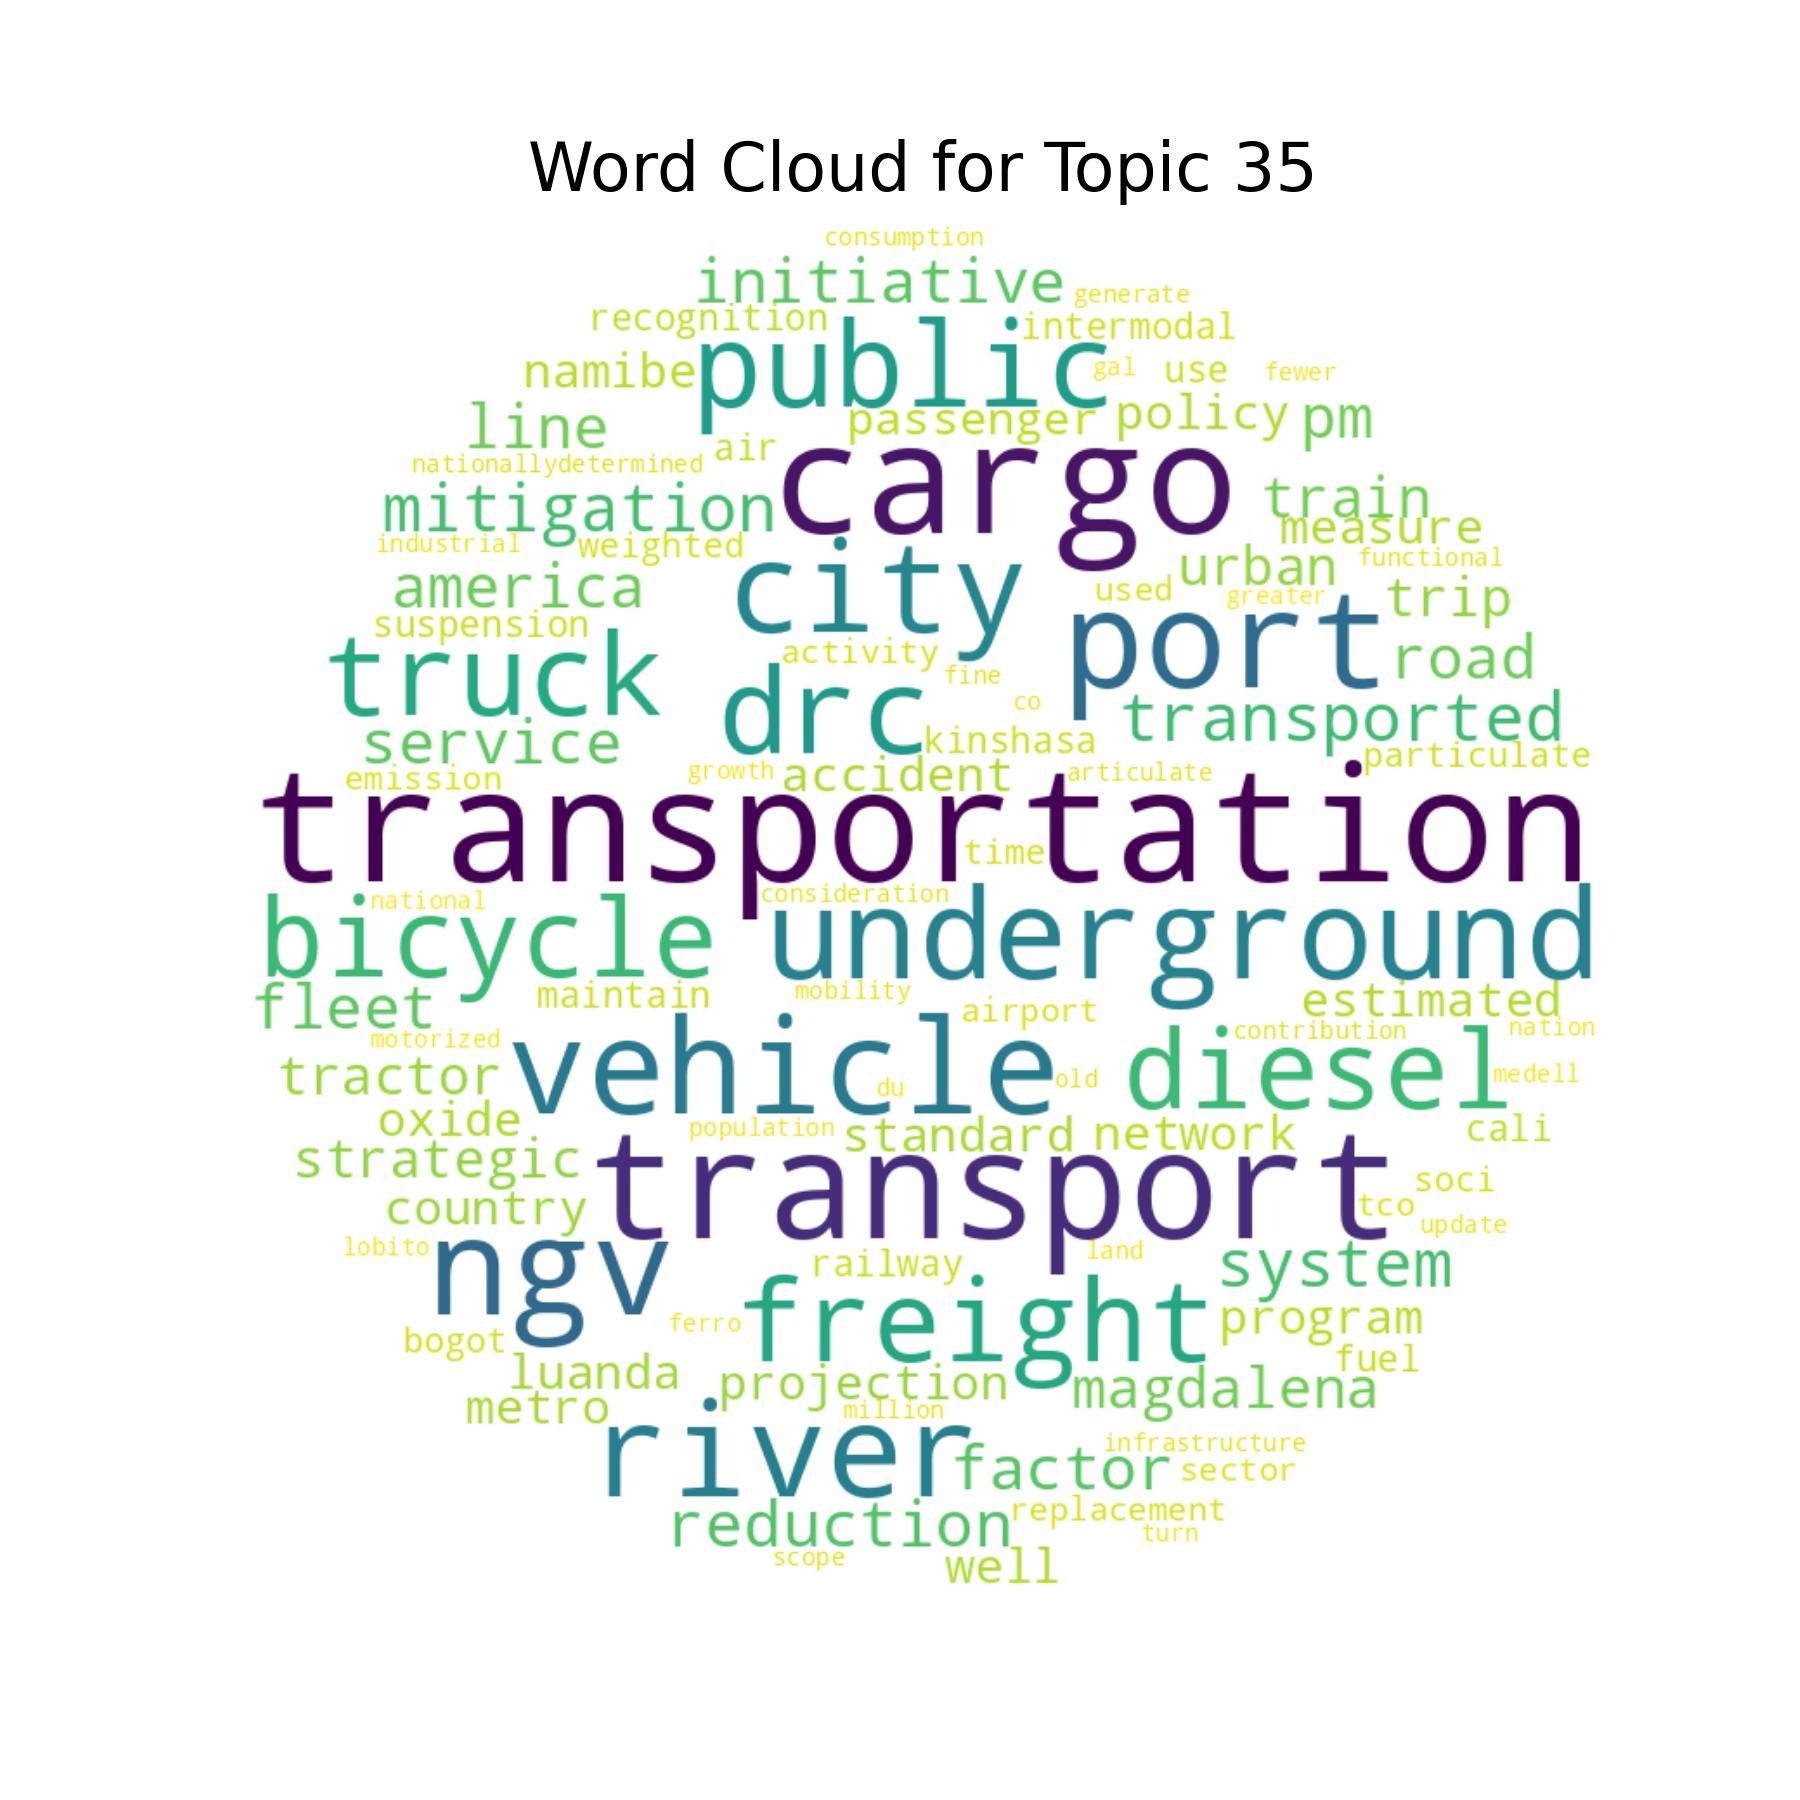 | T21: MRV systems  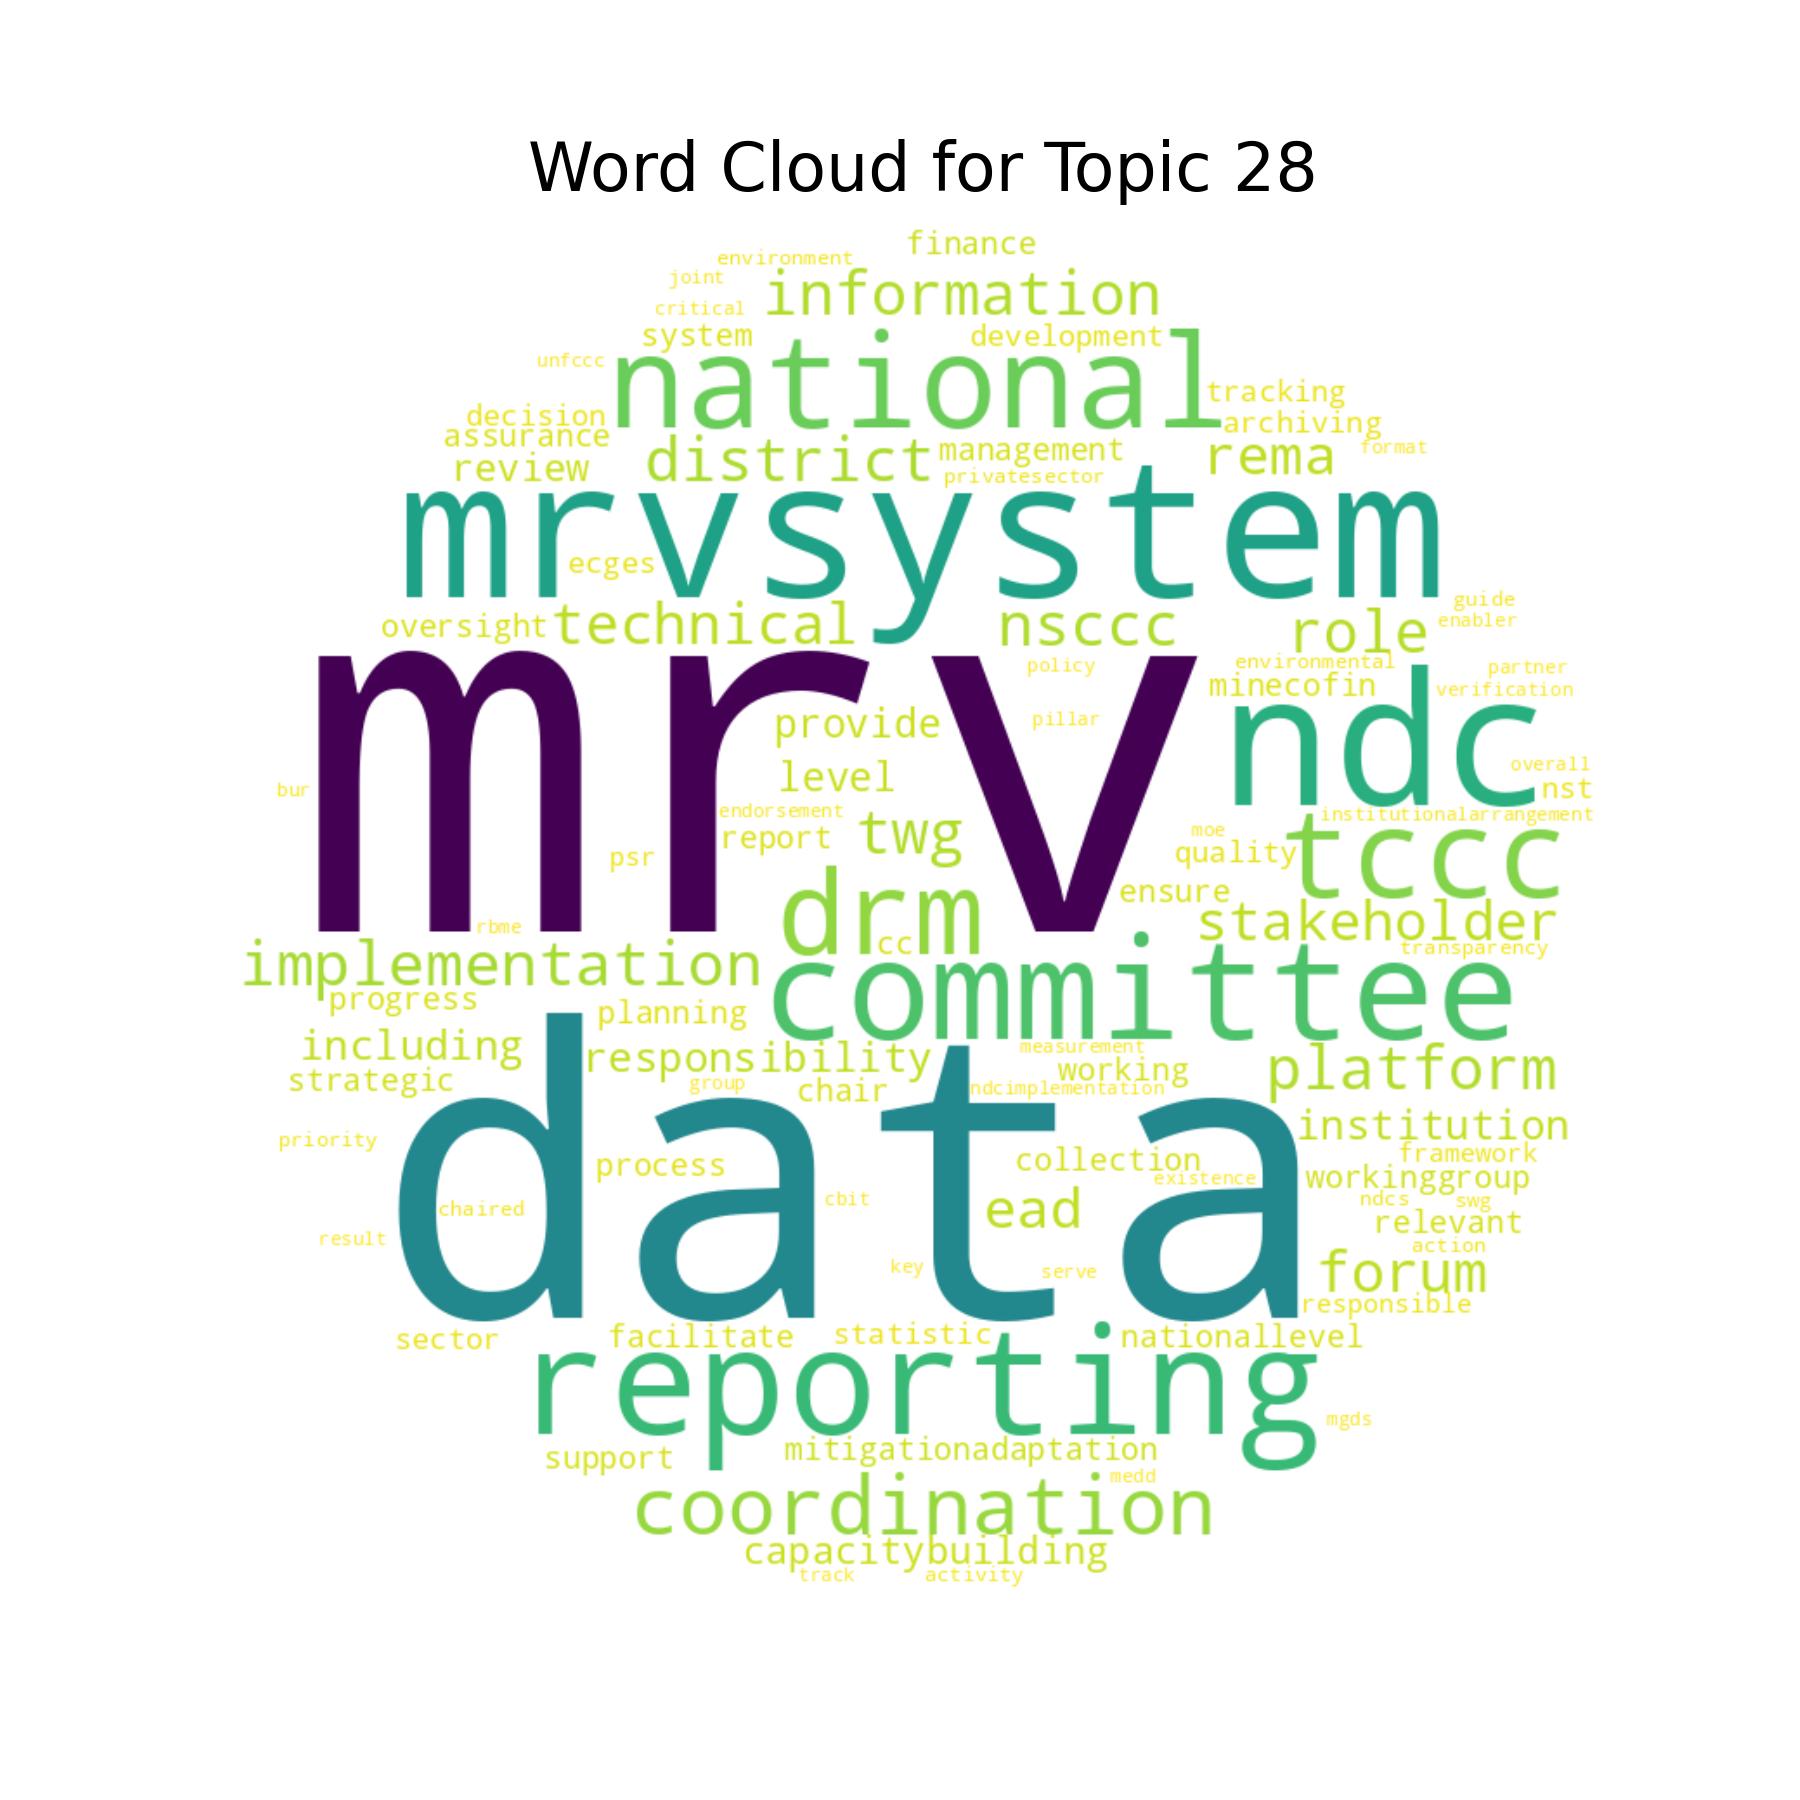 | T22: Youth and sustainability  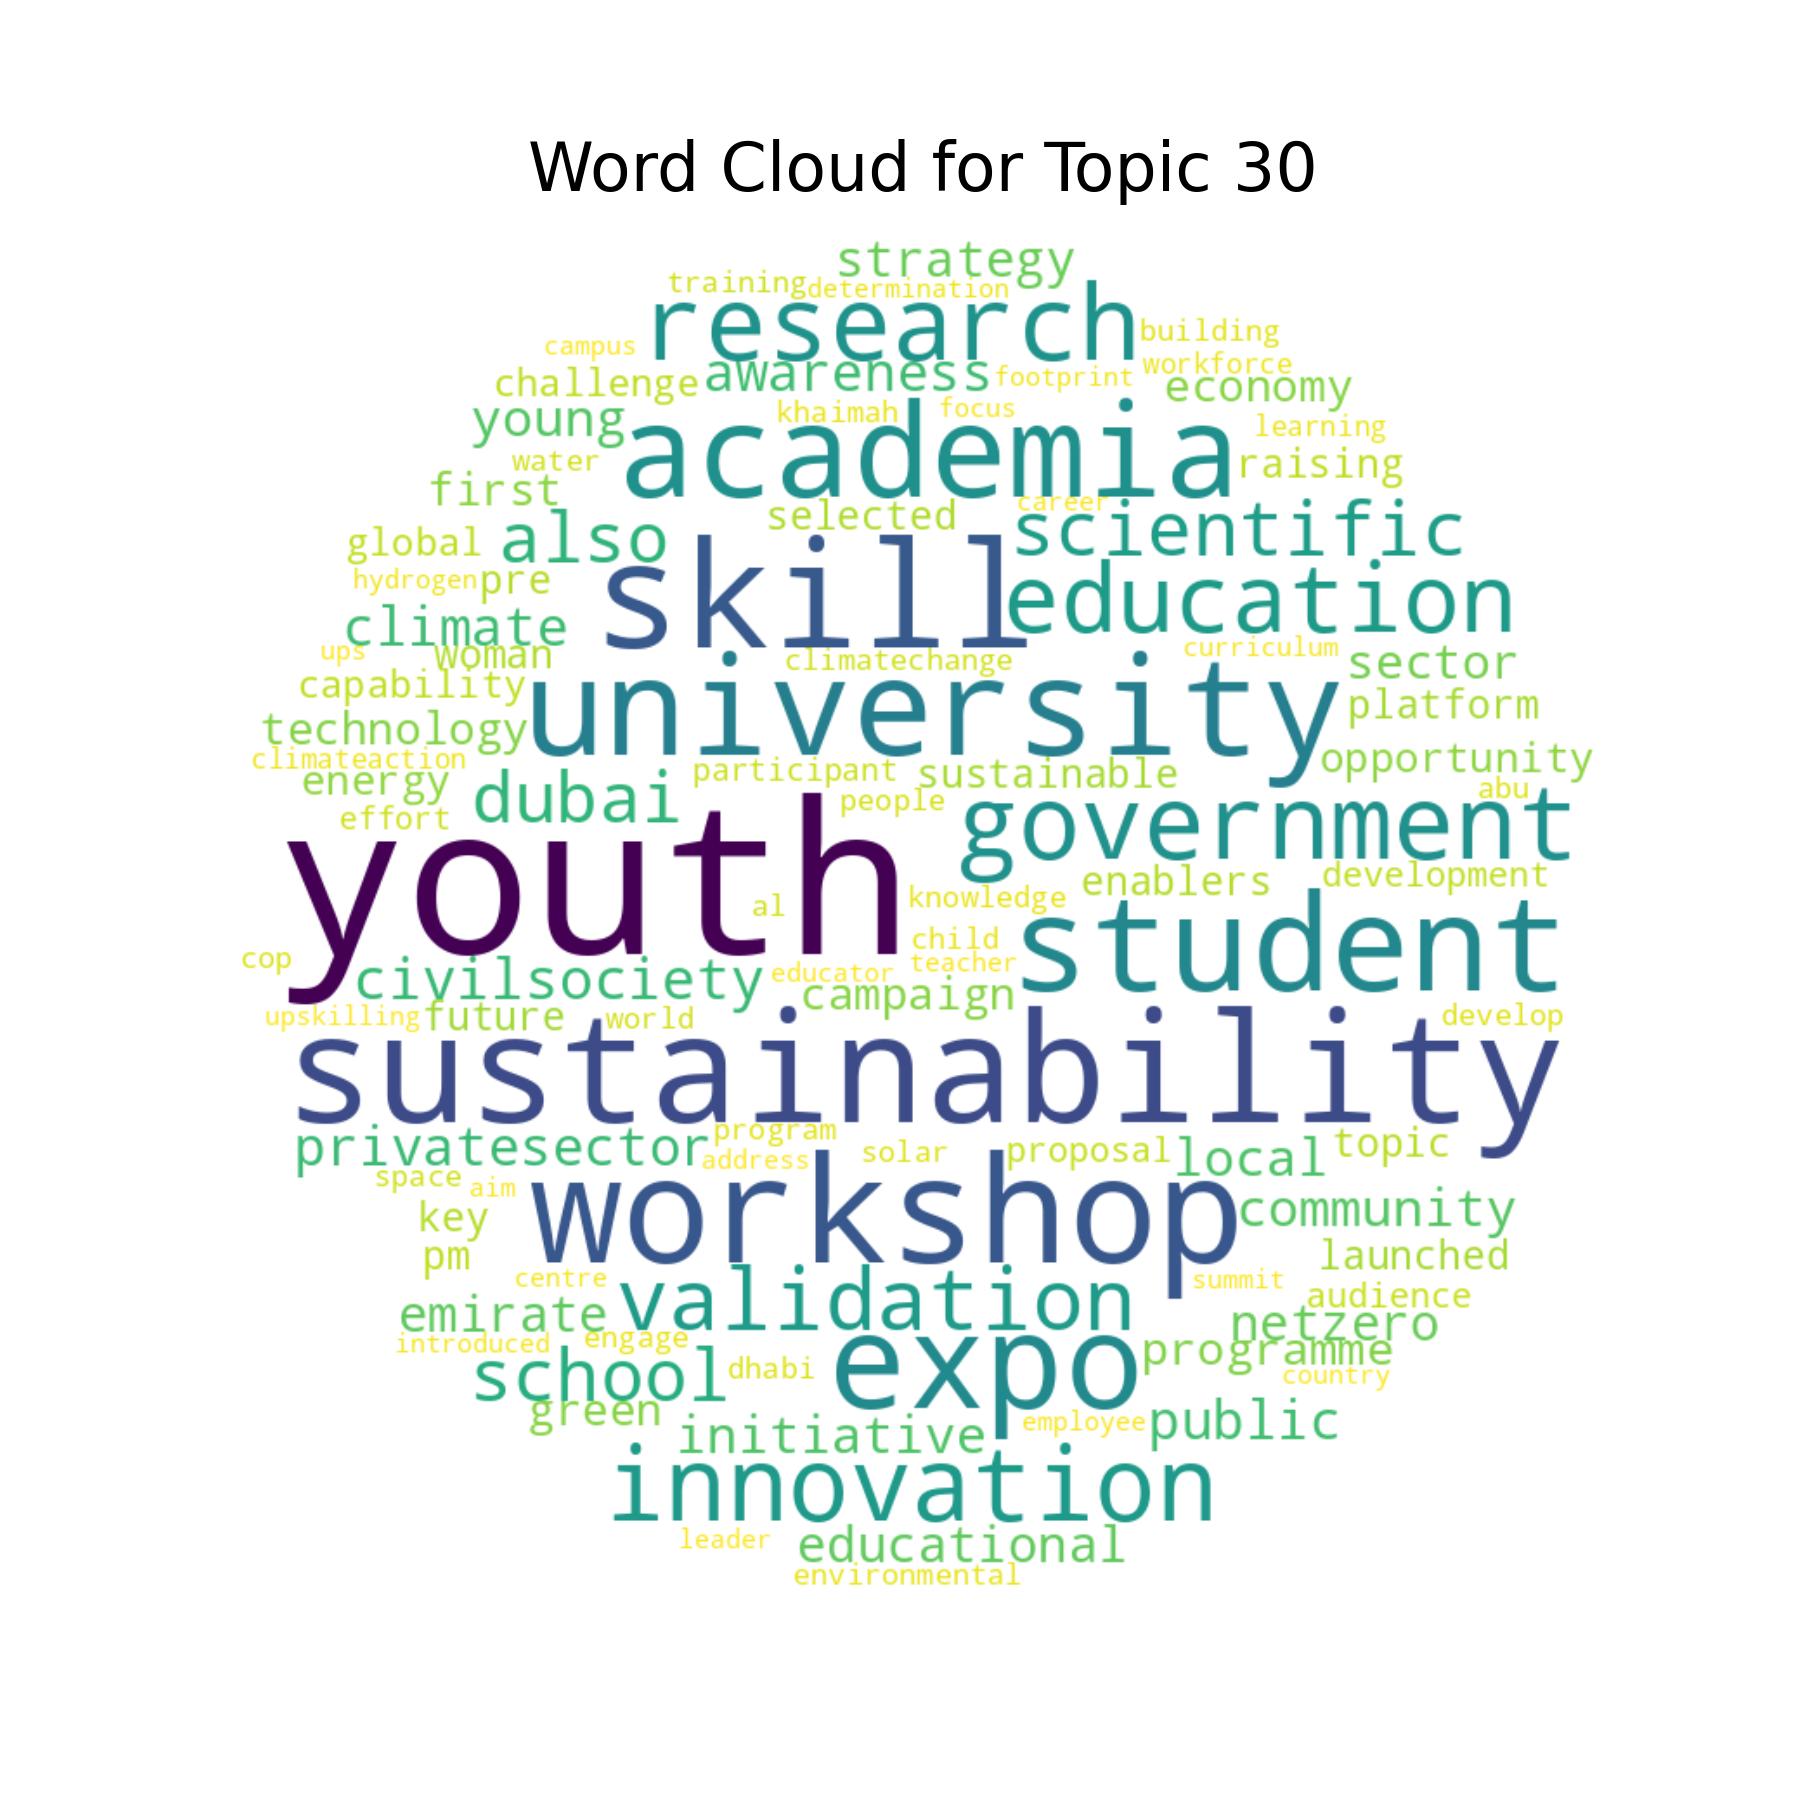 | T23: GHG emissions commitments  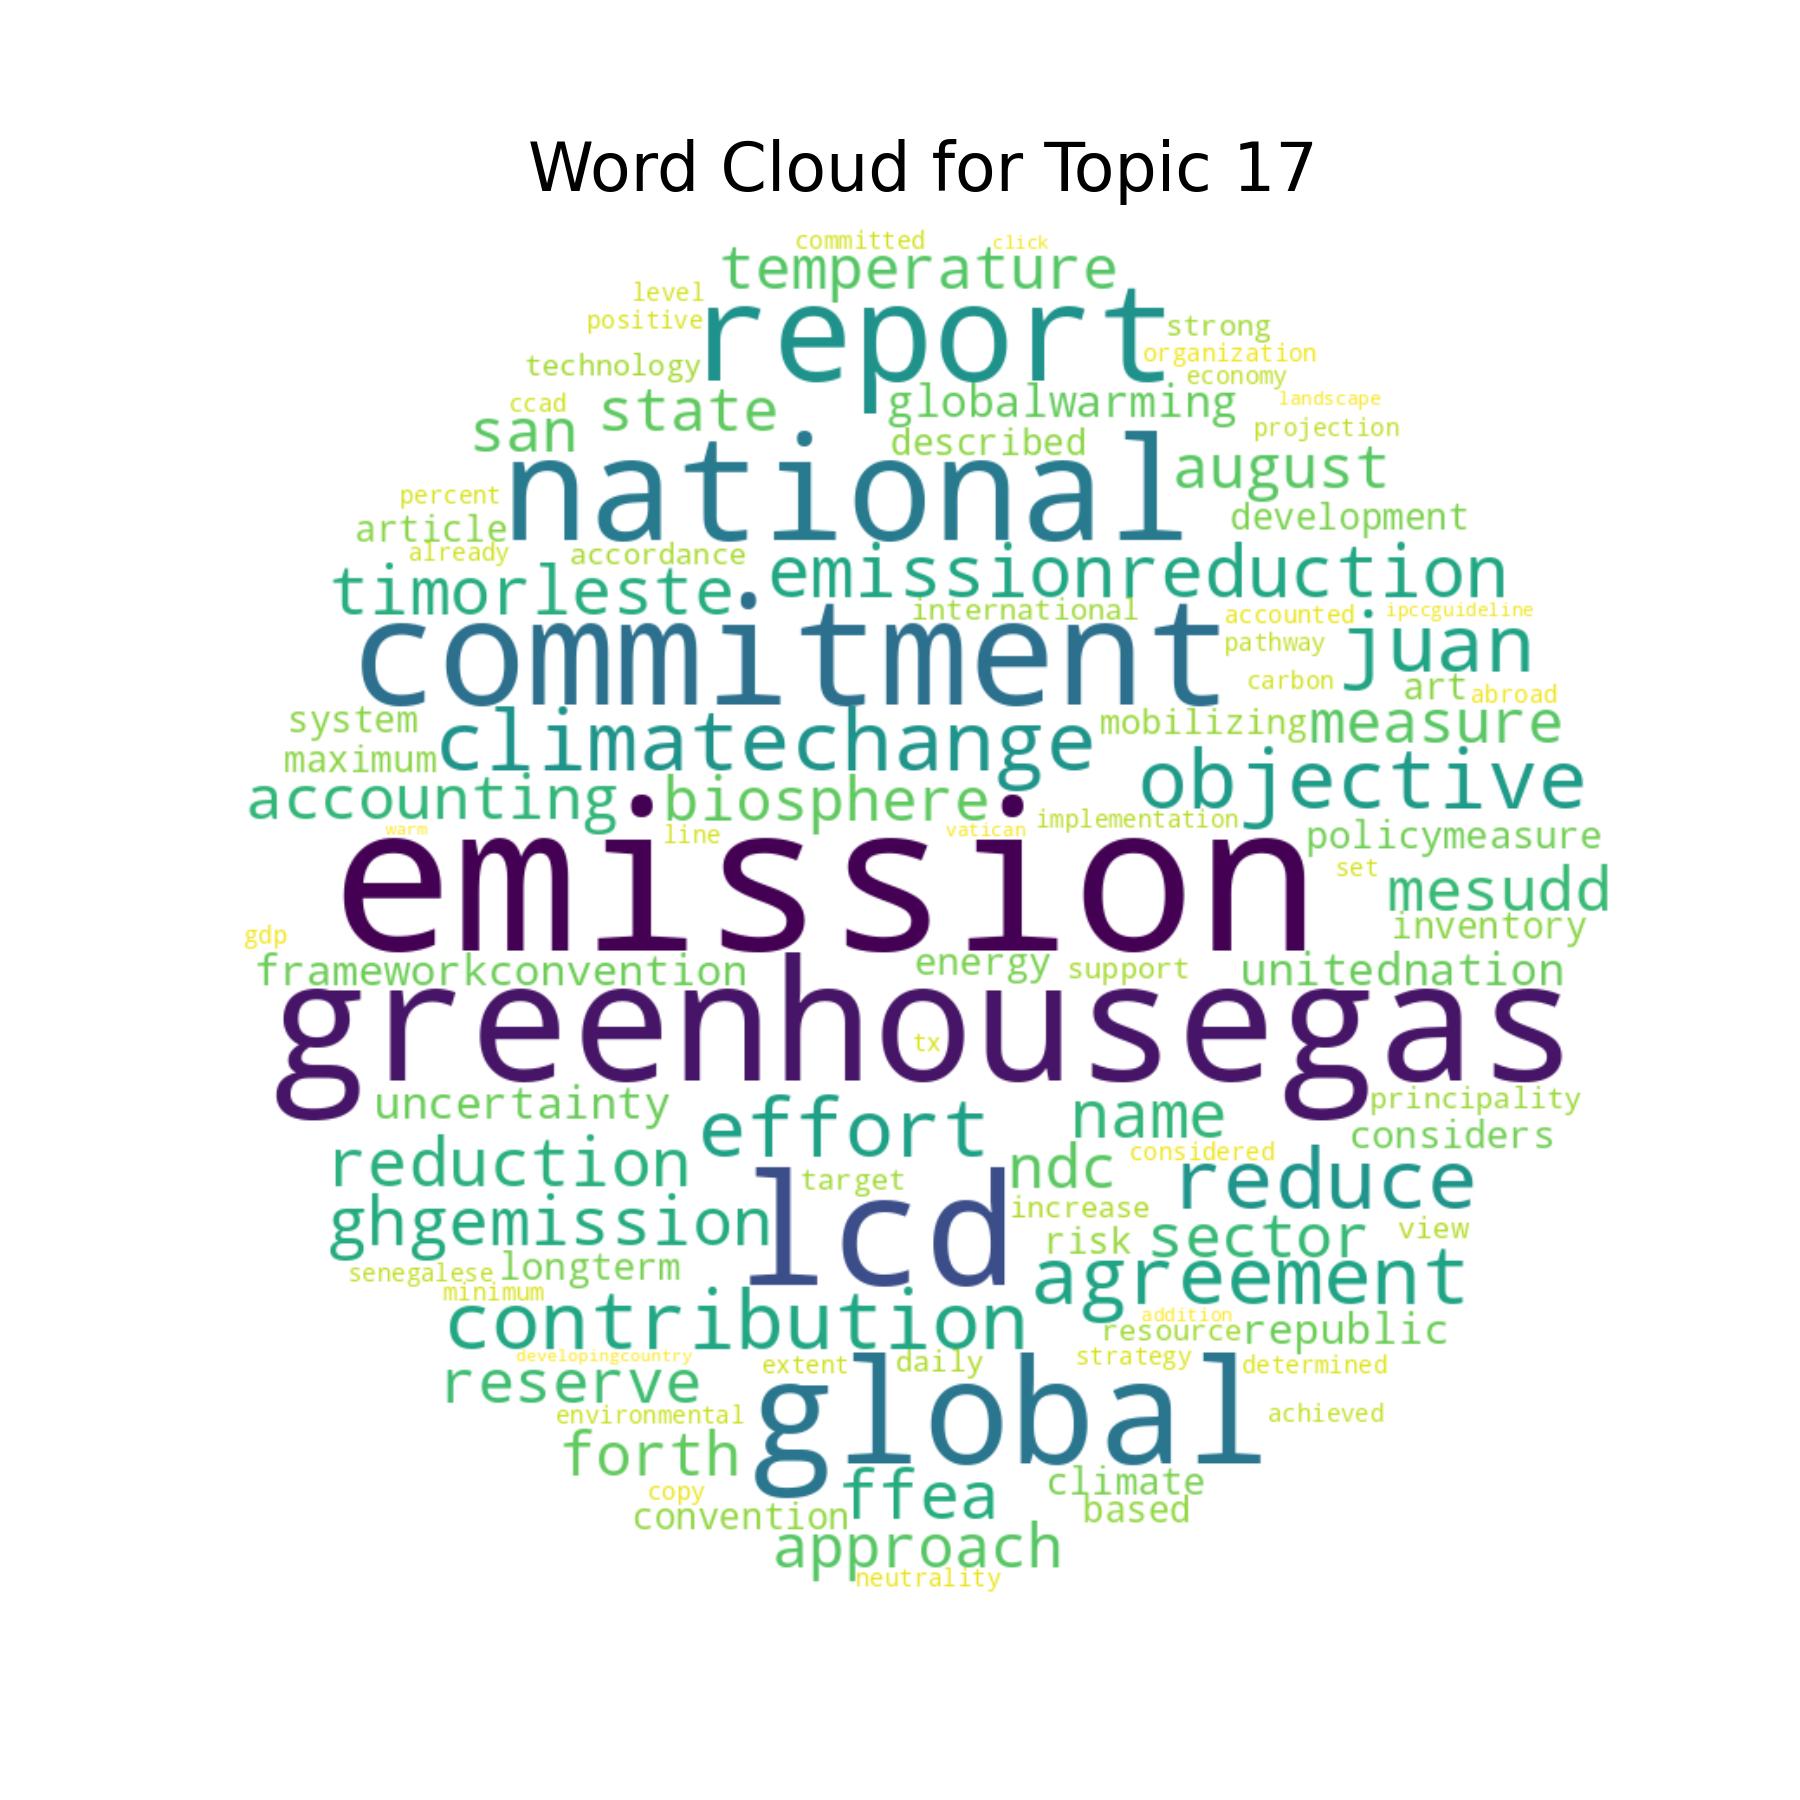 | T24: Public consultation  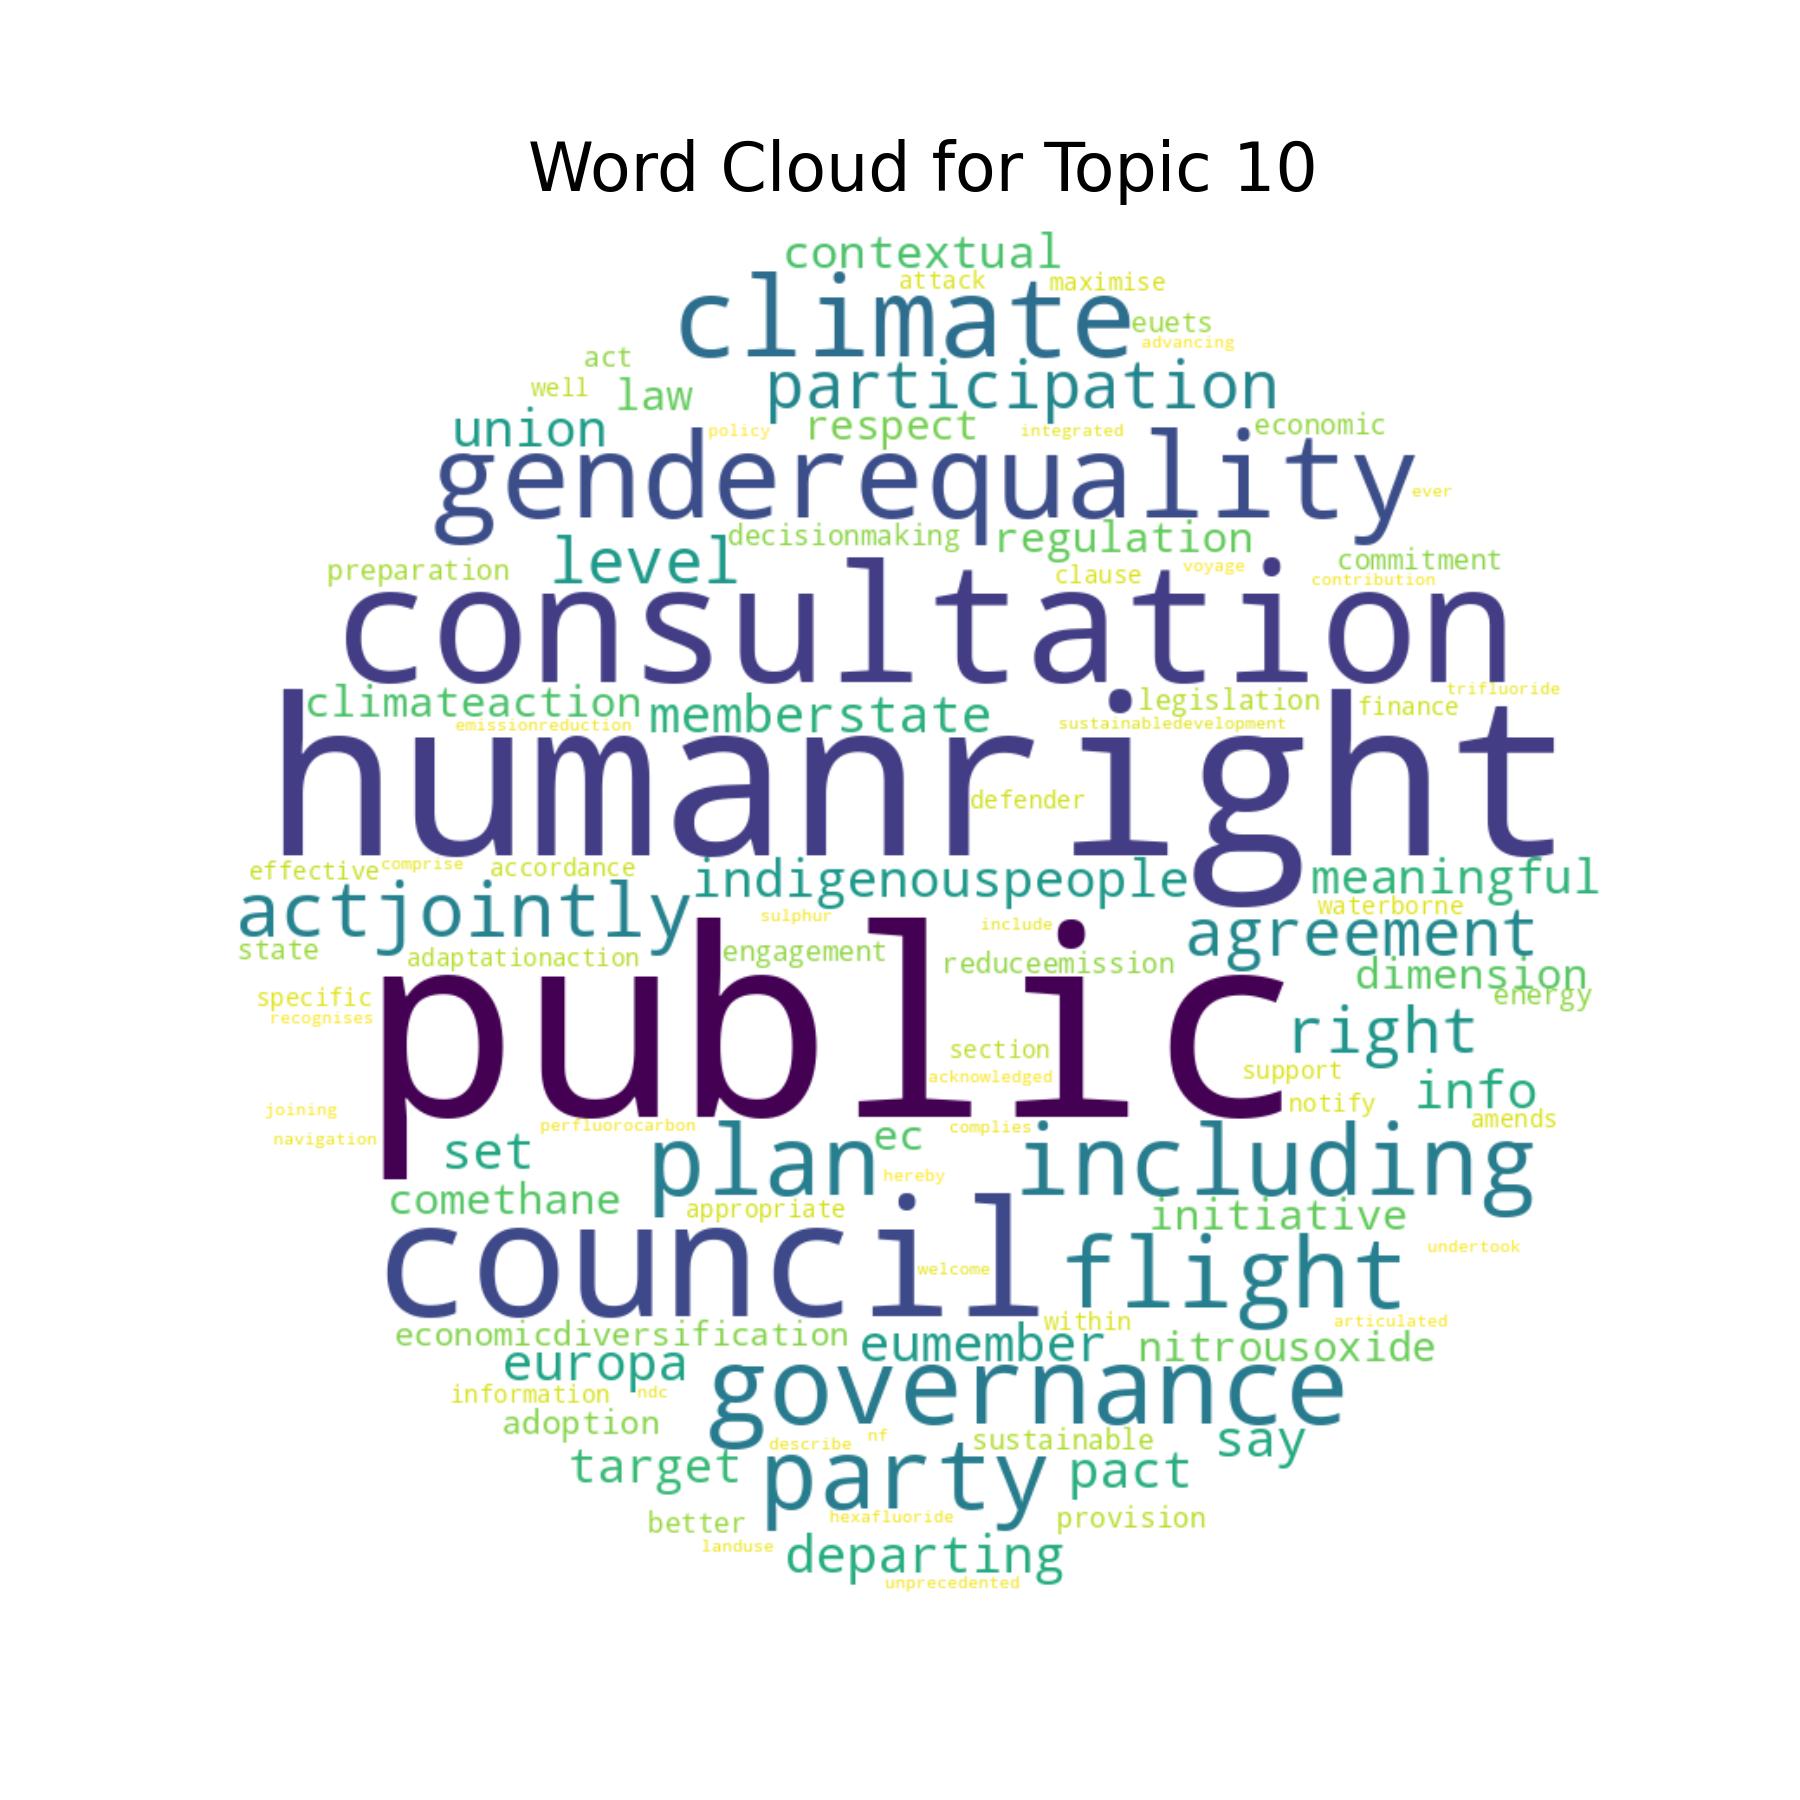 |
| T25: Carbon pricing and targets  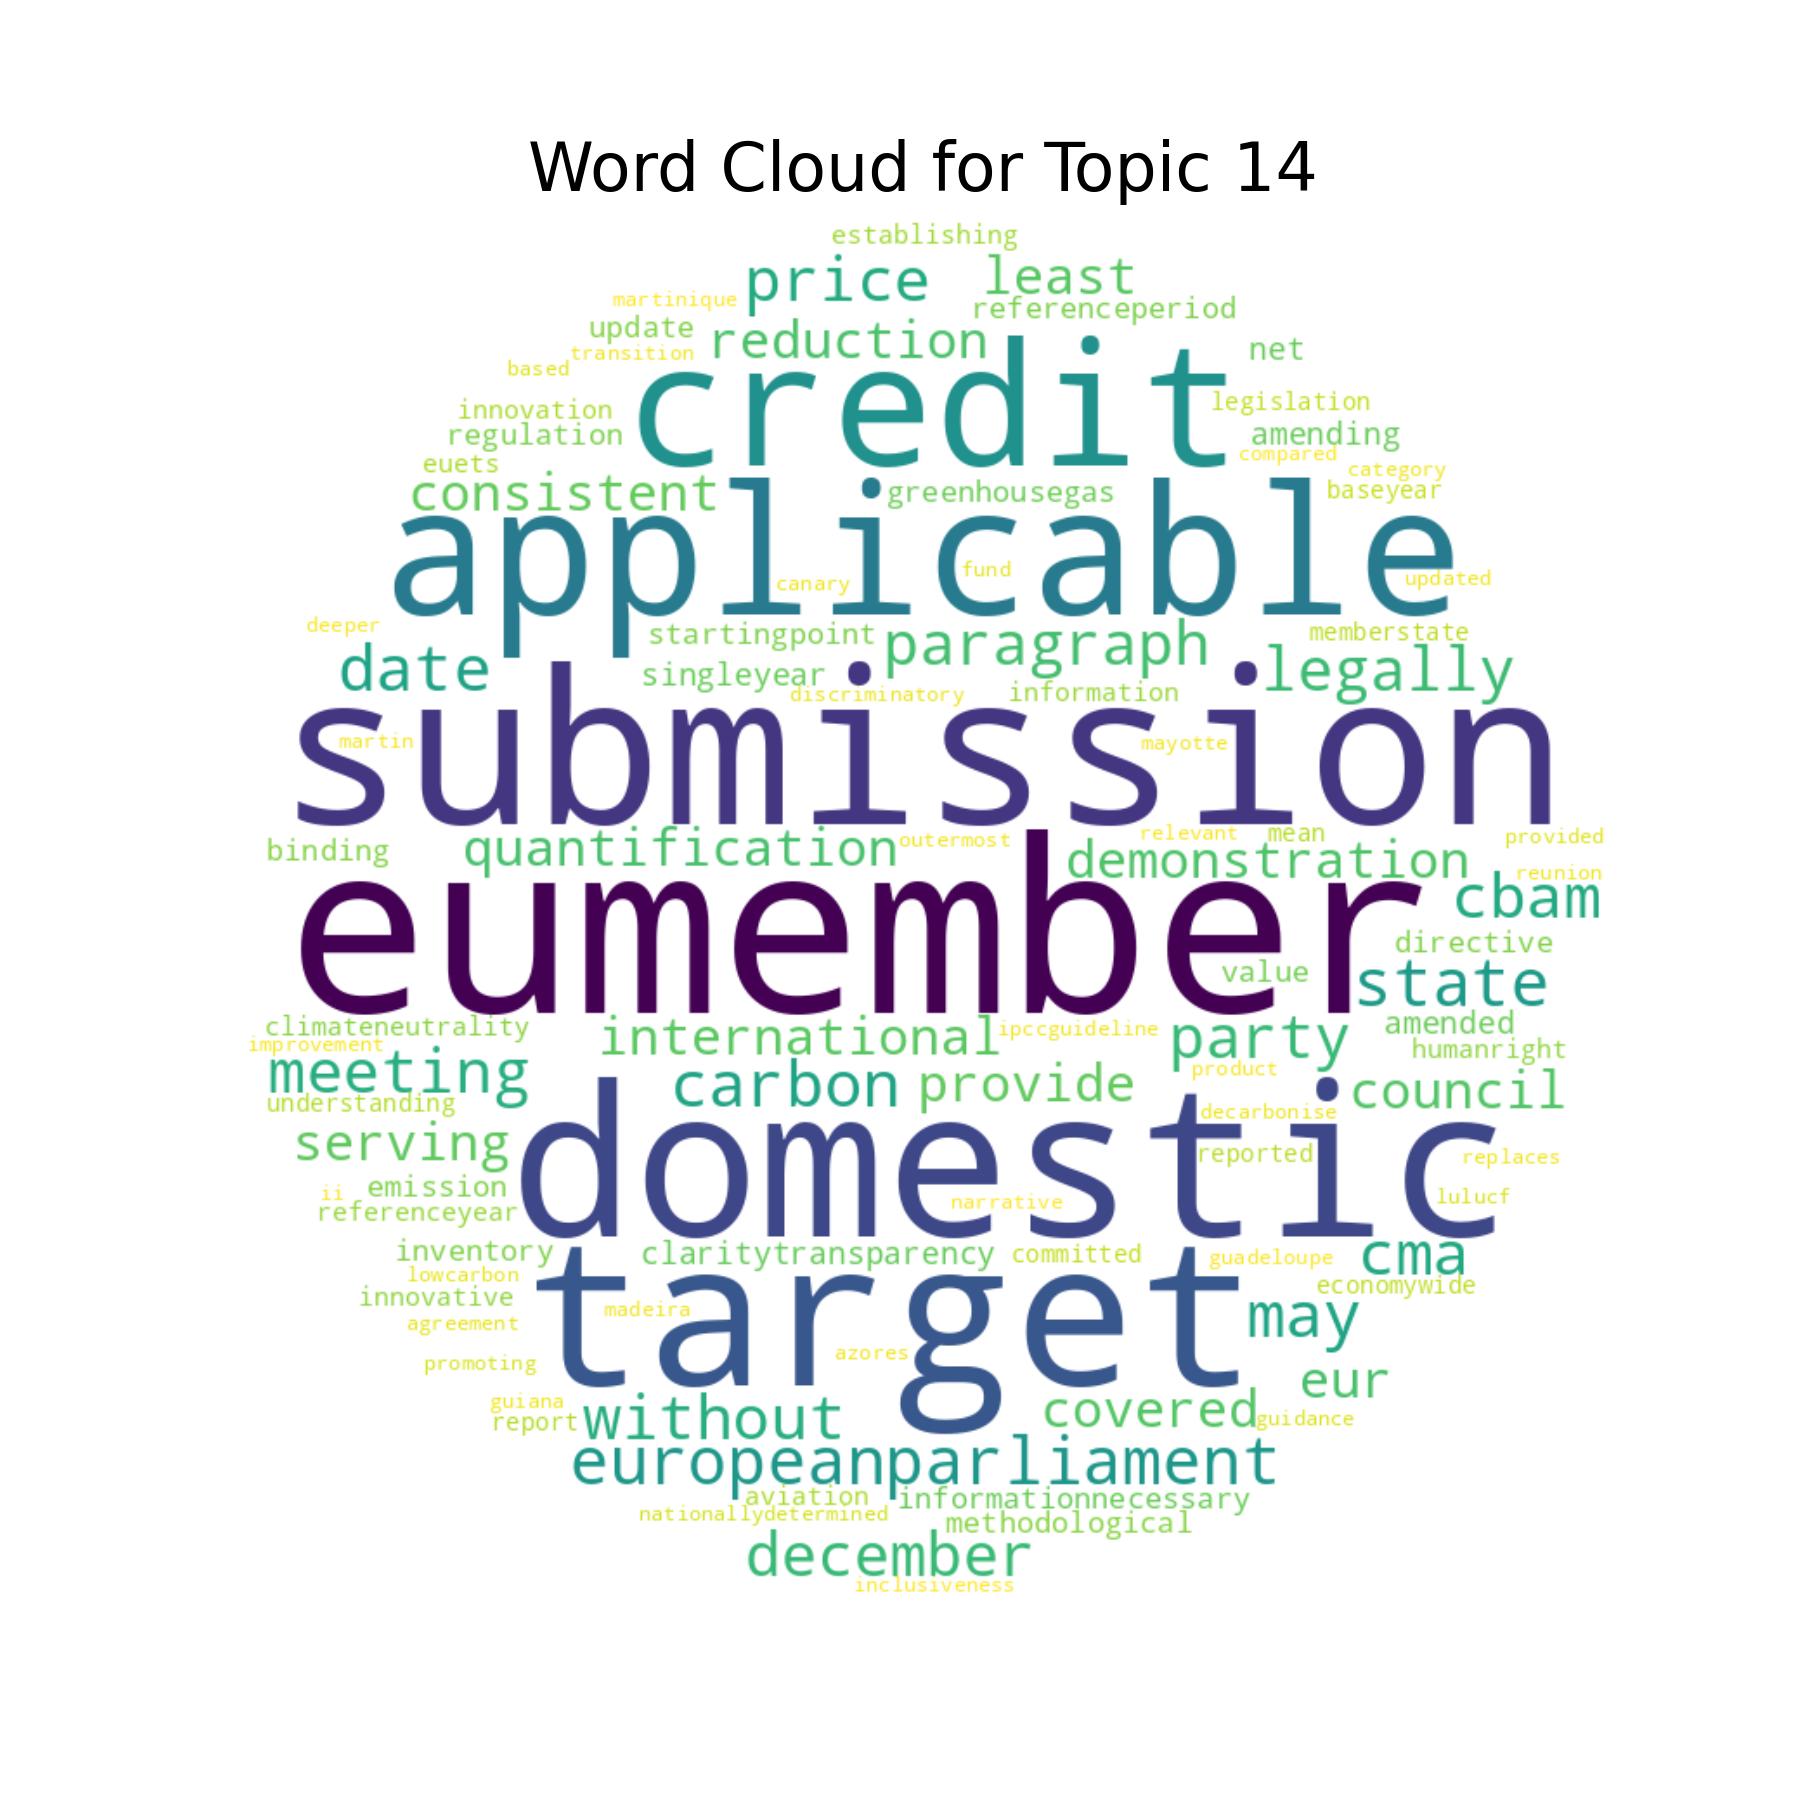 | T26: Ozone and refrigerants  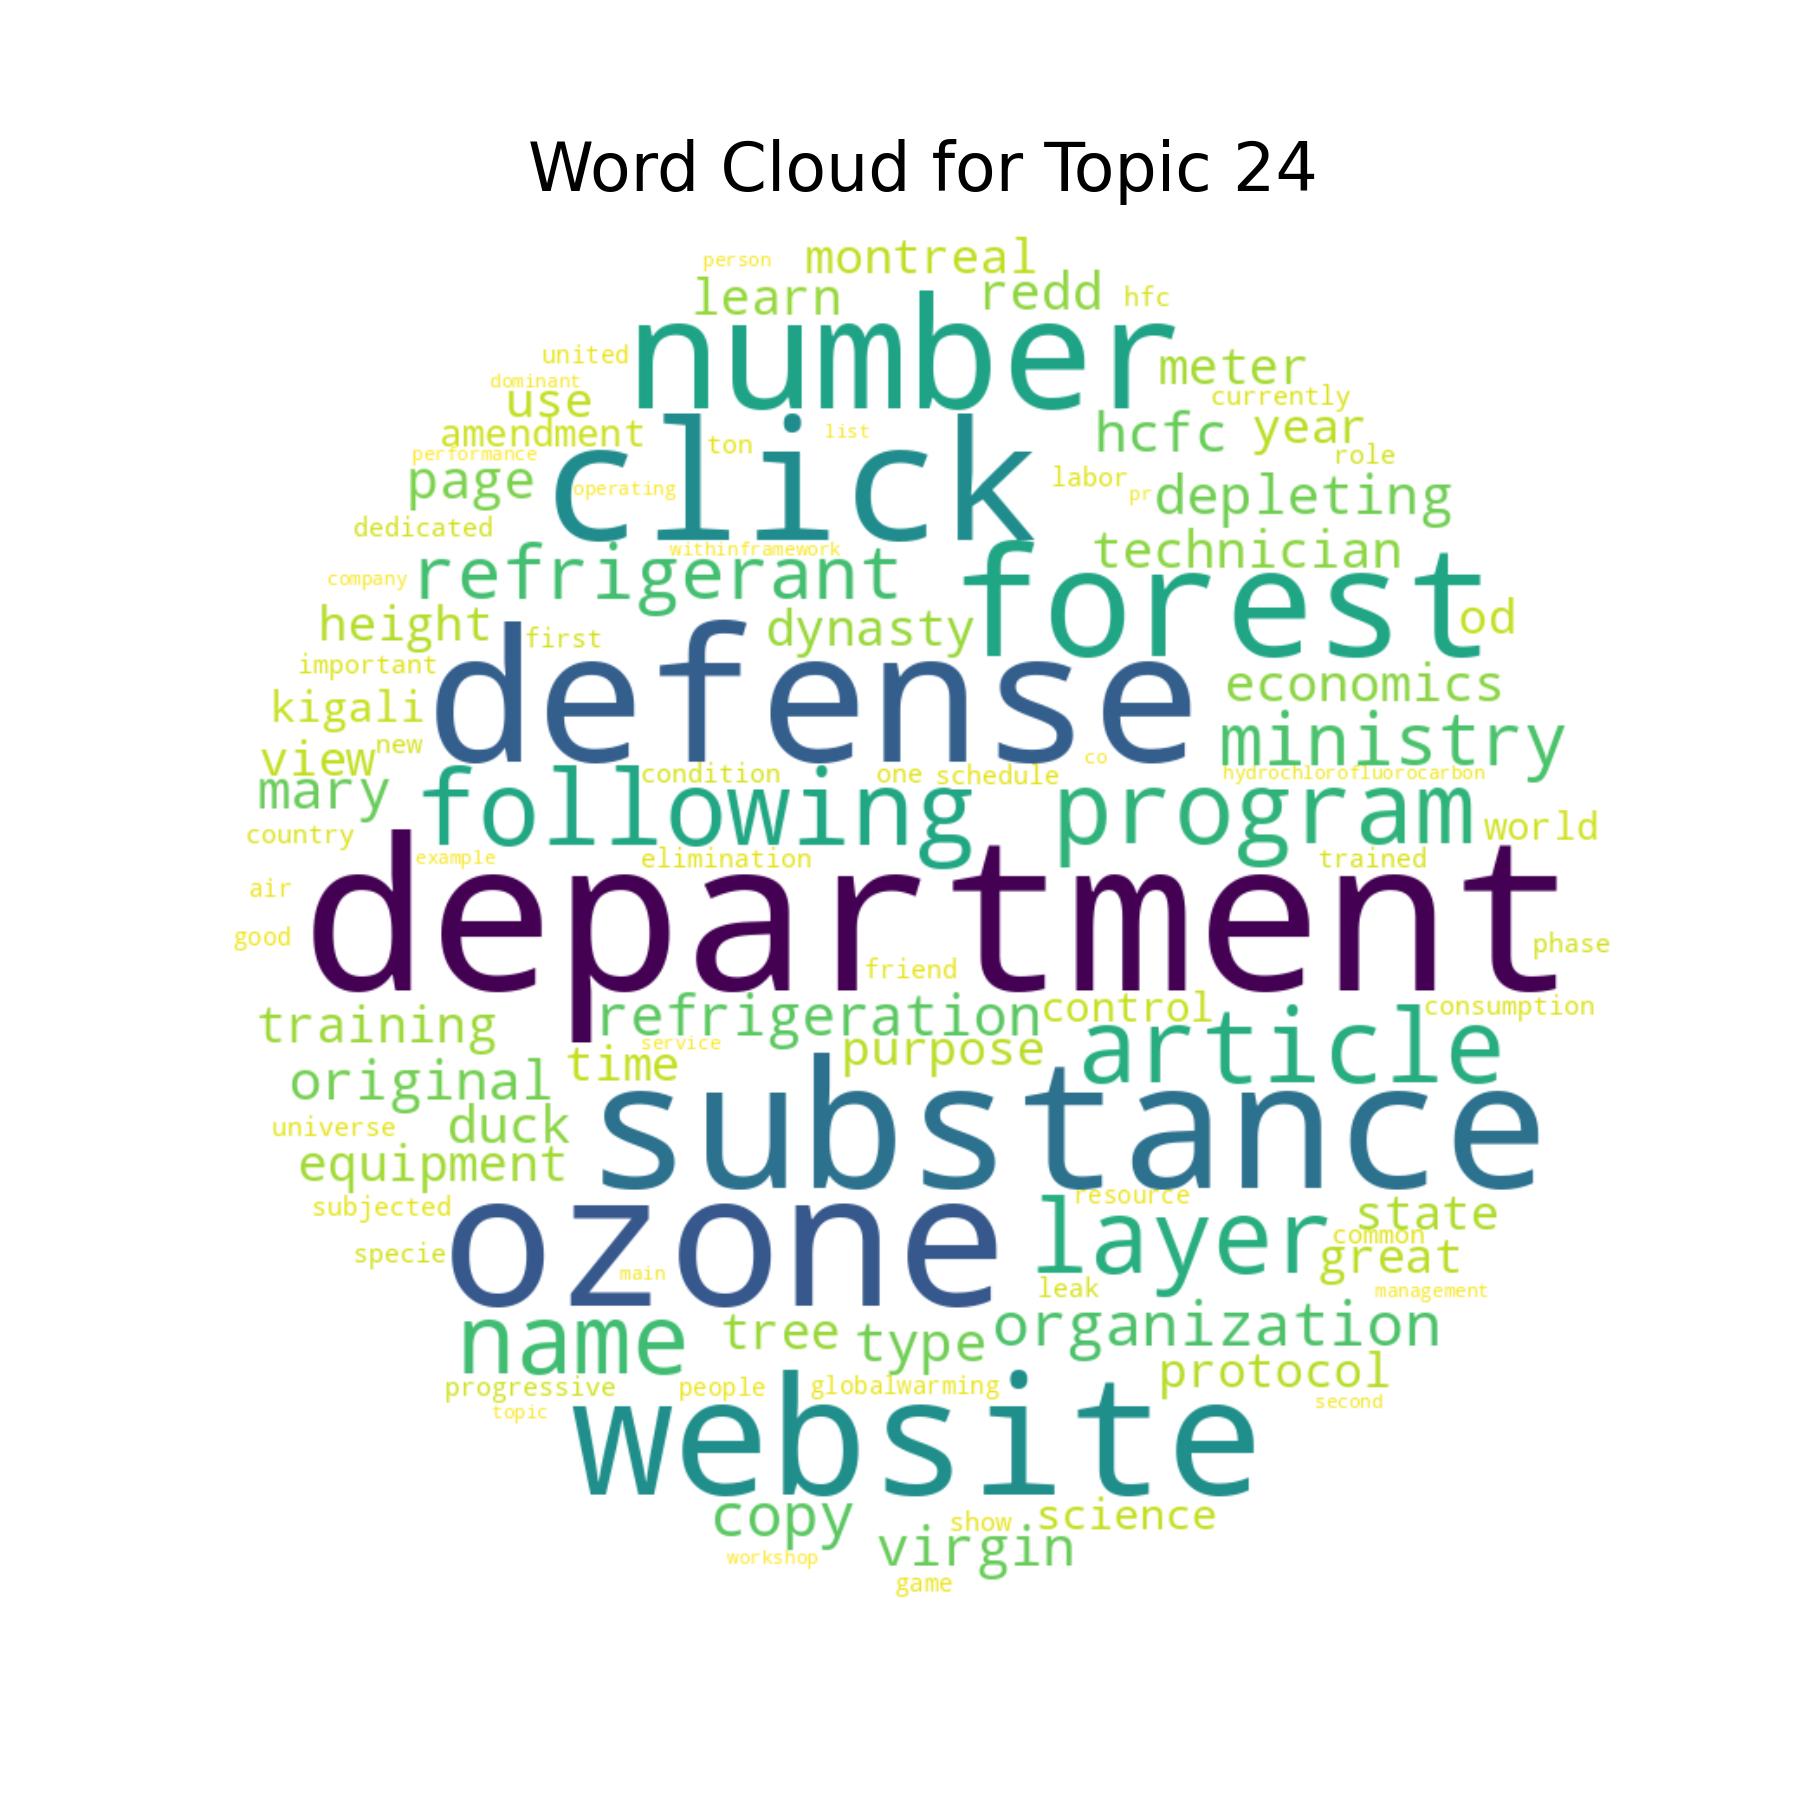 | T27: Emission trading  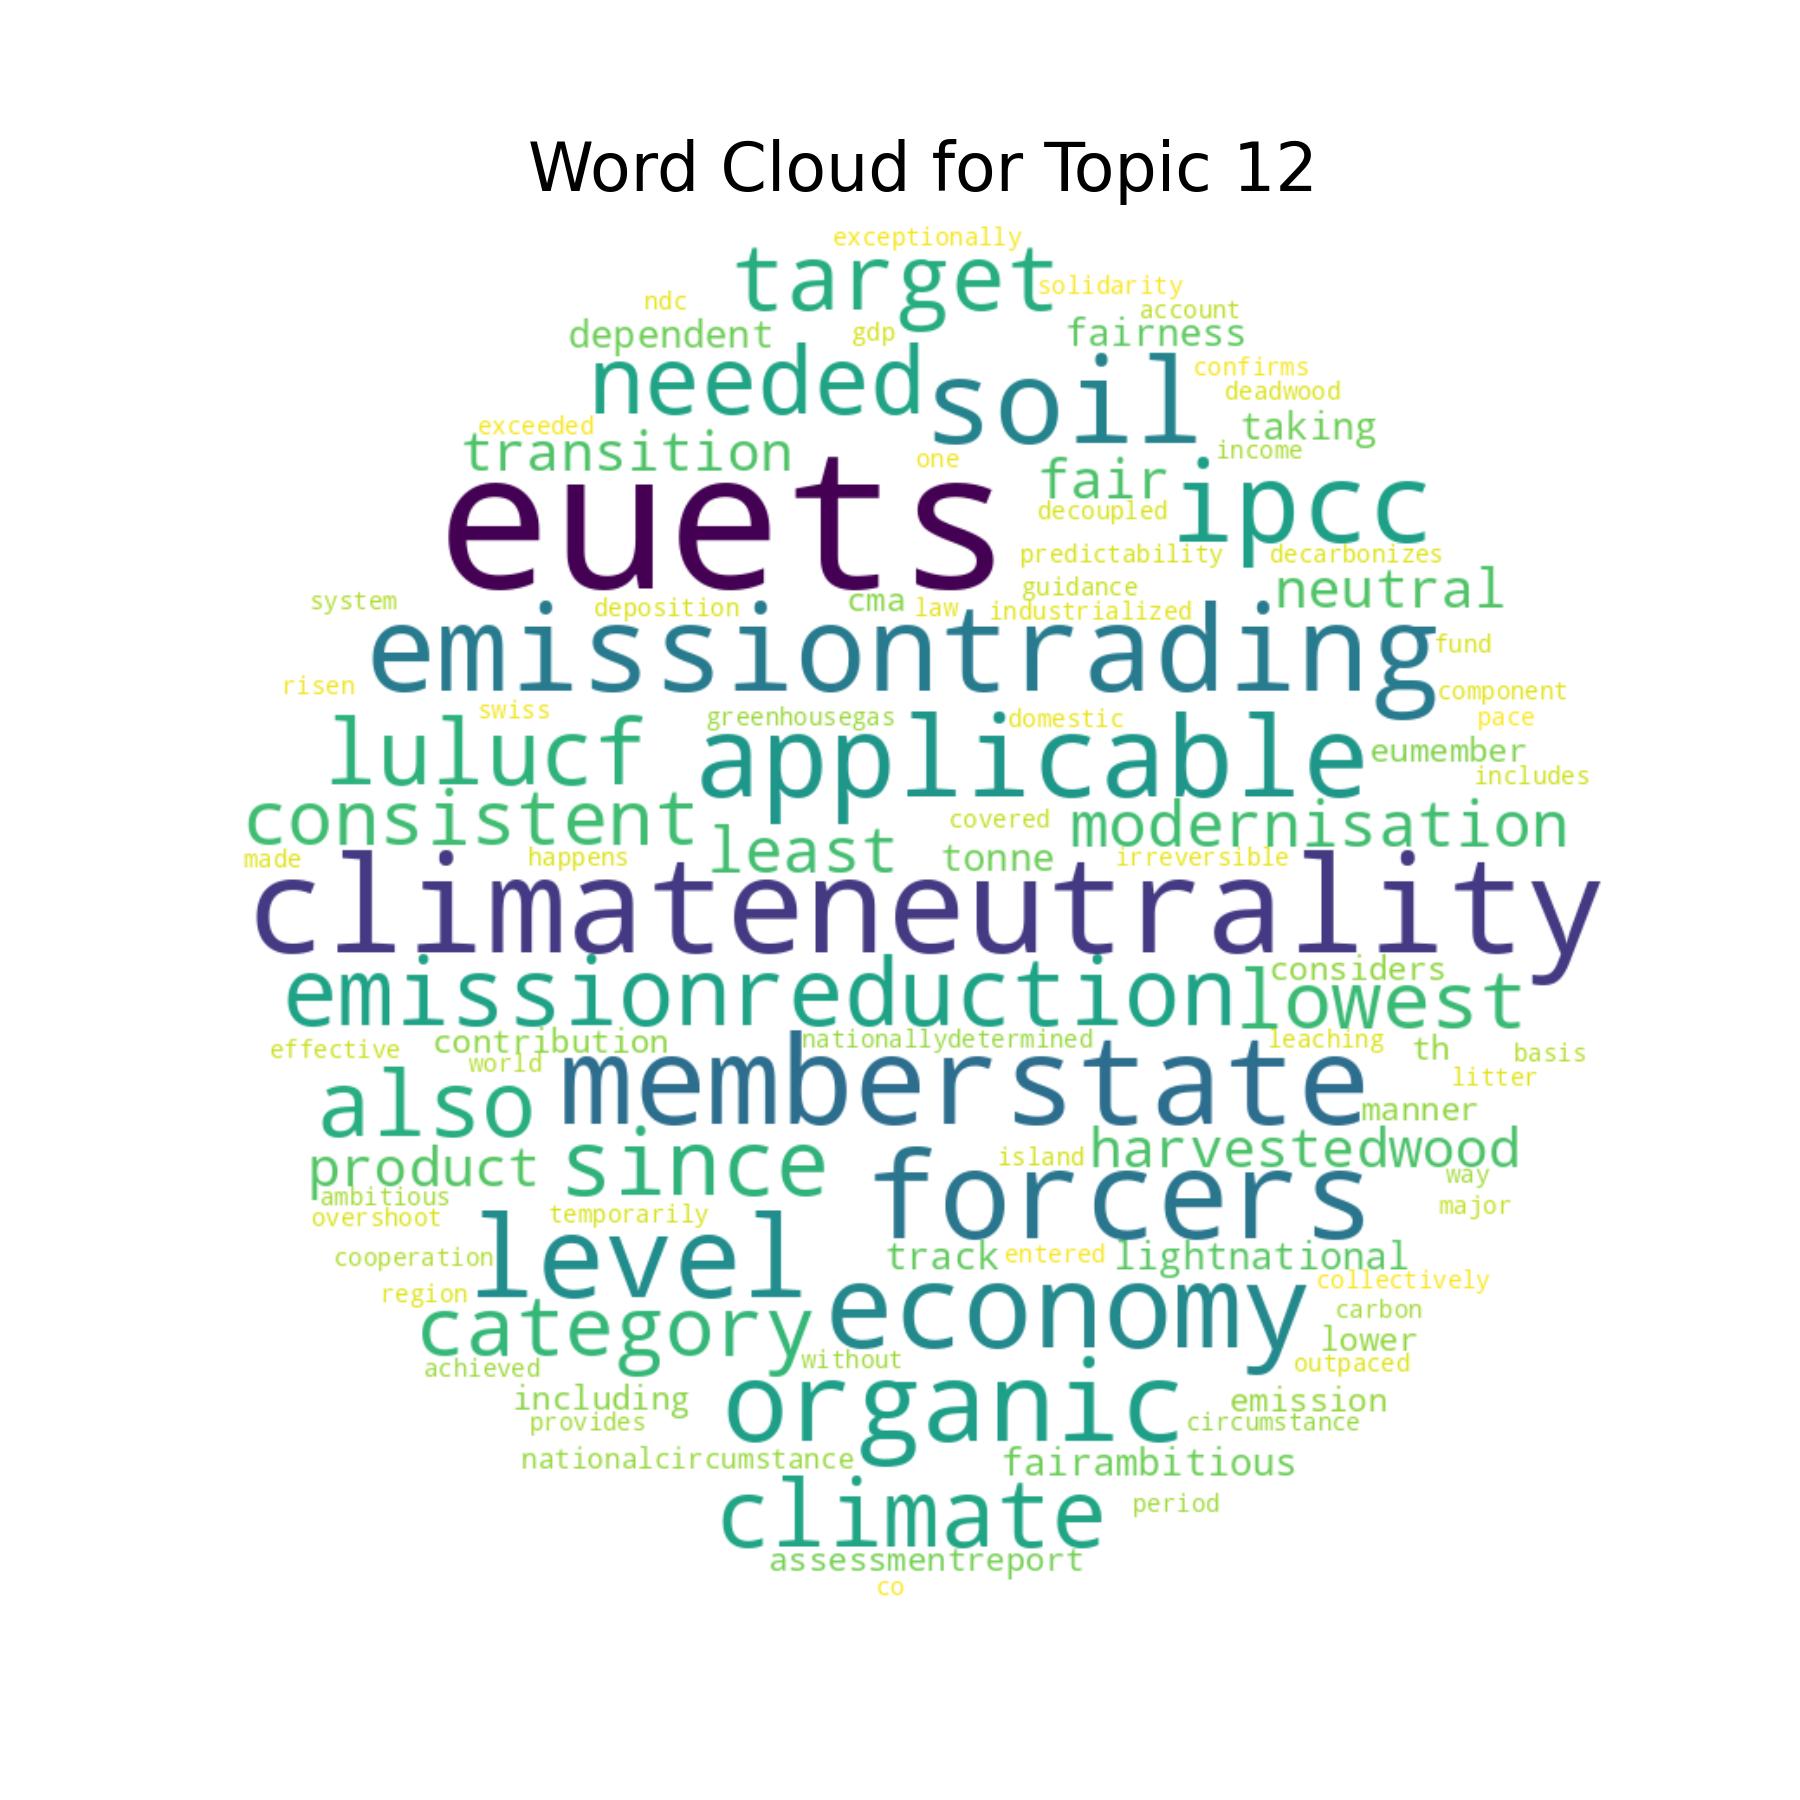 | T28: Legislation and directives  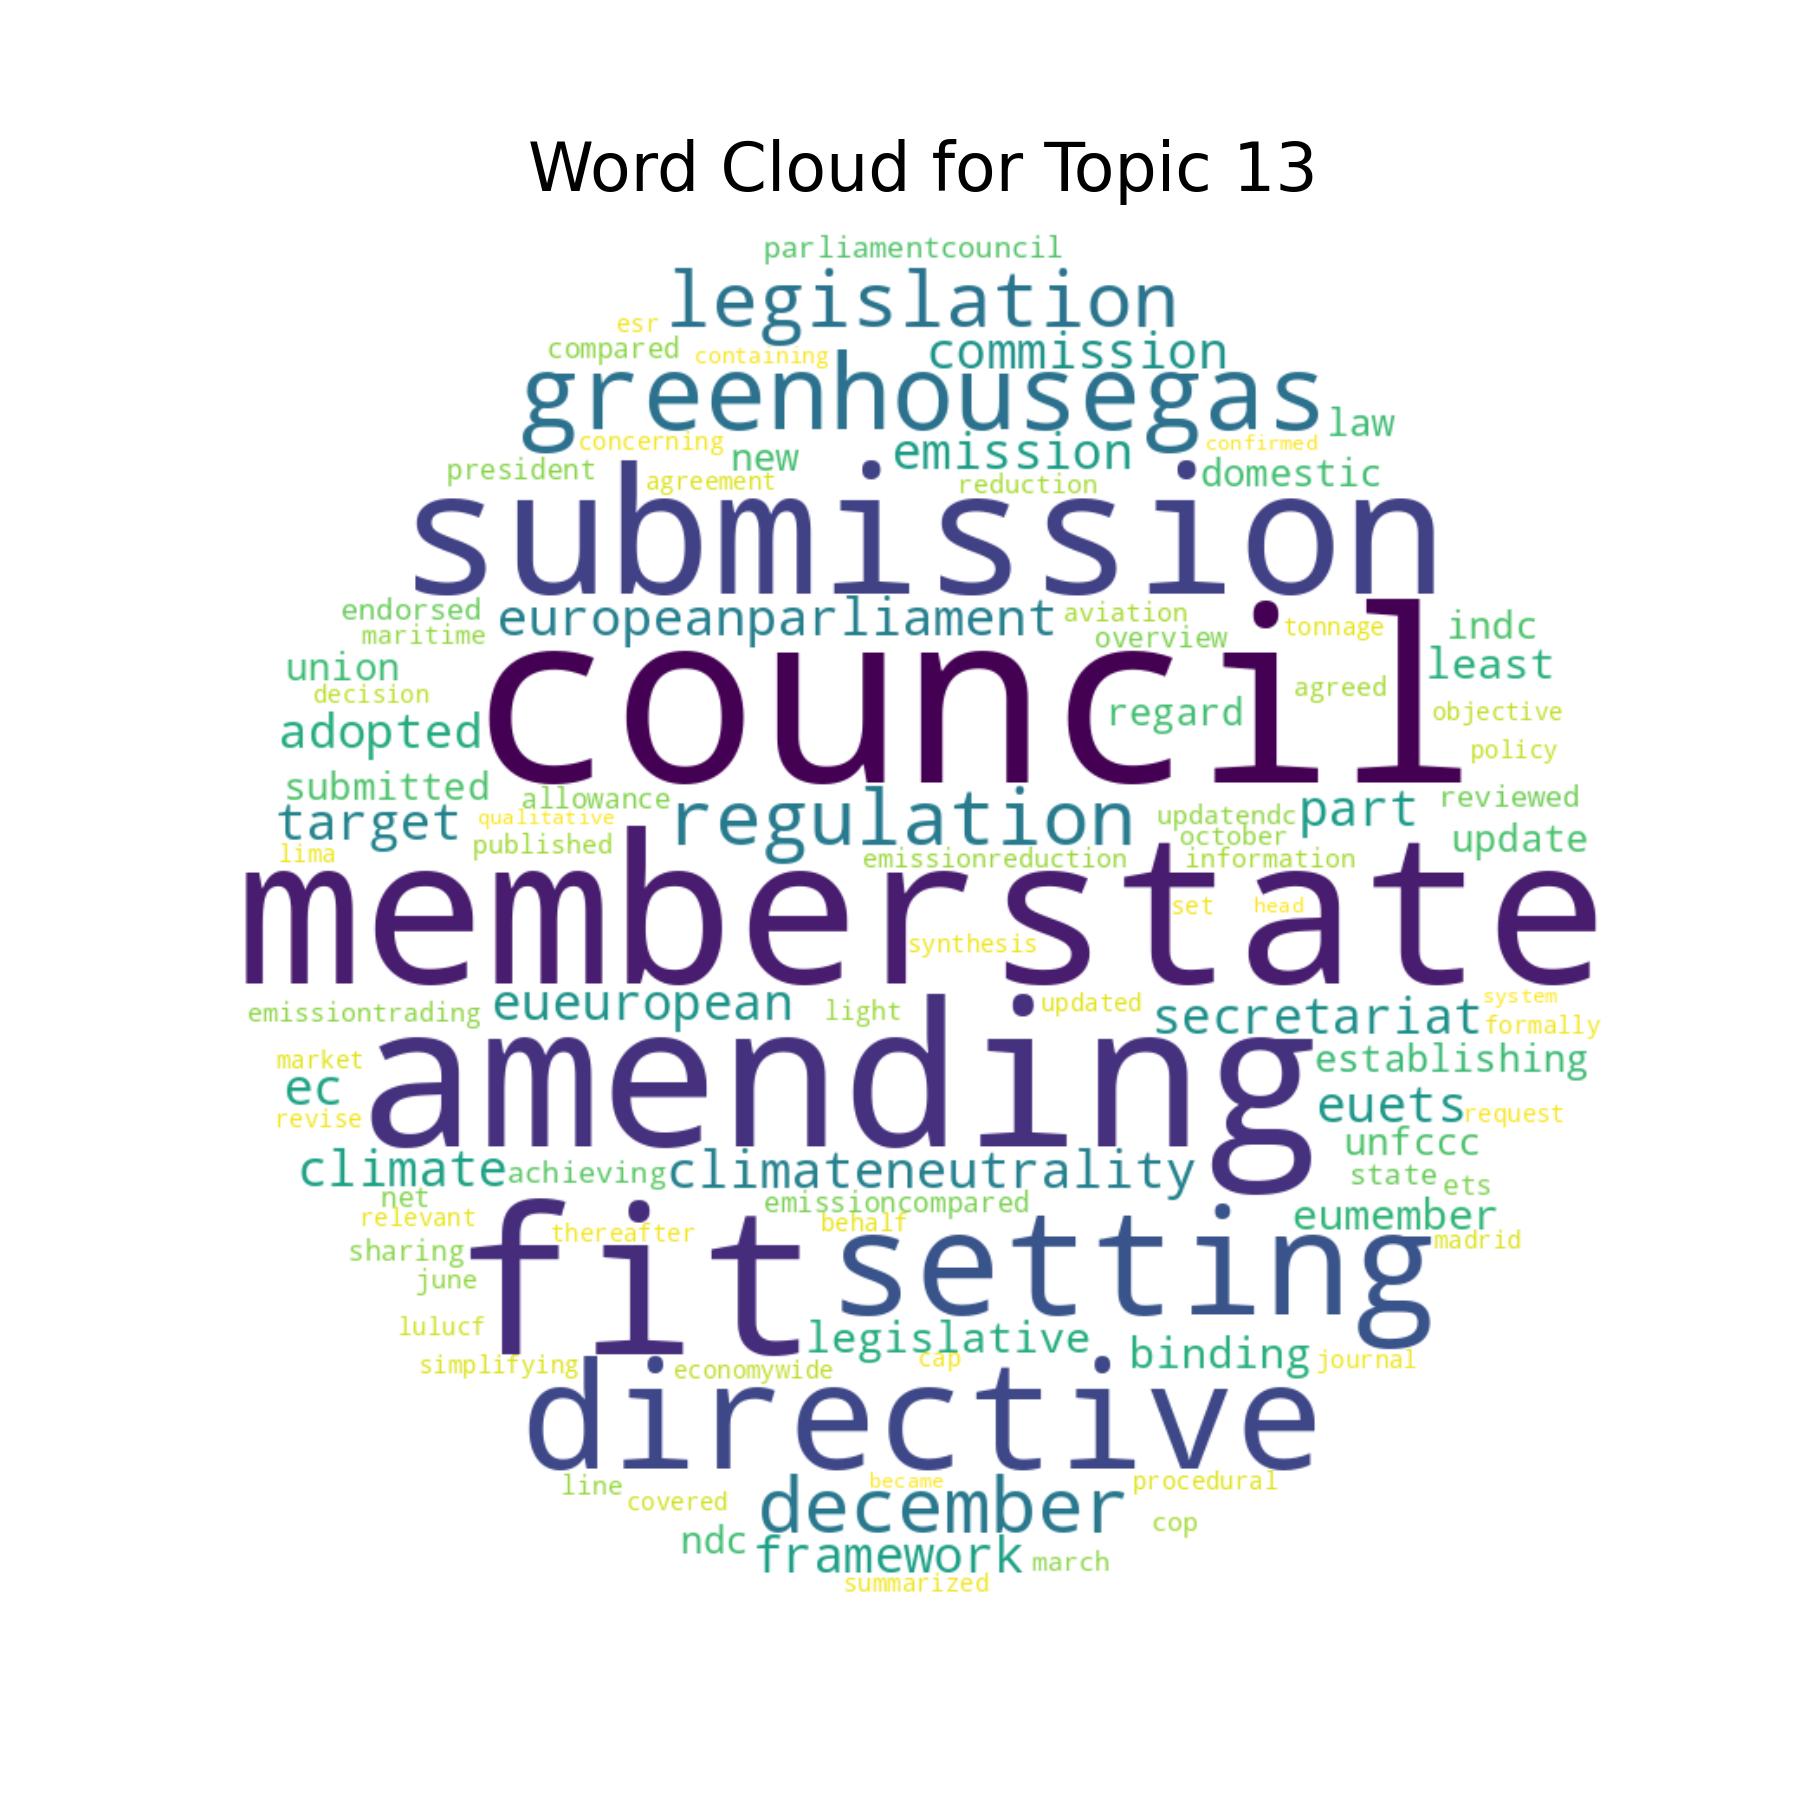 | T29: Net zero strategies  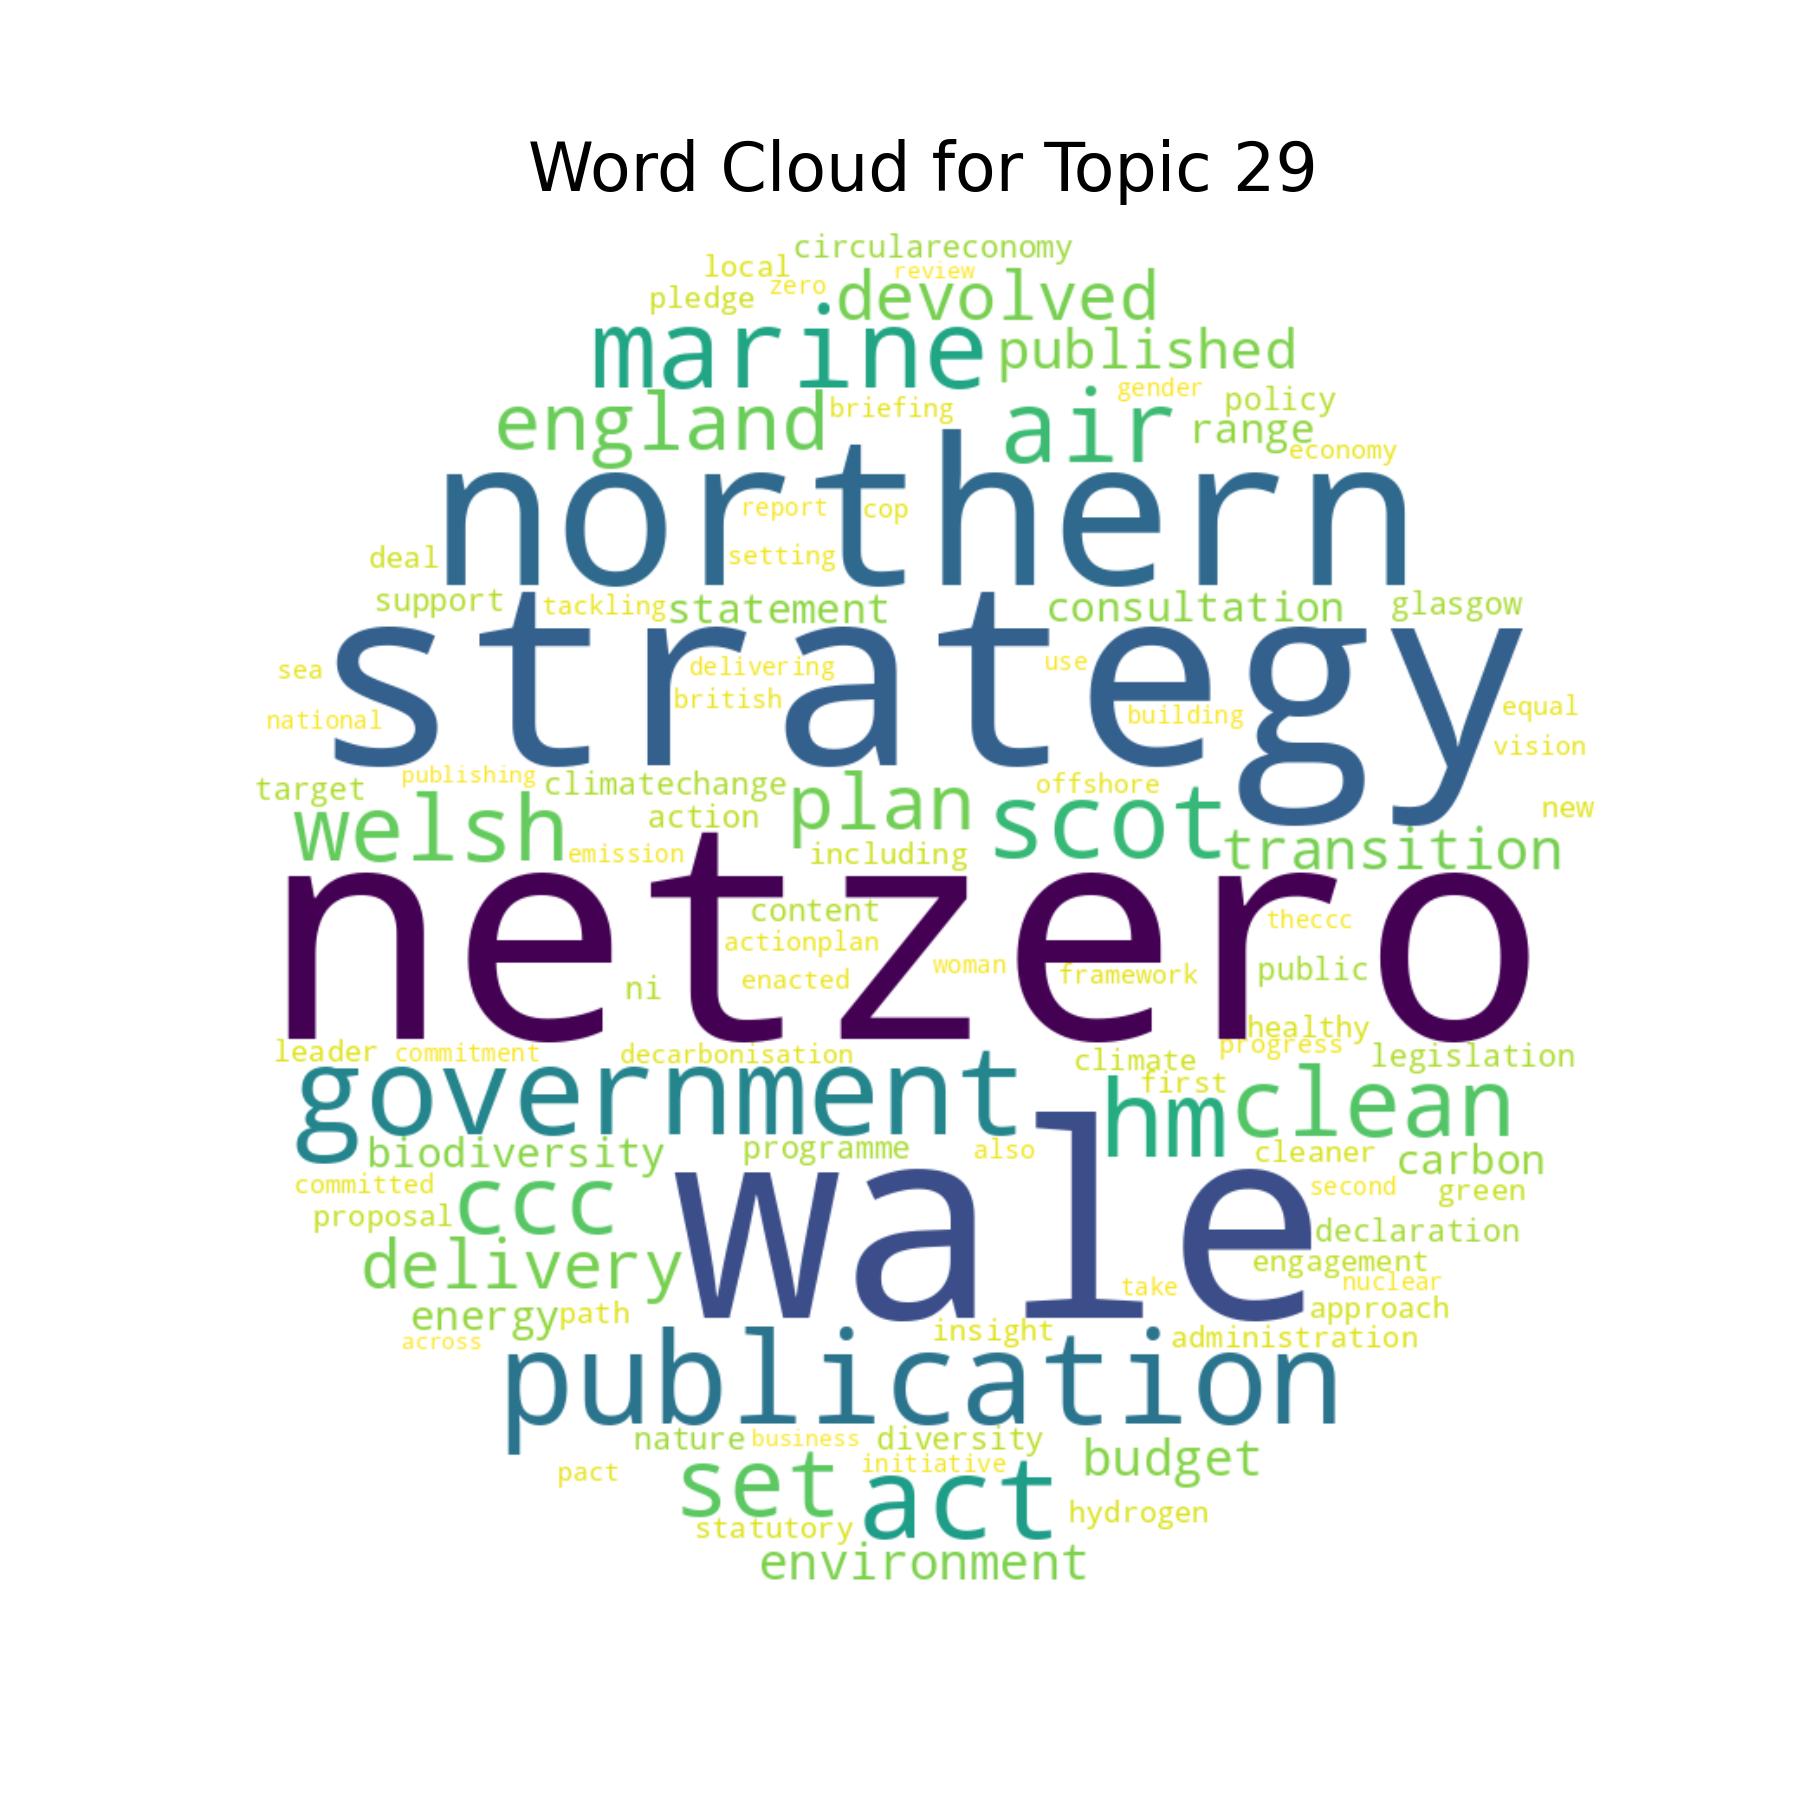 | T30: Agreement compliance  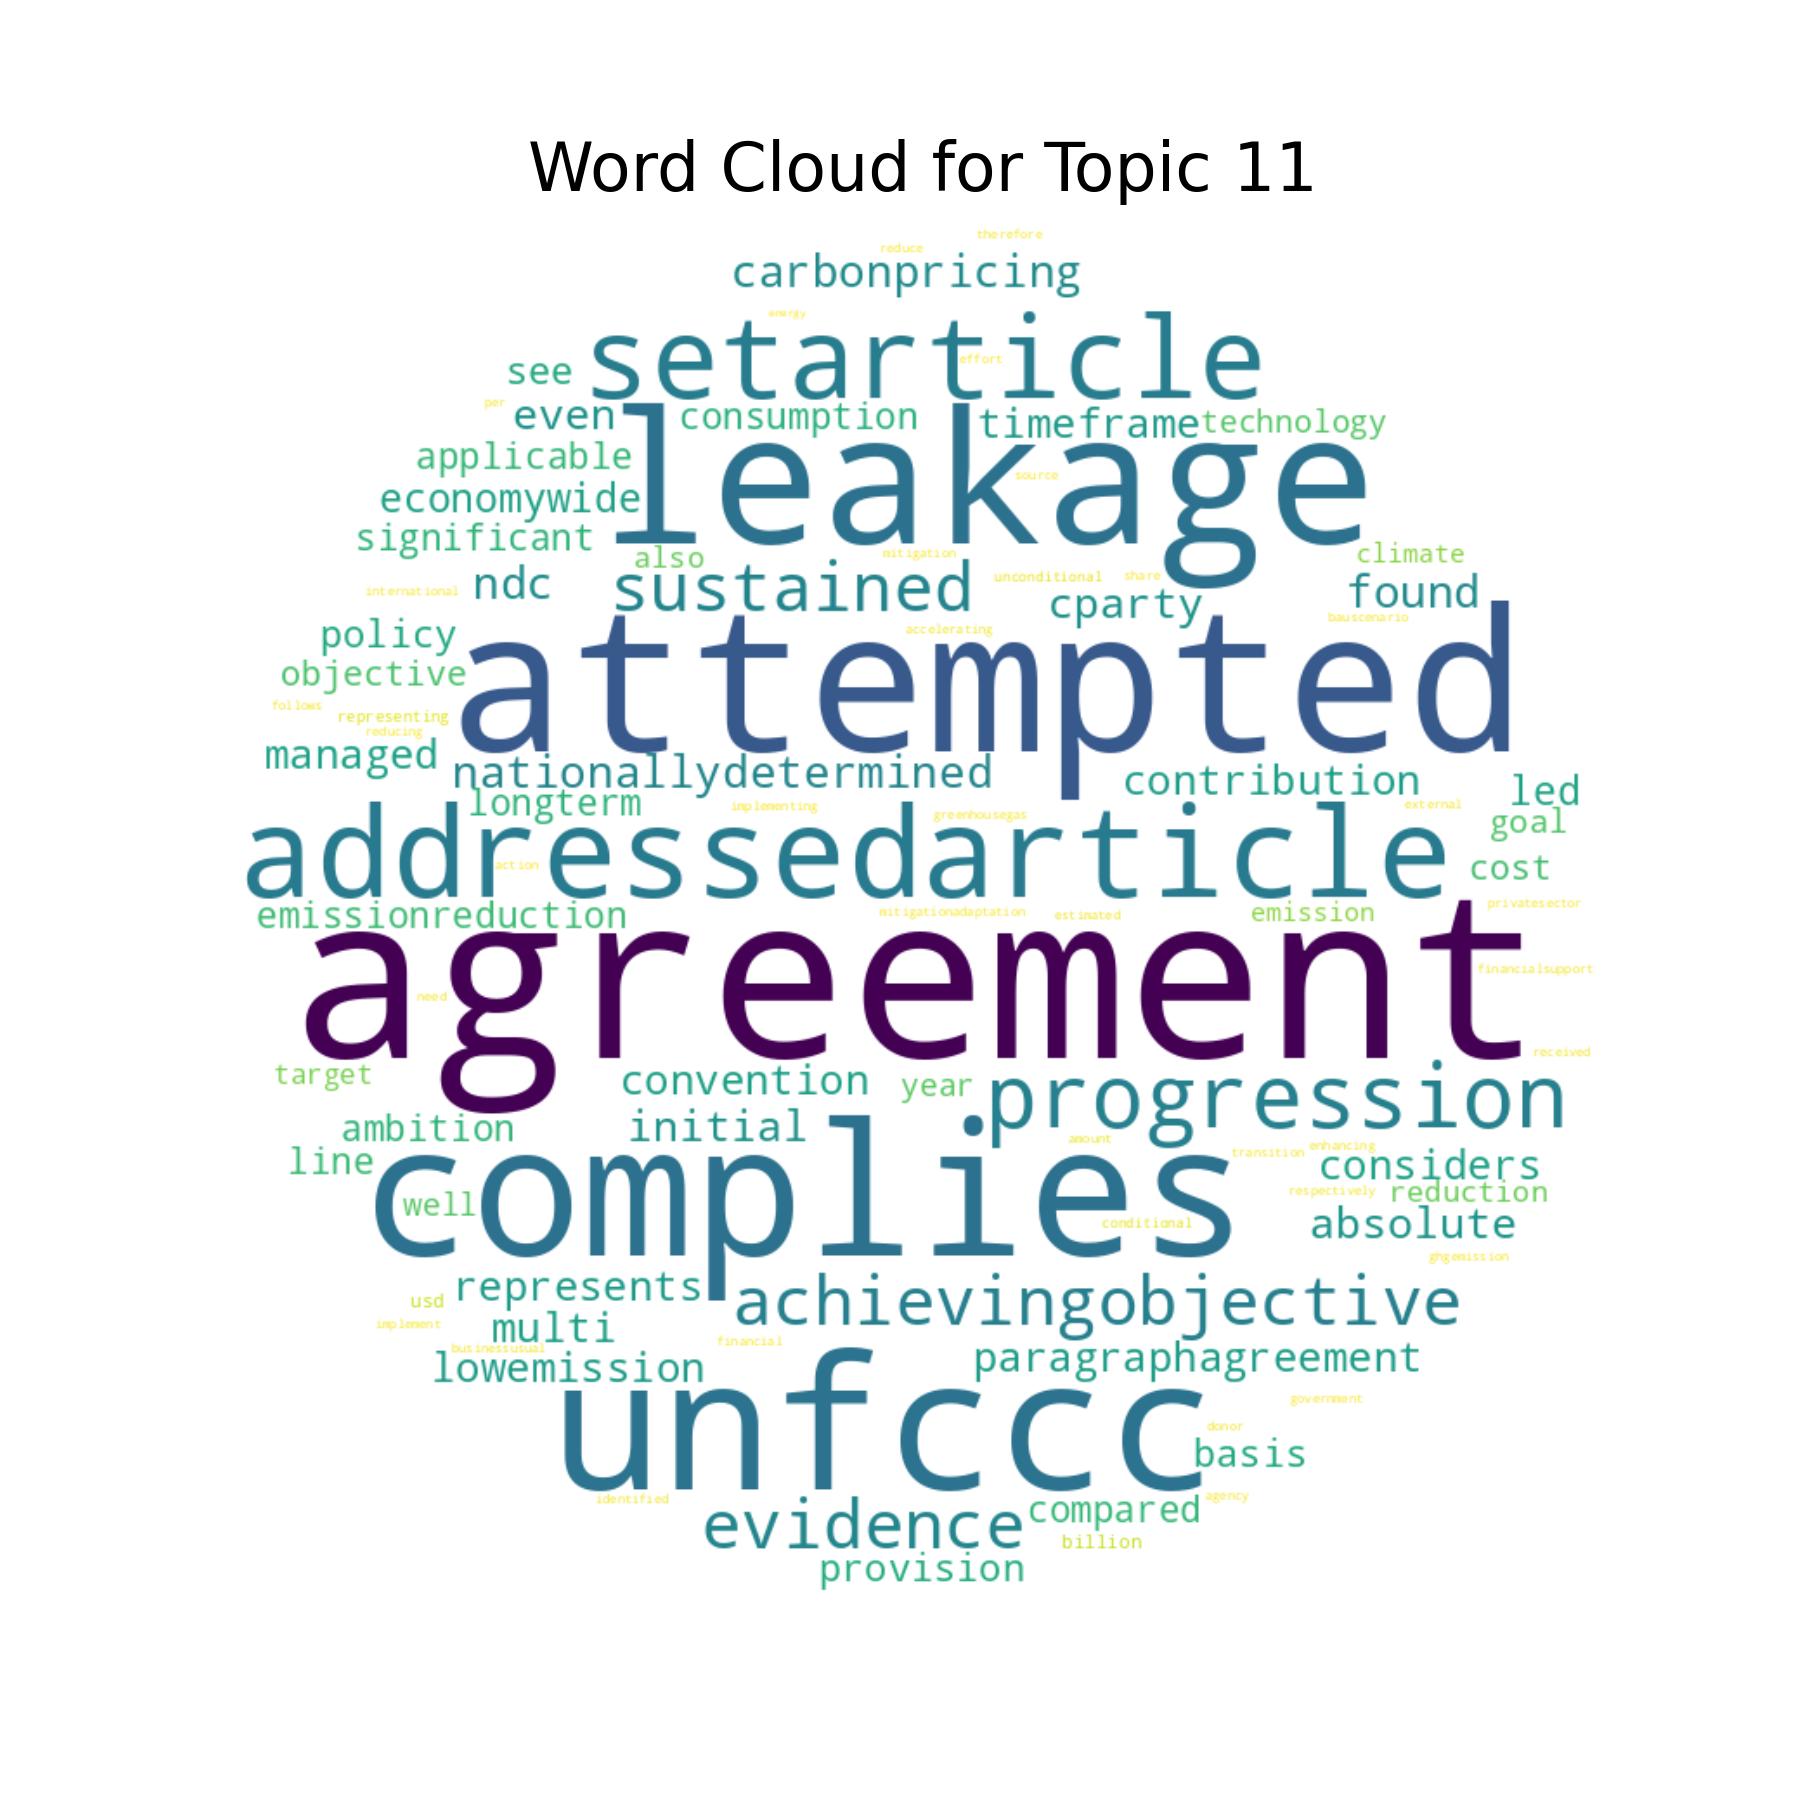 | T31: Aviation and shipping  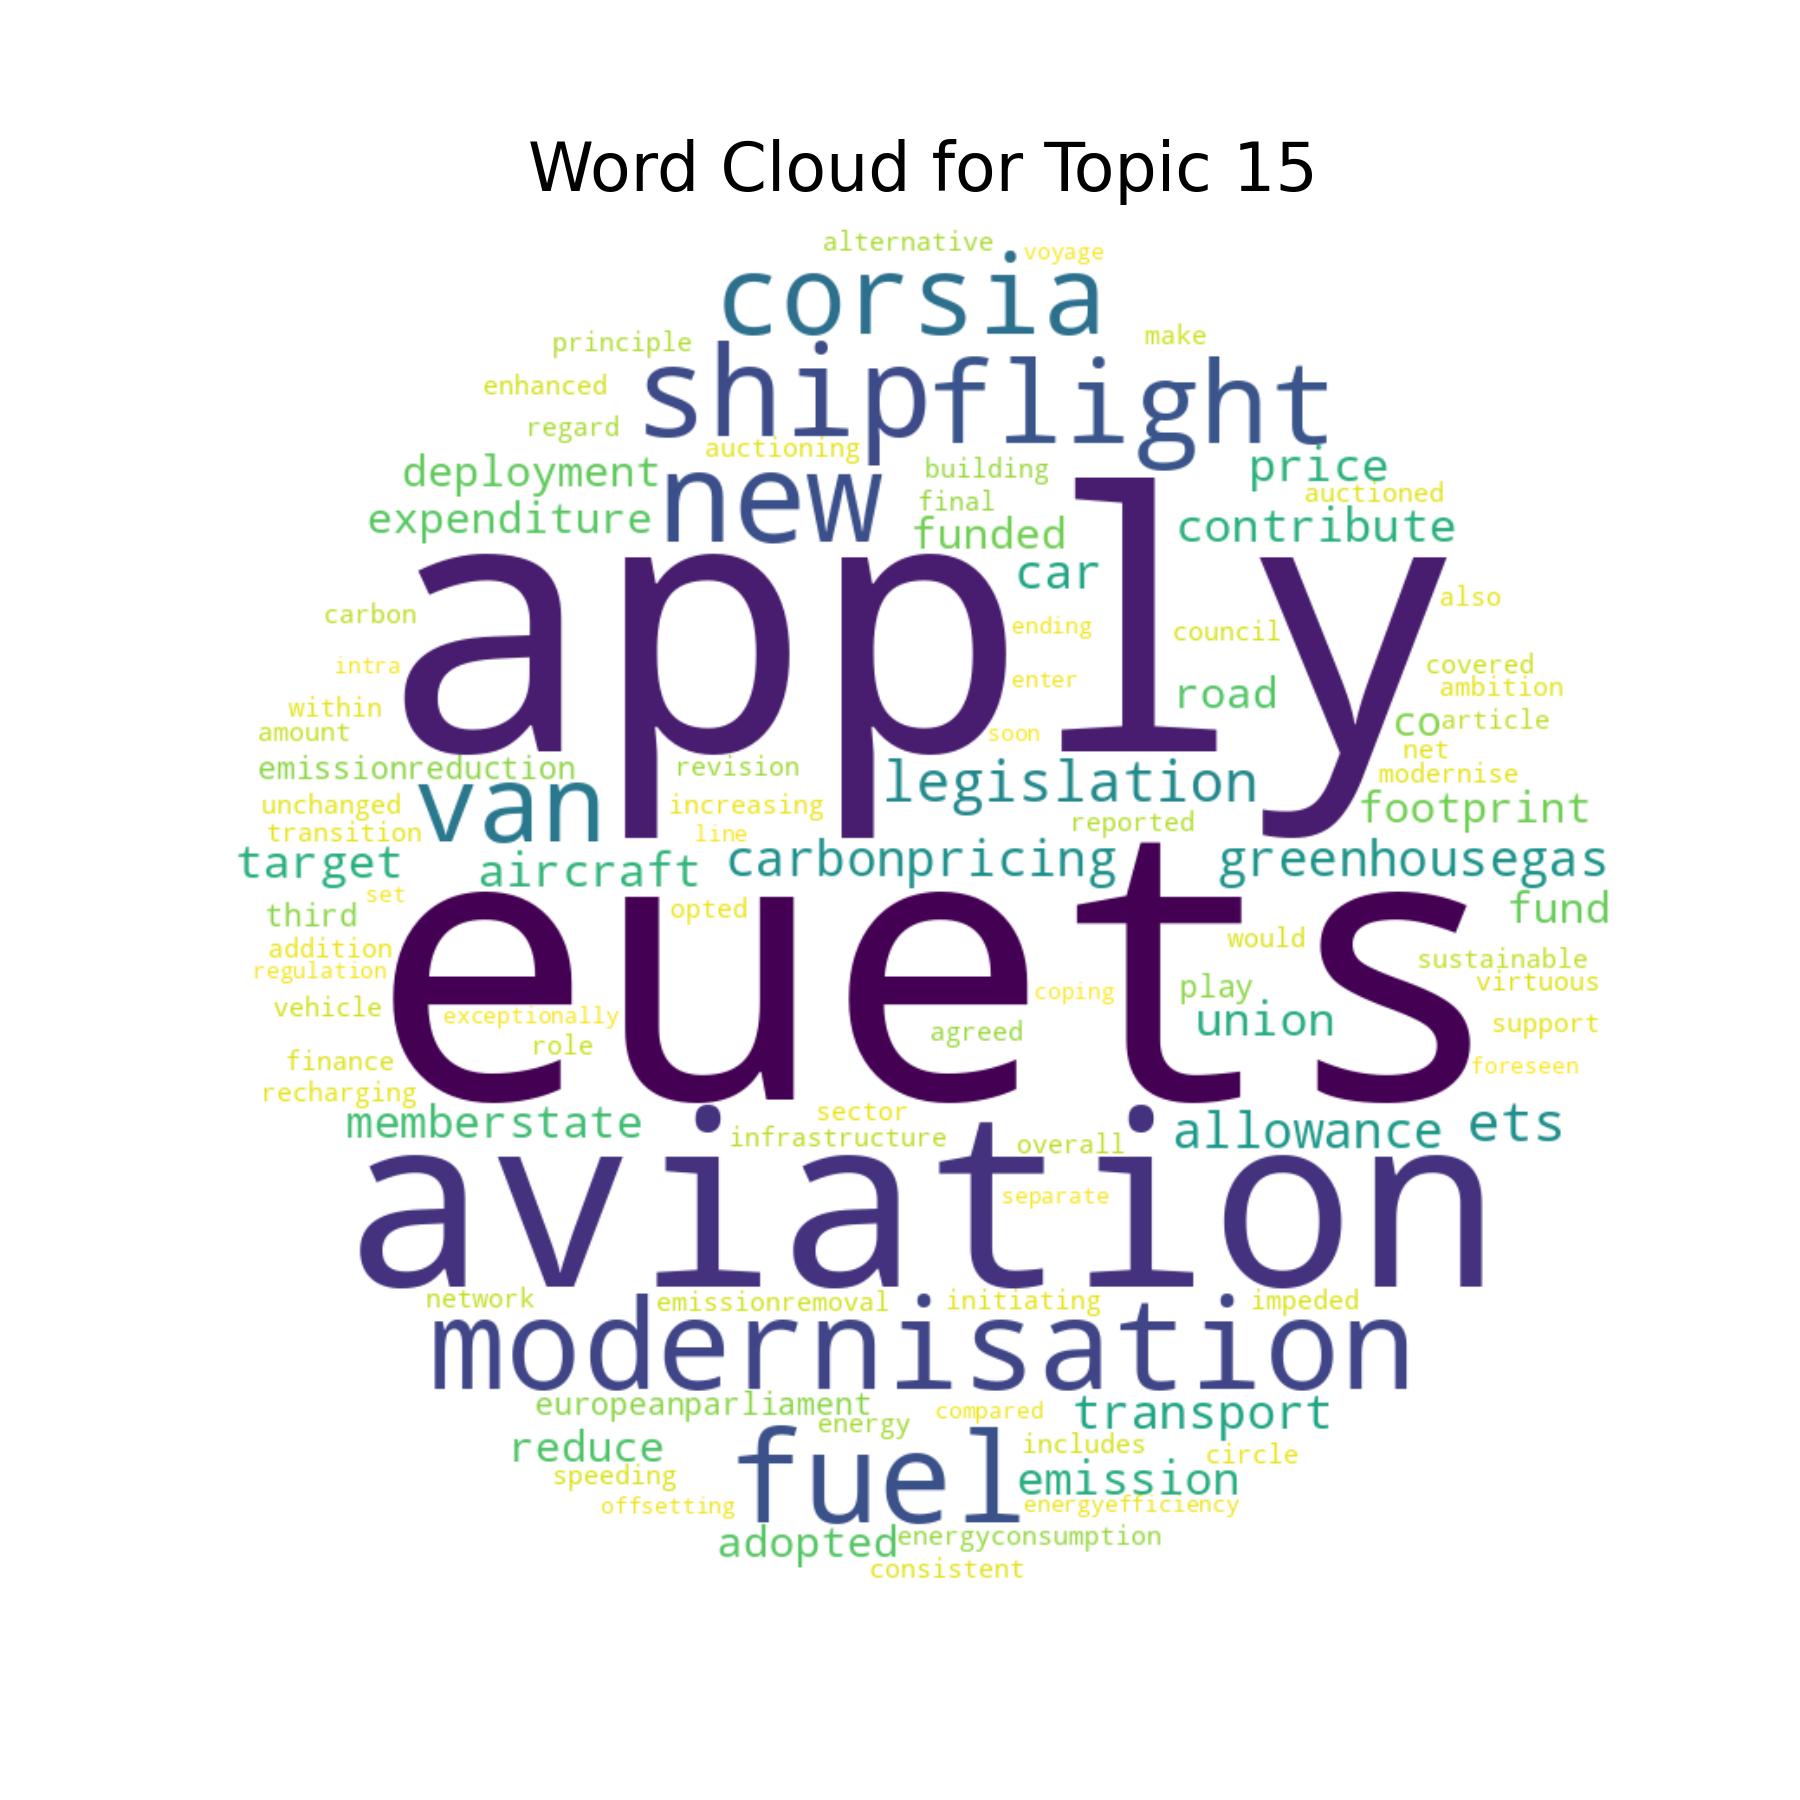 | T32: Carbon removals strategies  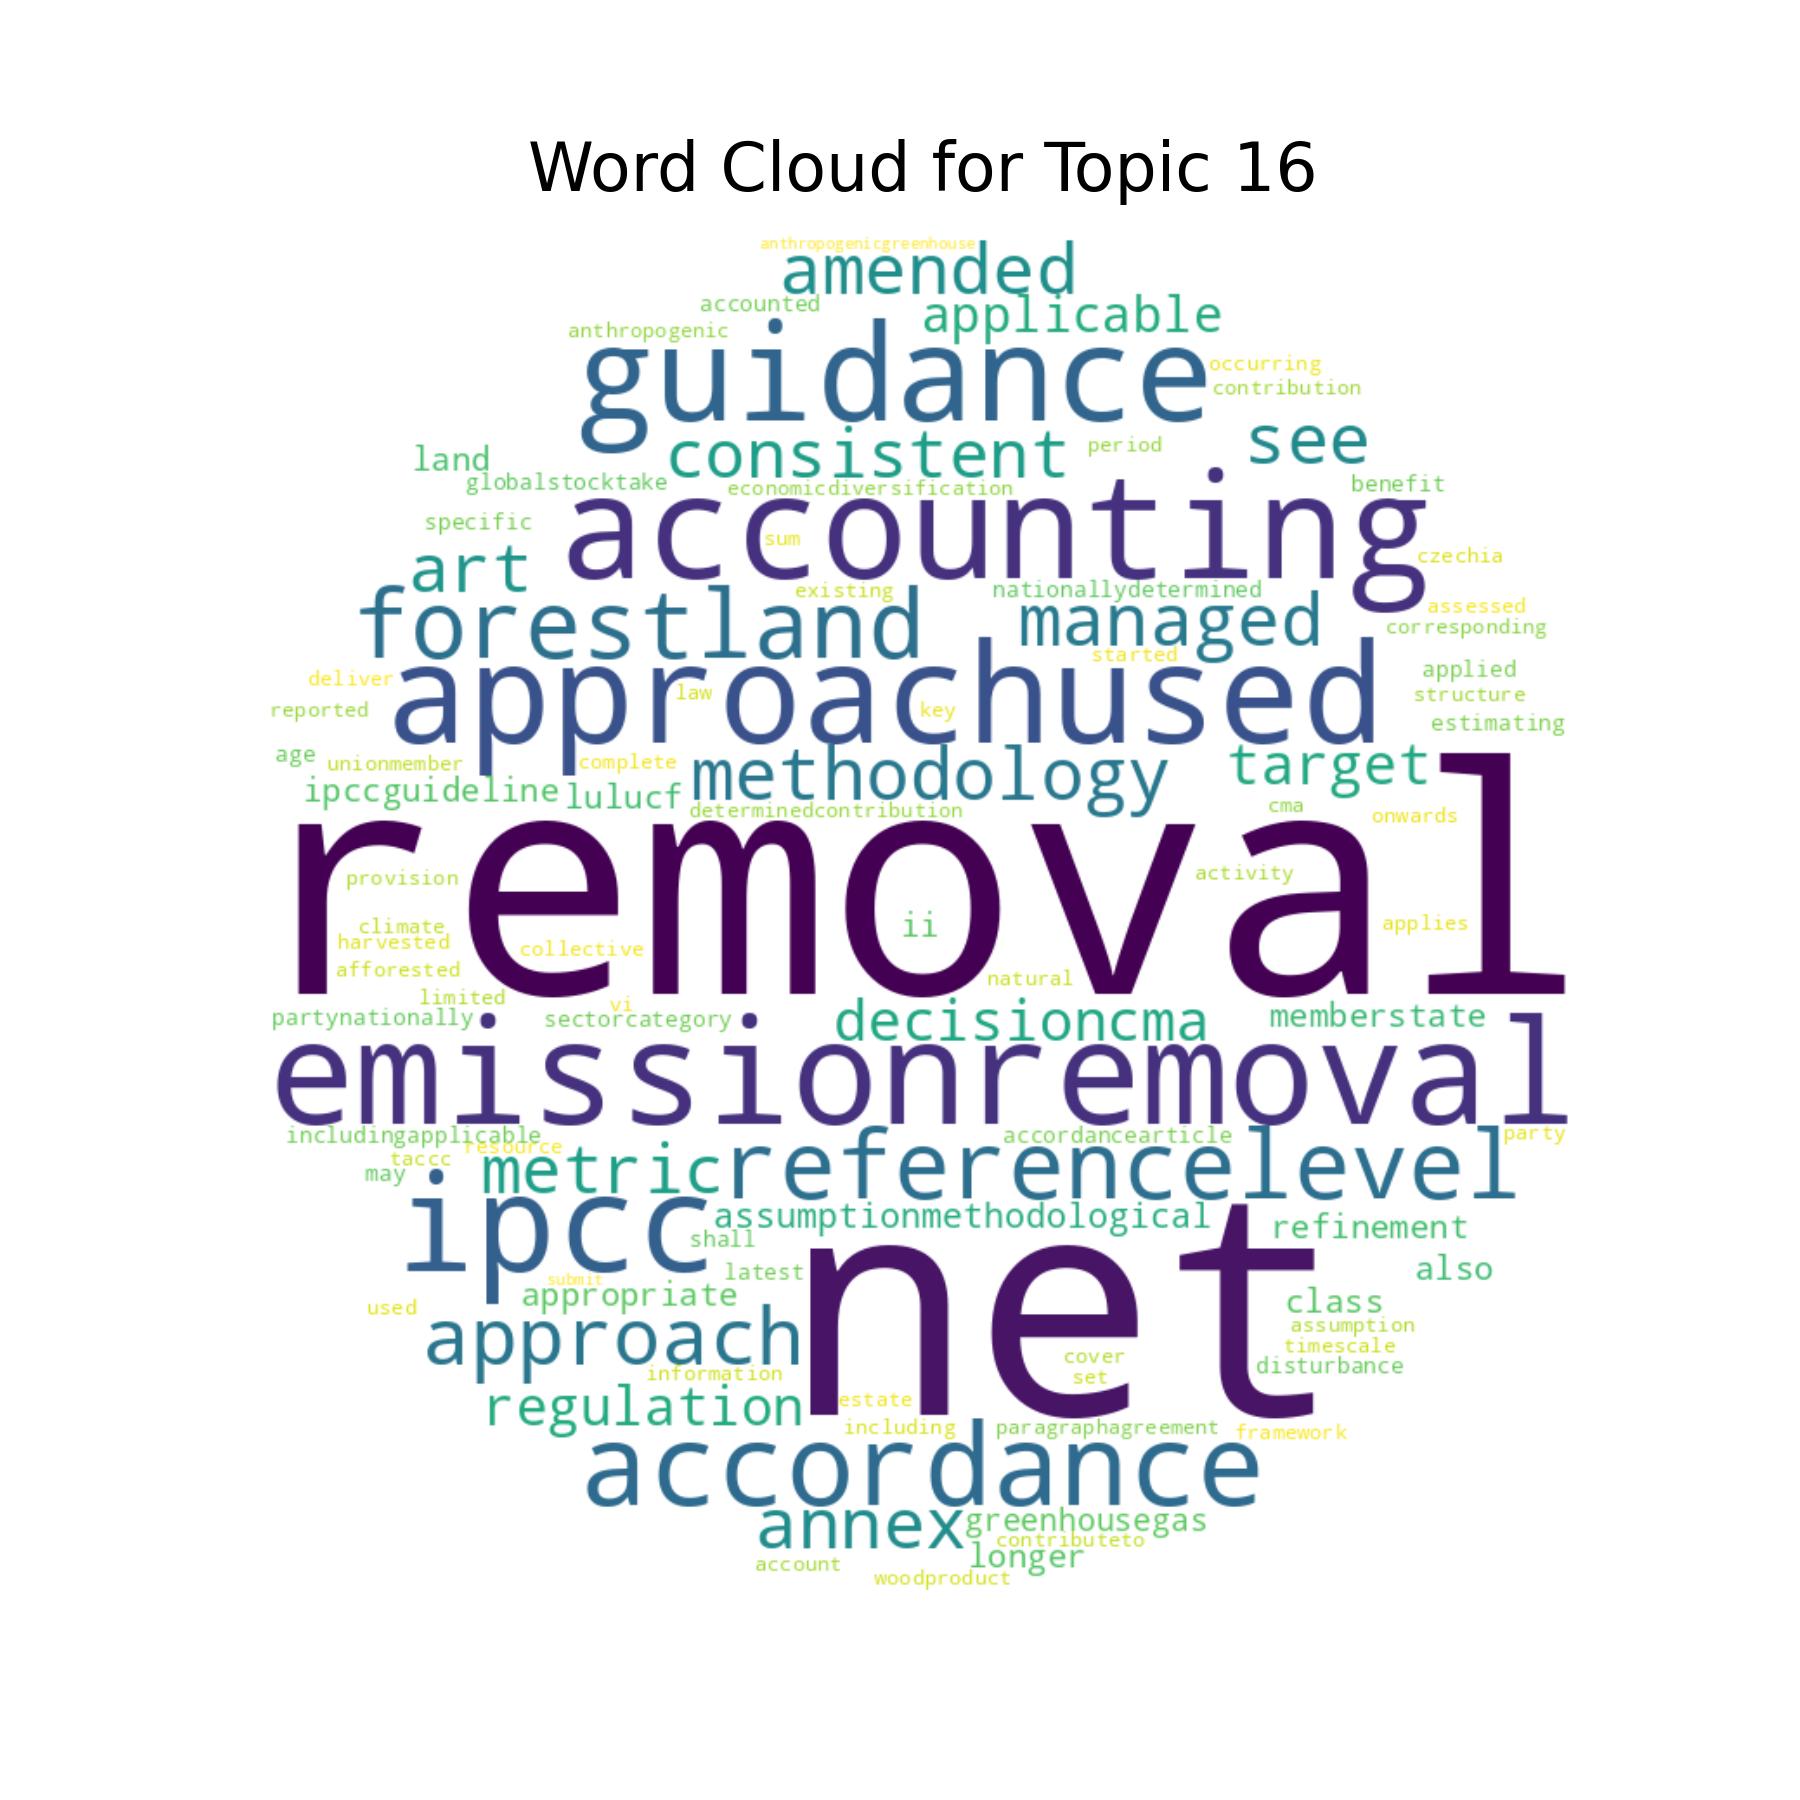 |
| T33: Mitigation instruments  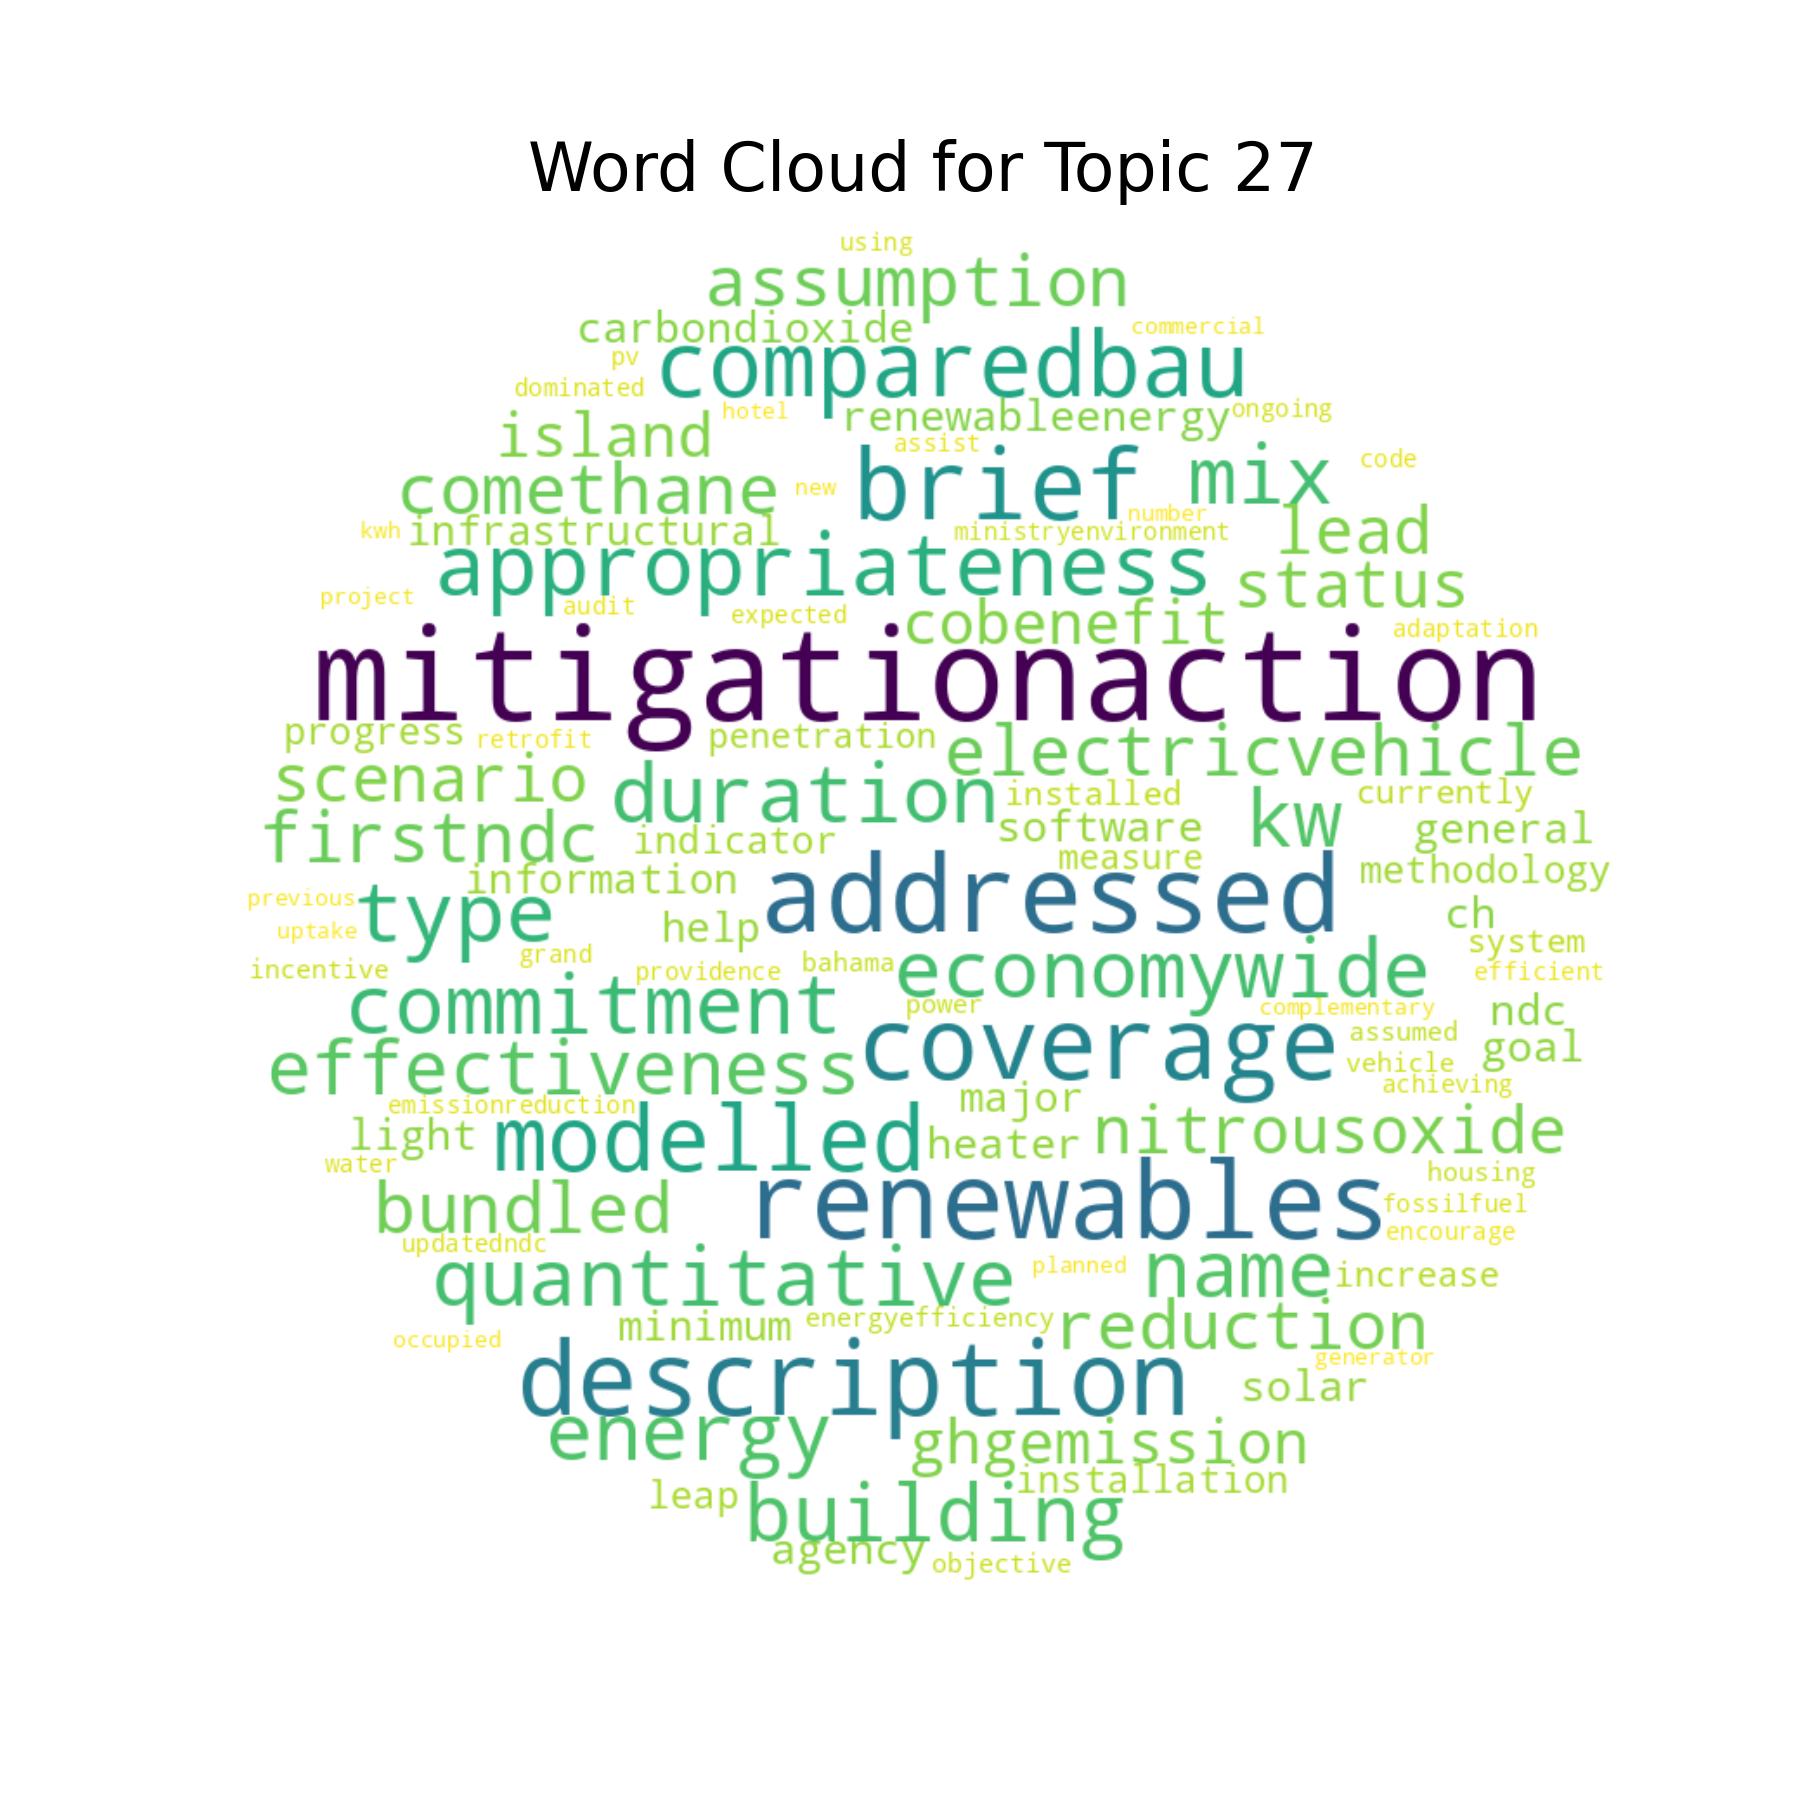 | T34: Loss and damage  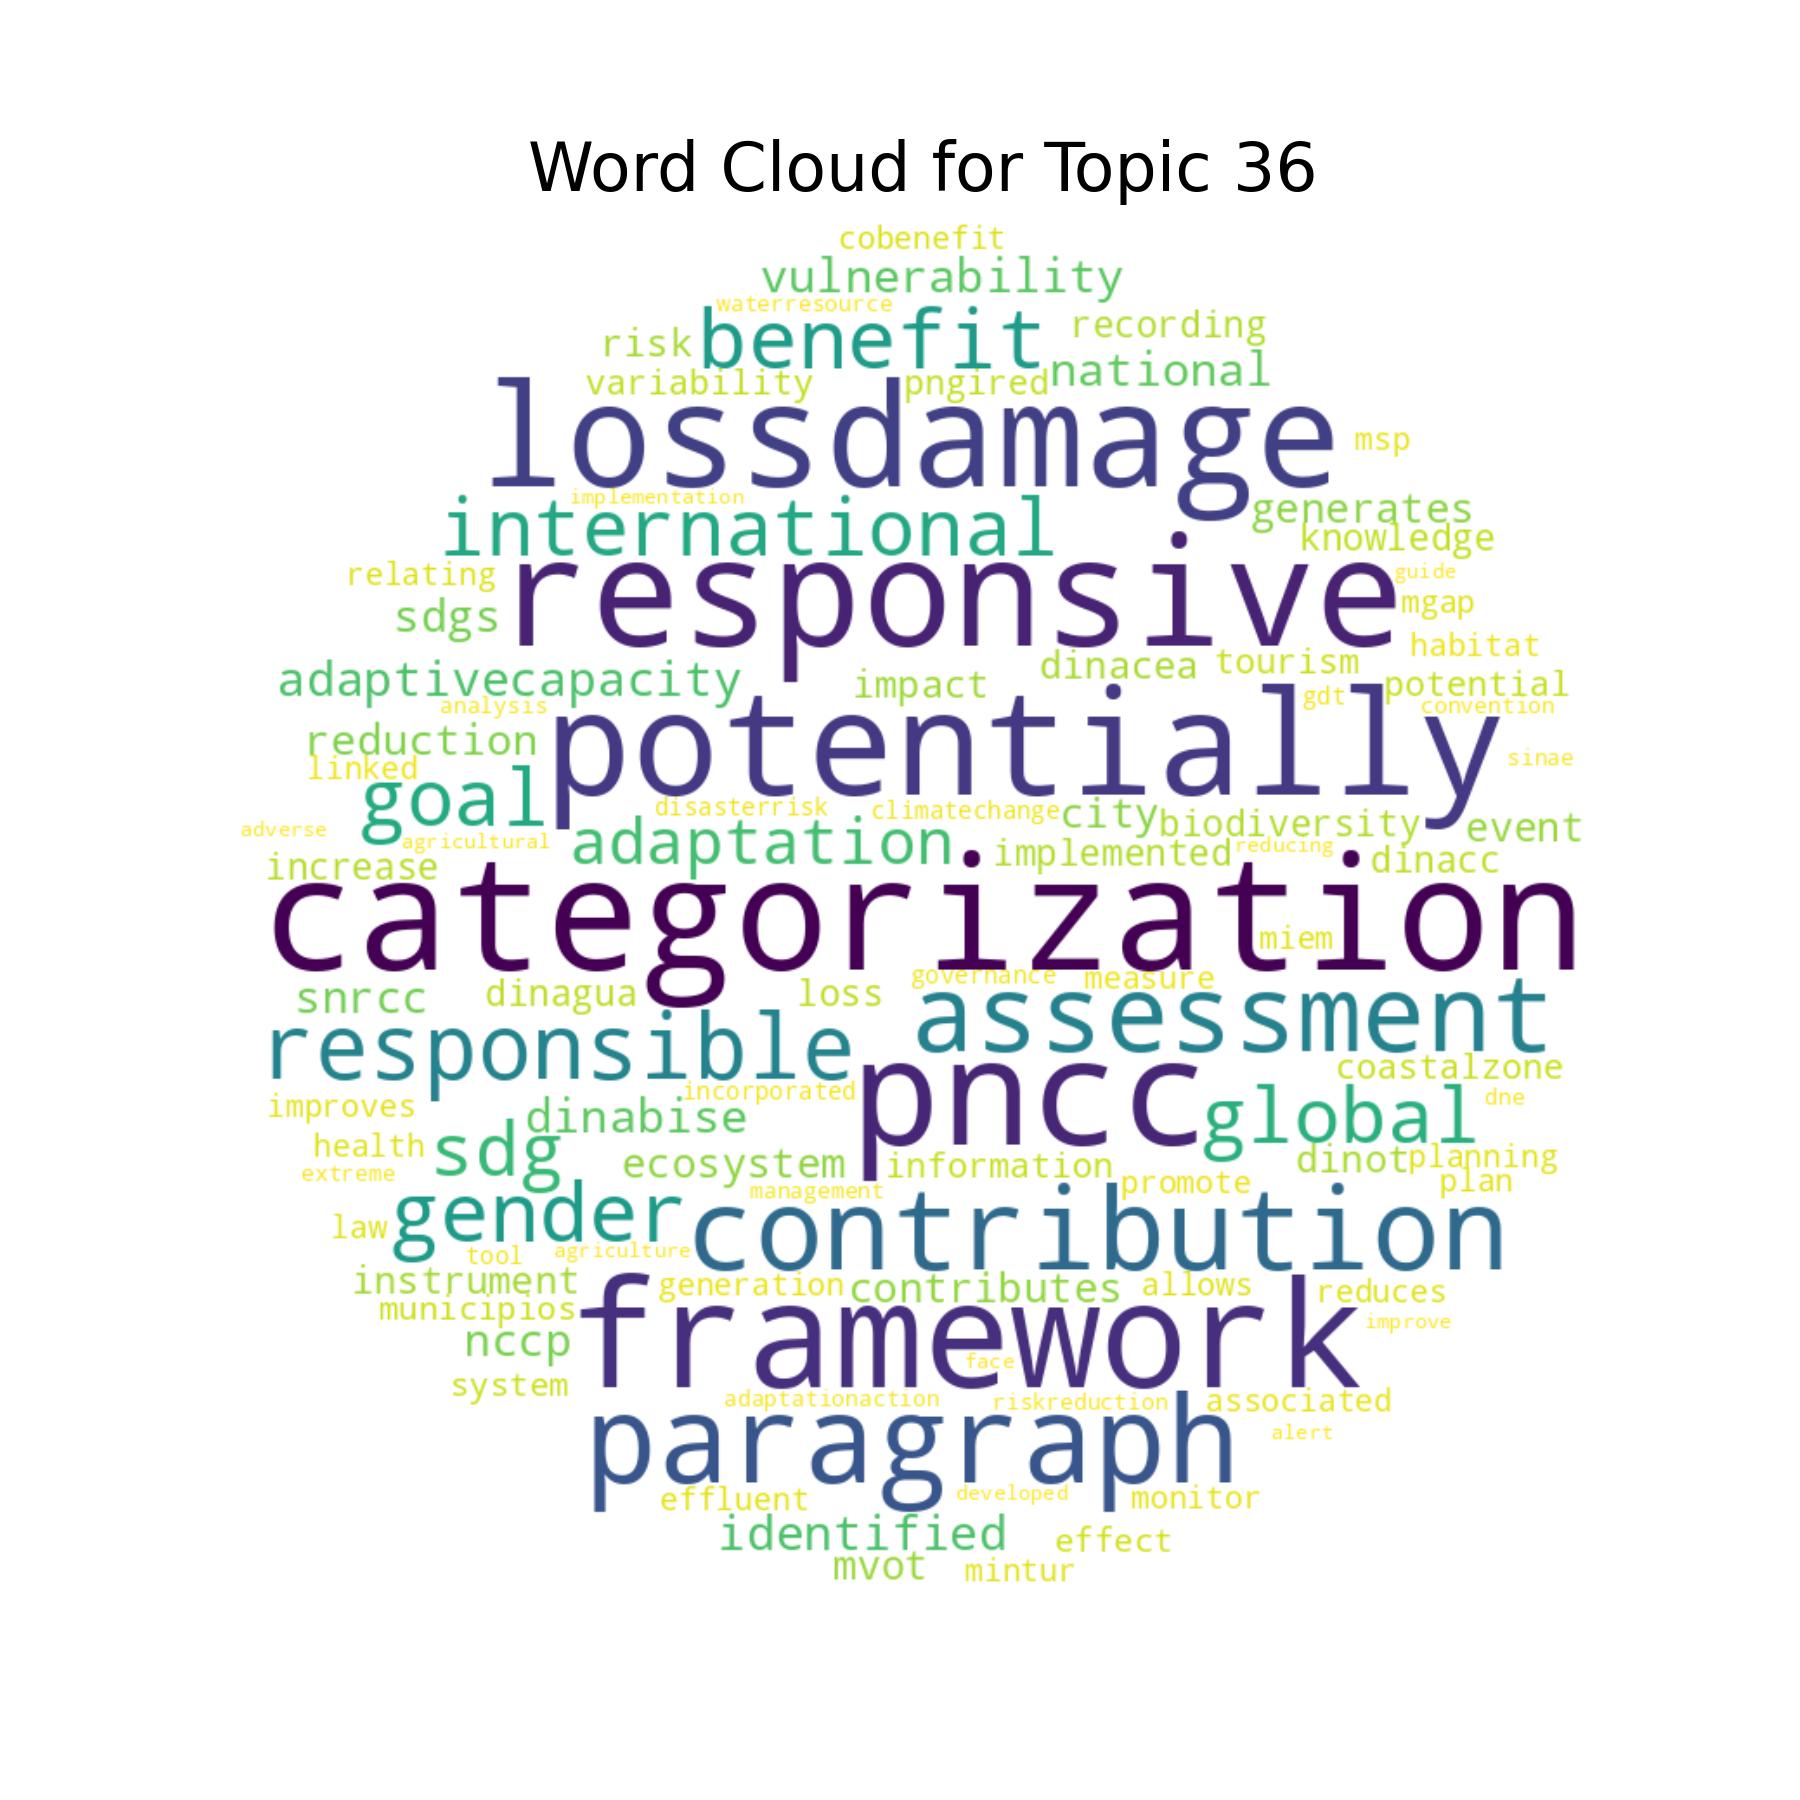 | T35: Energy regulation standards  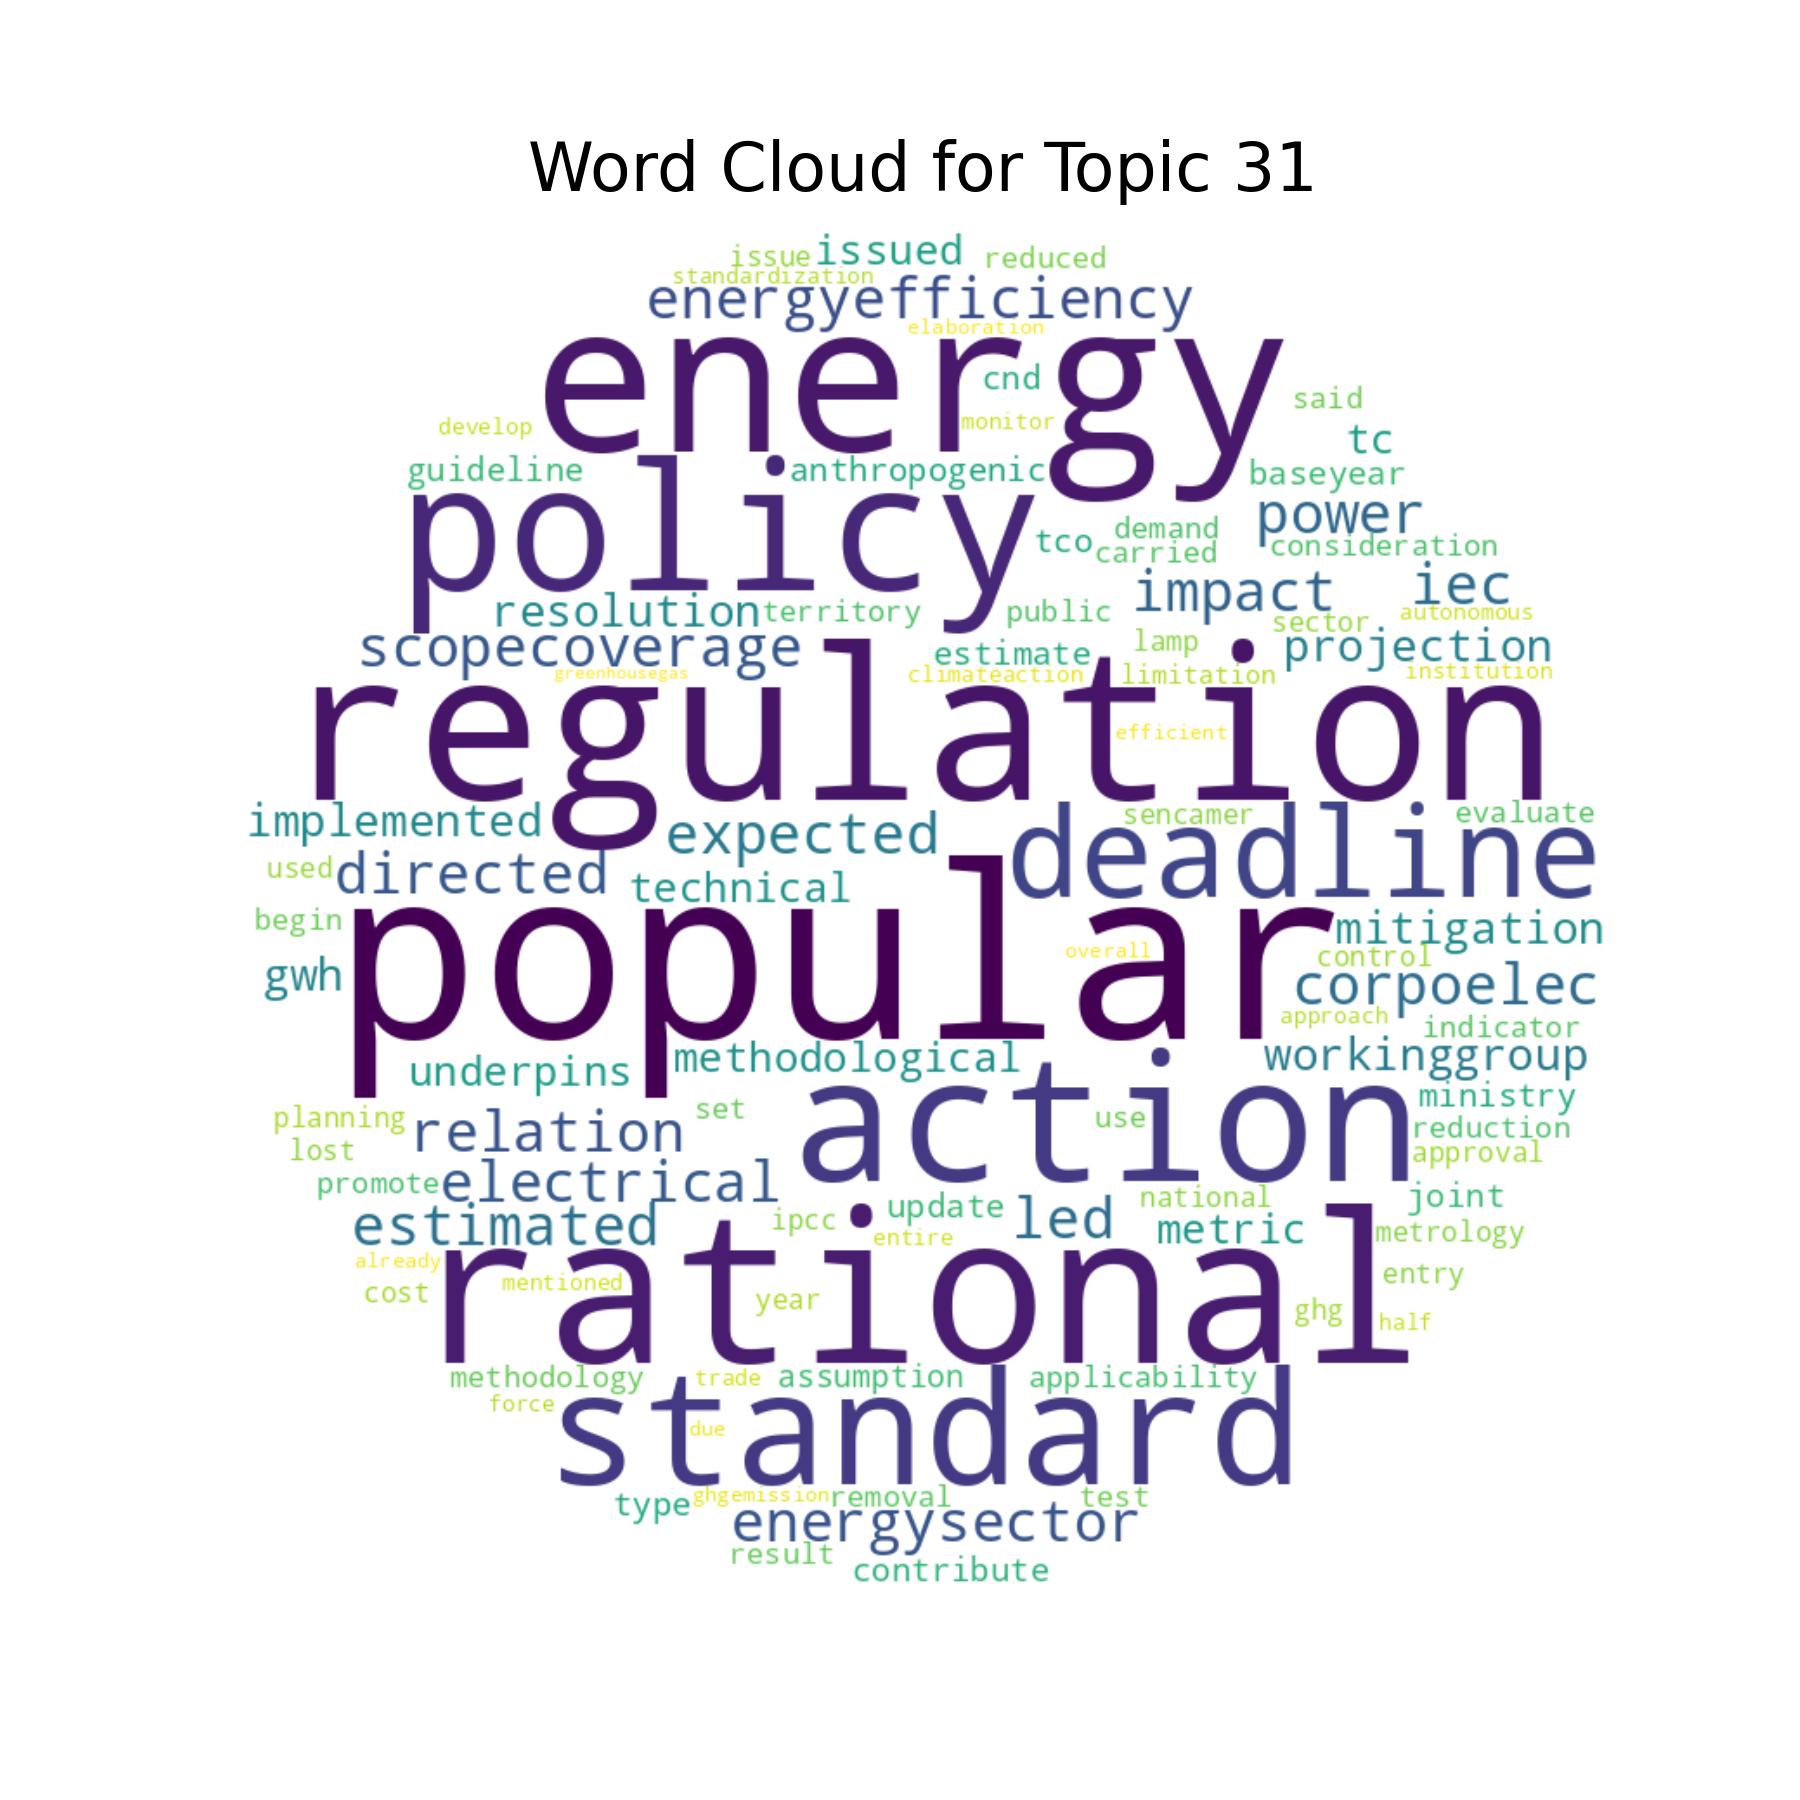 | T36: System transparency  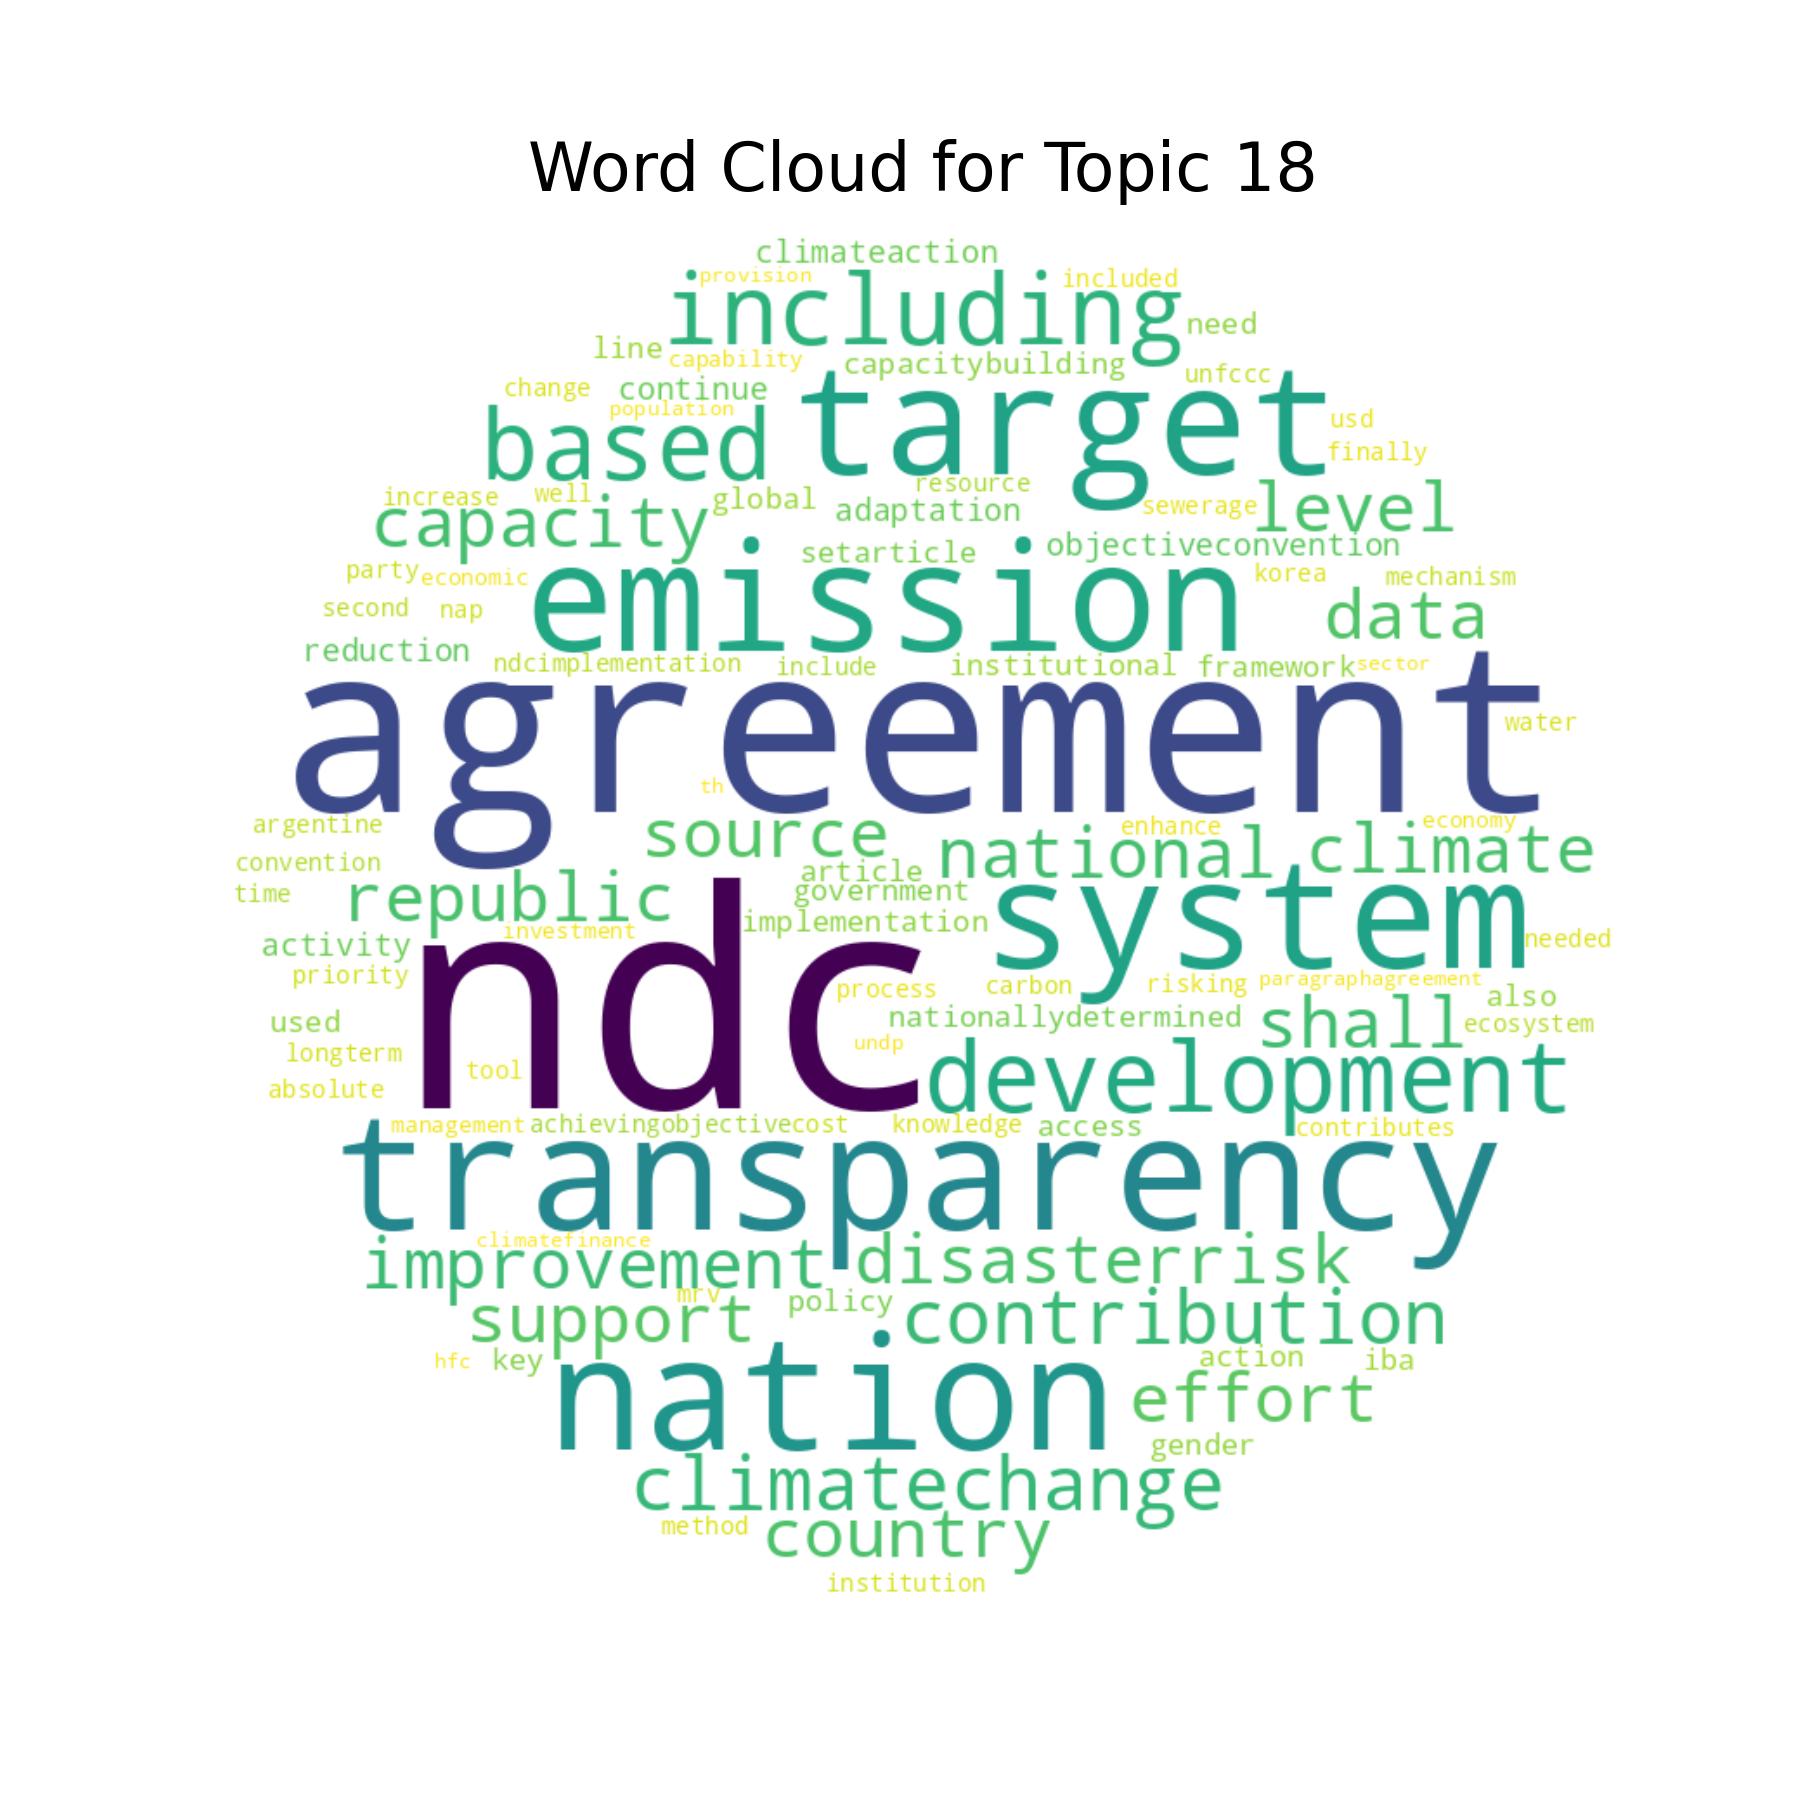 | T37: GHG policy instruments  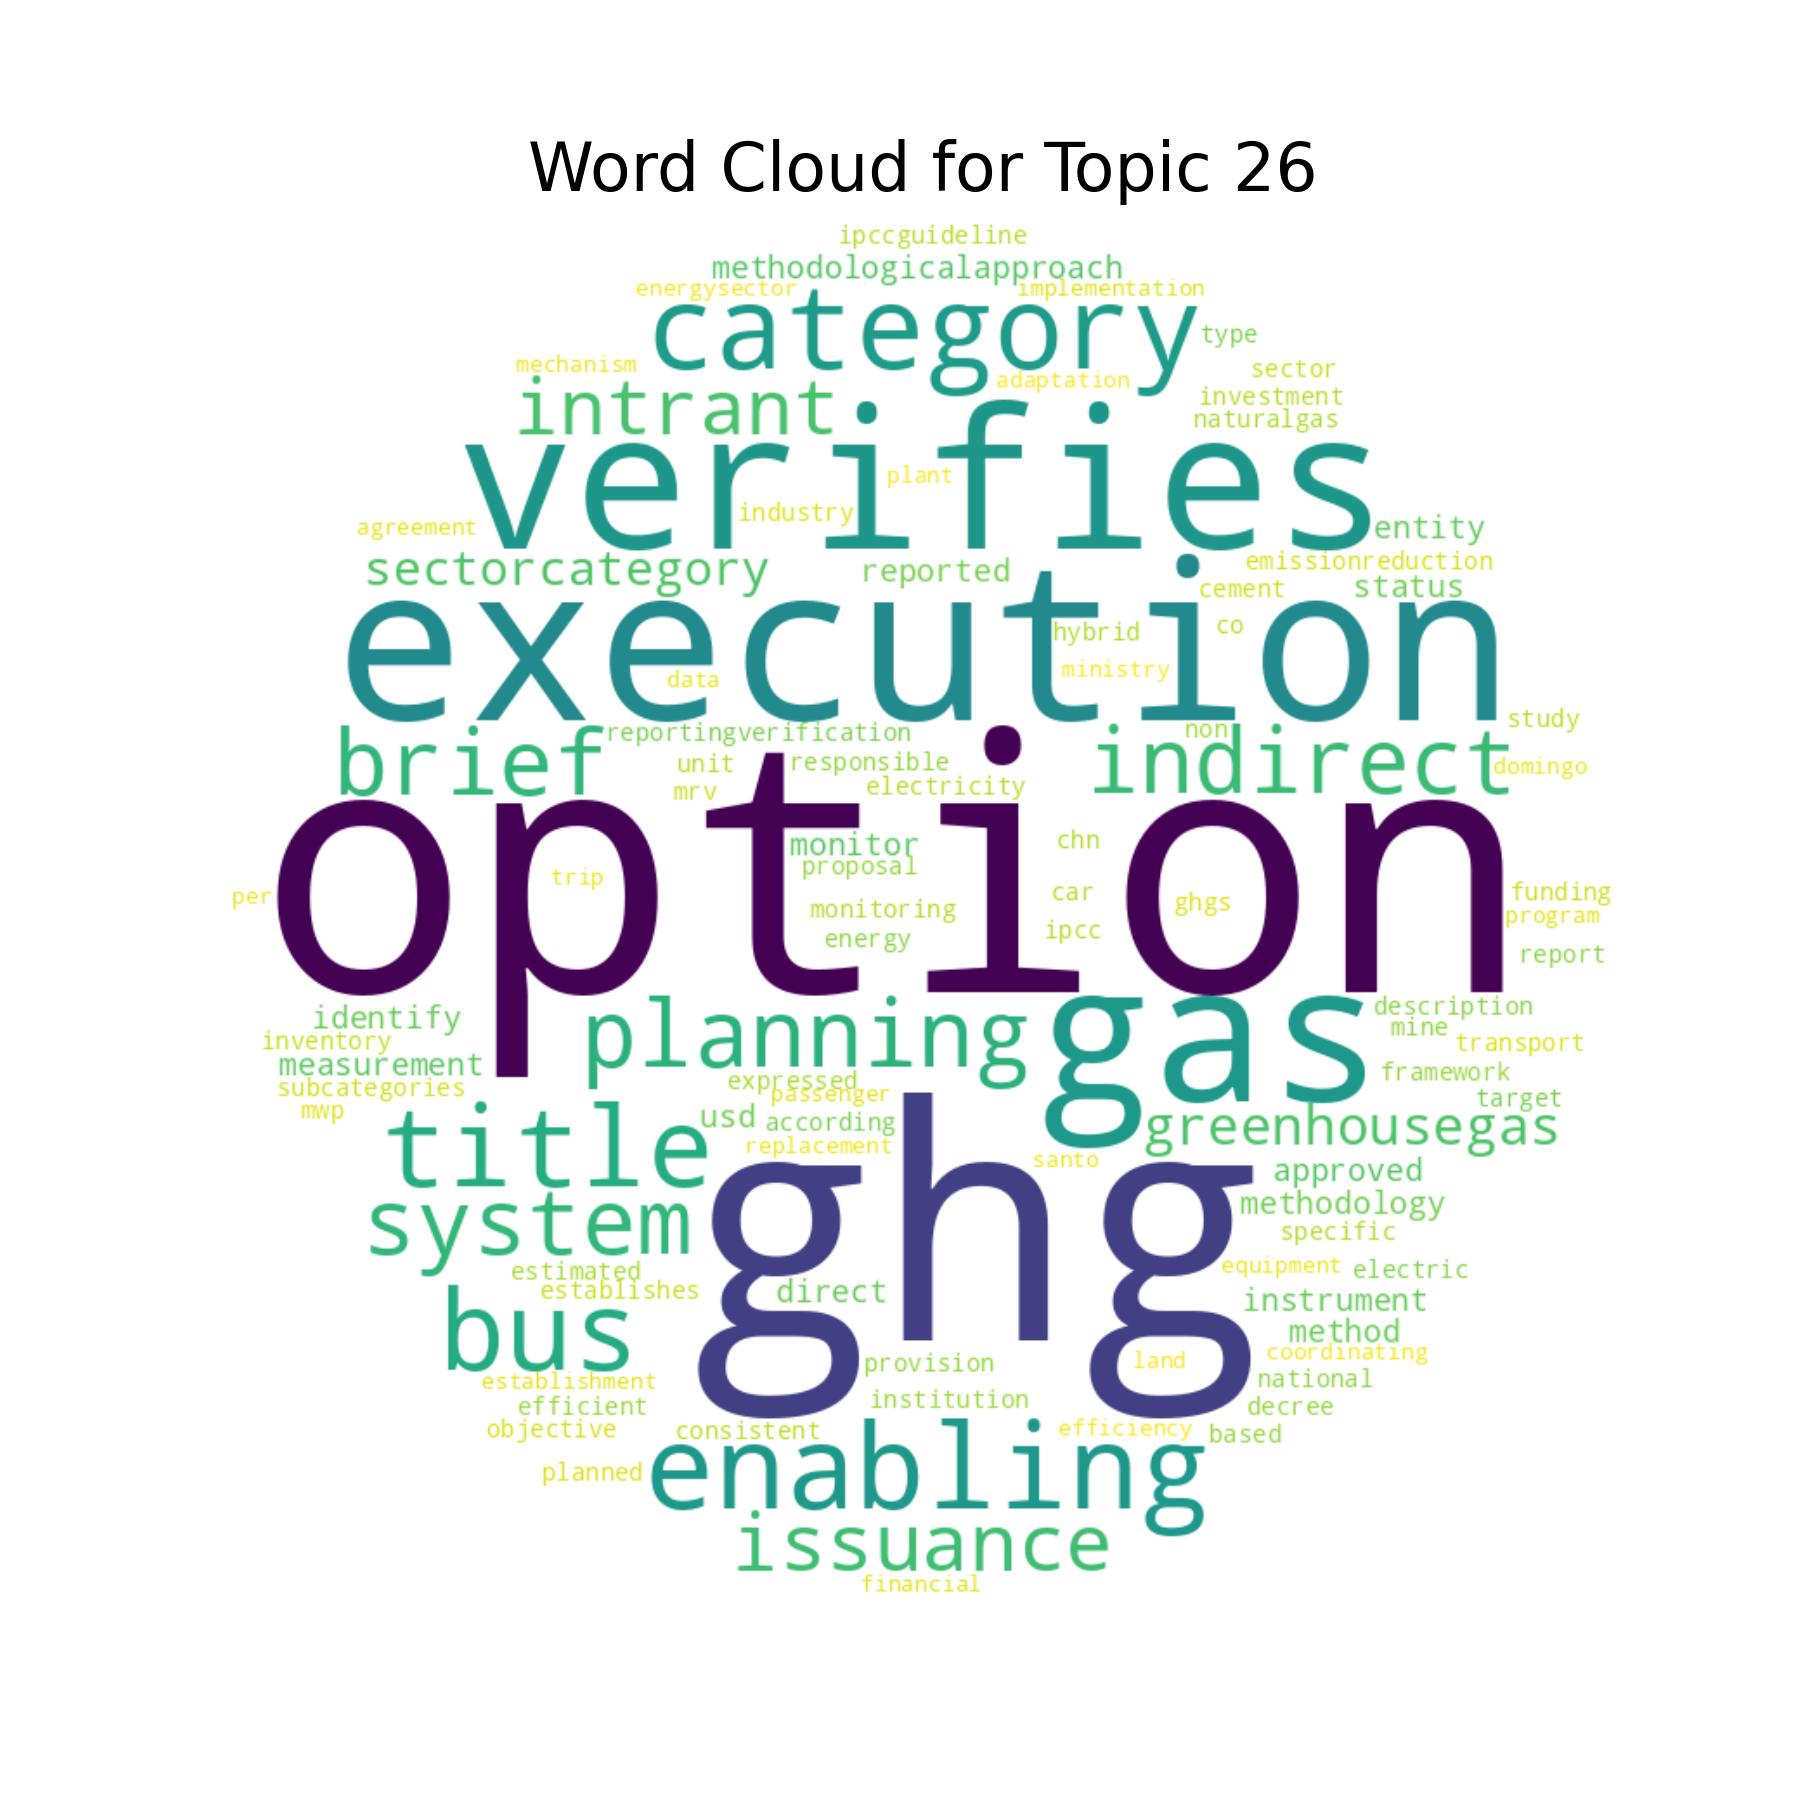 | T38: Climate compatibility  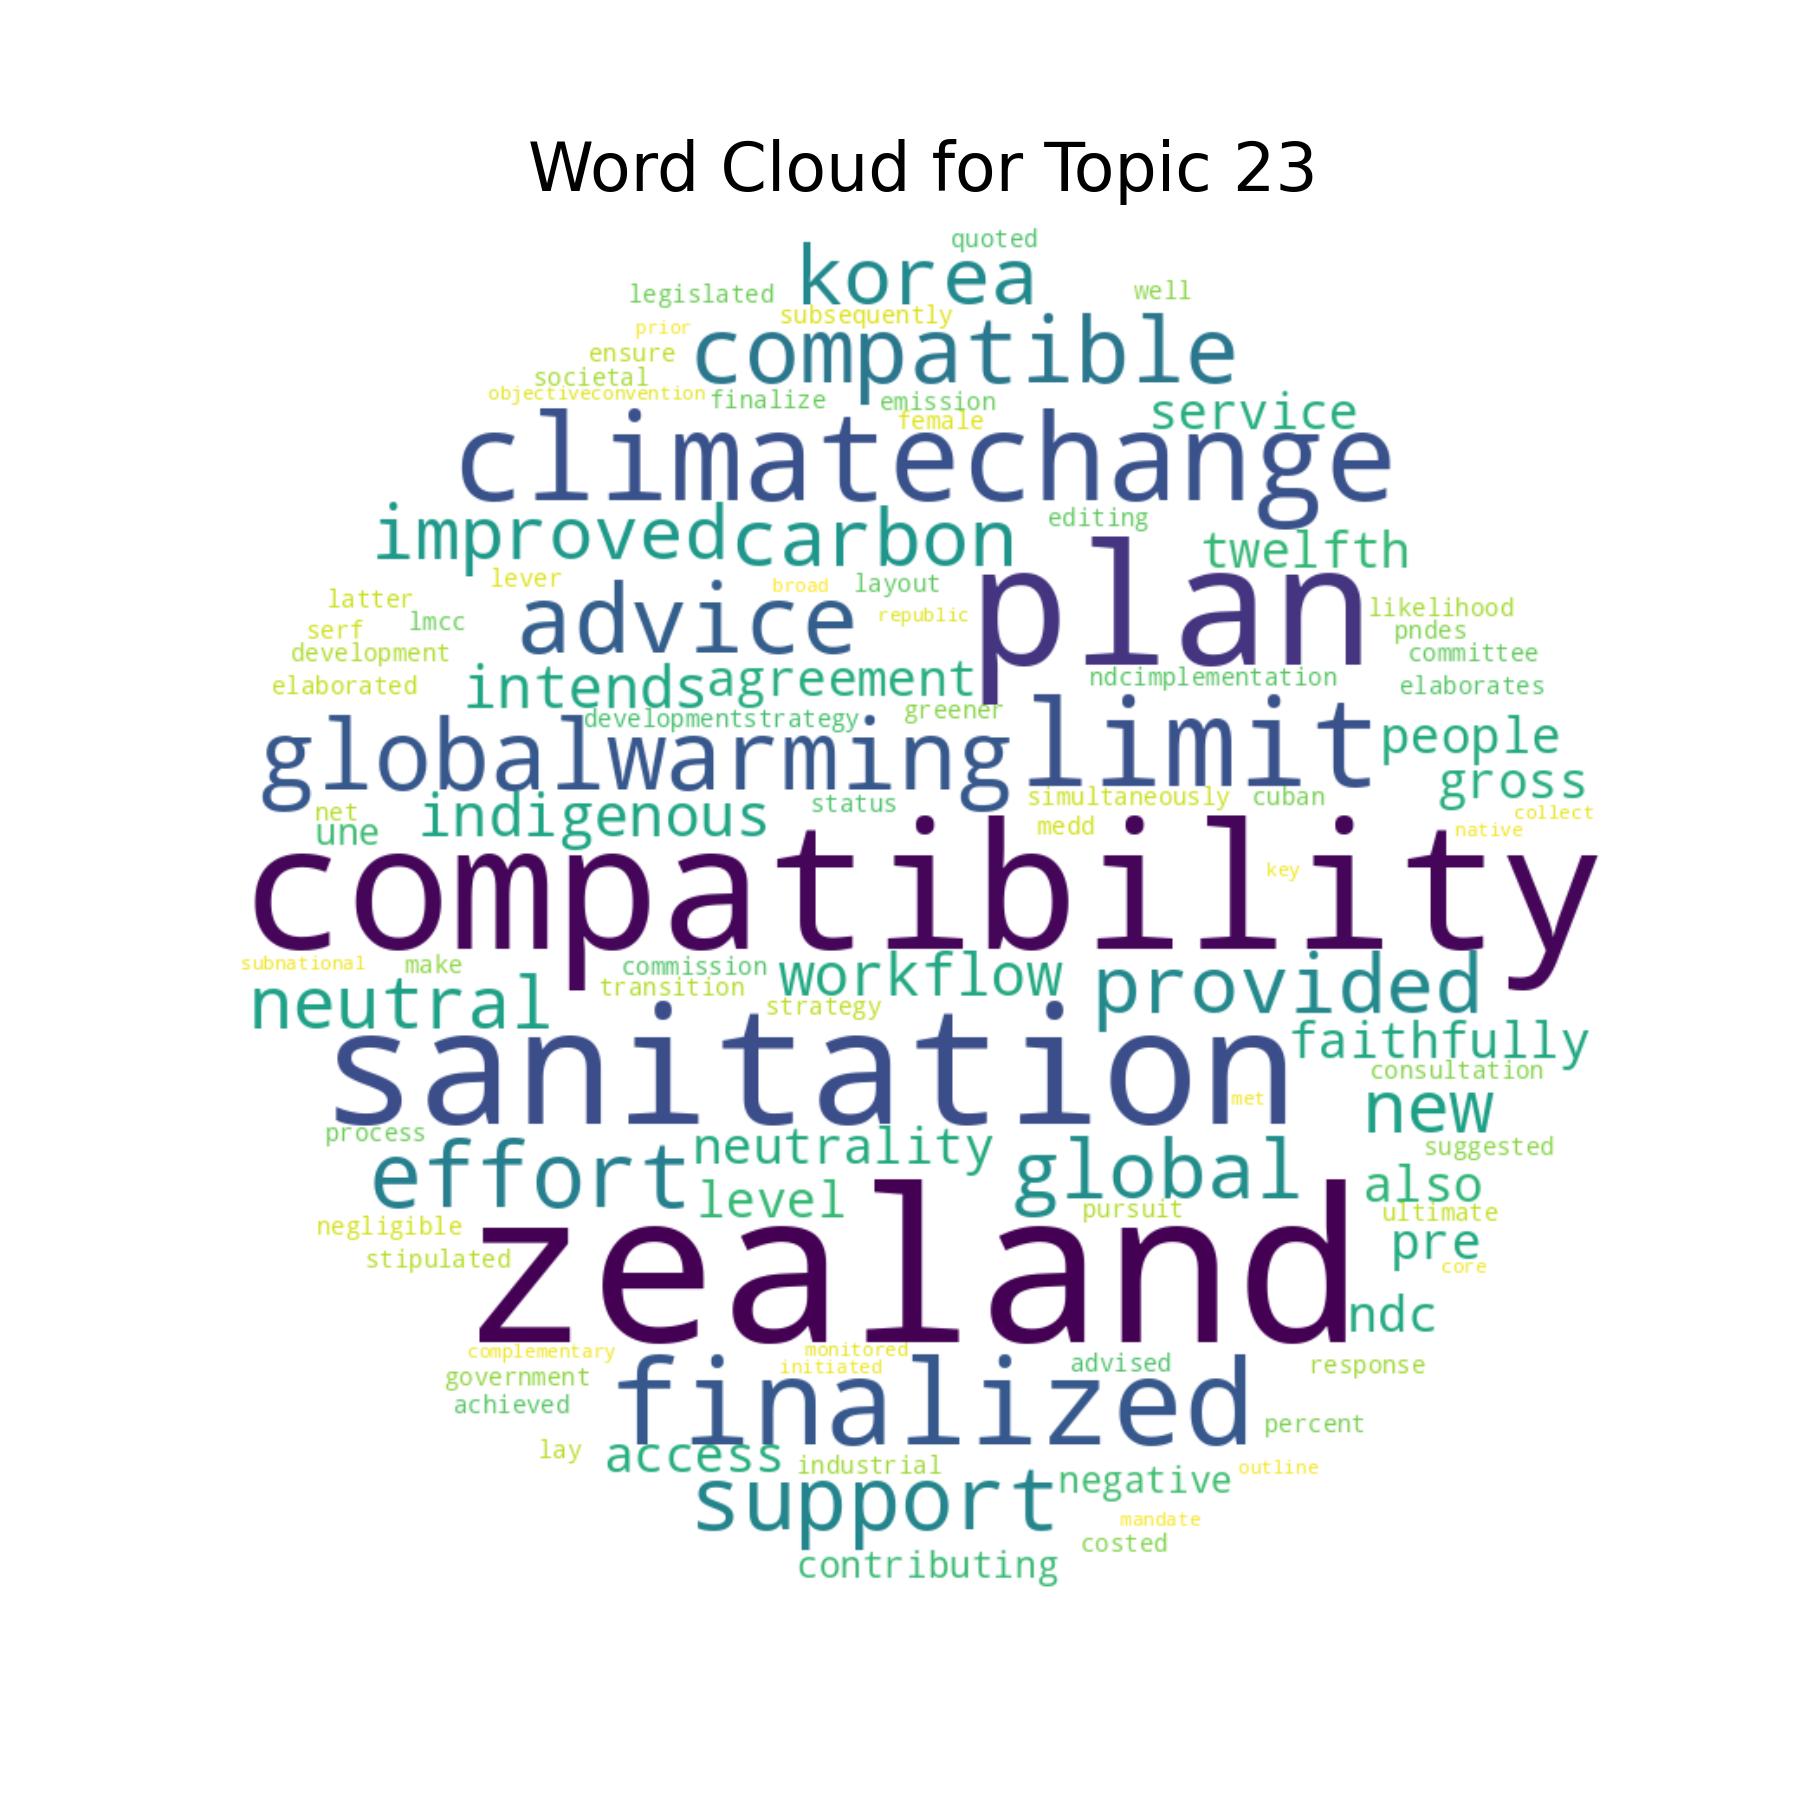 |  |  |

**Figure S3.** Word clouds of 38 topics generated based on NDCs

Sentence 1: “@BelowZeroGames @scottdellinger The Carbon Tax spin was a real conservative tactic win. They pushed it as a burden.”

Sentence 2: “What in the world, Iowa. 70 degrees and 70mph wind in December? #ClimateCrisis”

Sentence 3: “Water Resource is Important!”

Sentence 4: “My manuscript is accepted.”

| 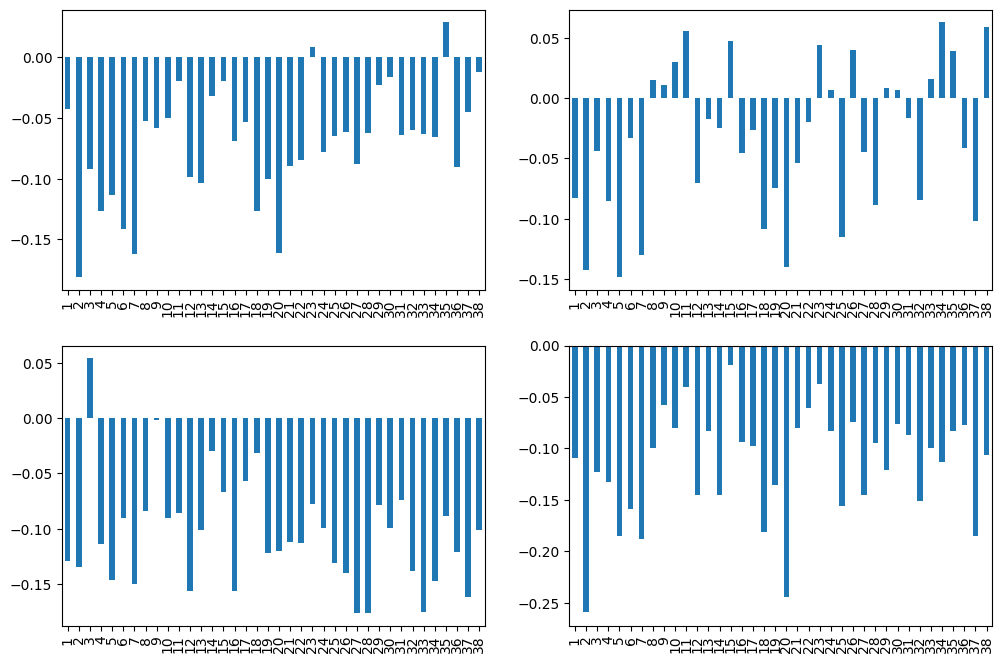 | 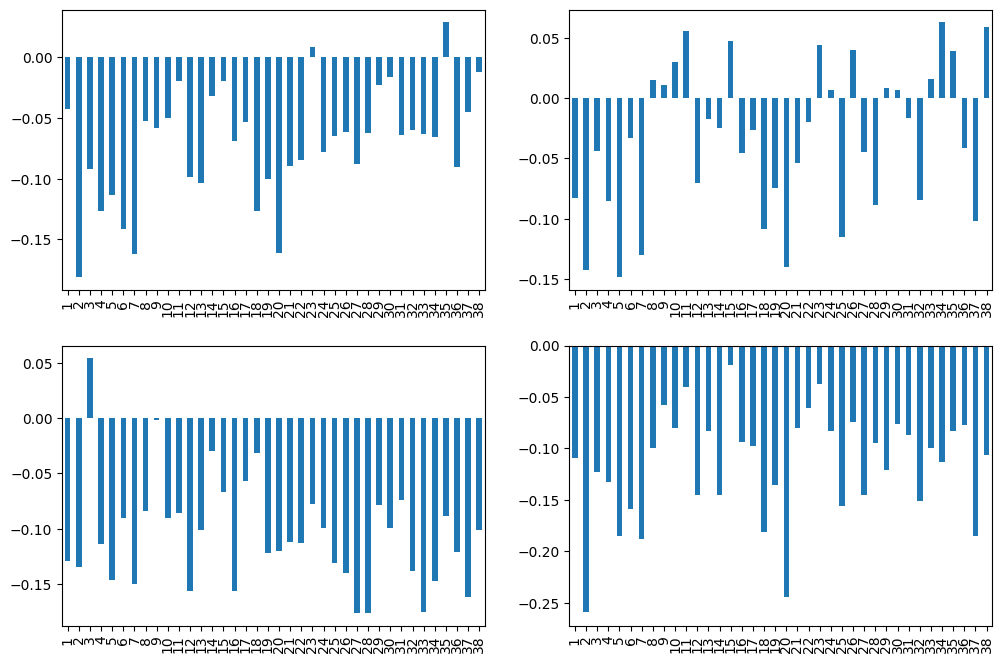 |
| --- | --- |
| (a) Sentence 1 | (b) Sentence 2 |
| 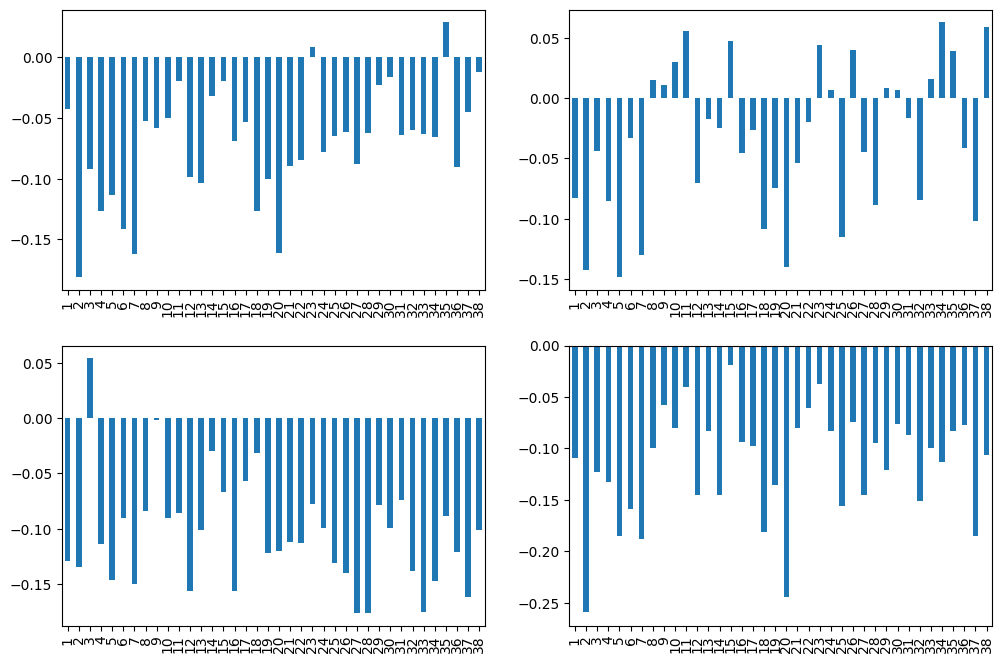 | 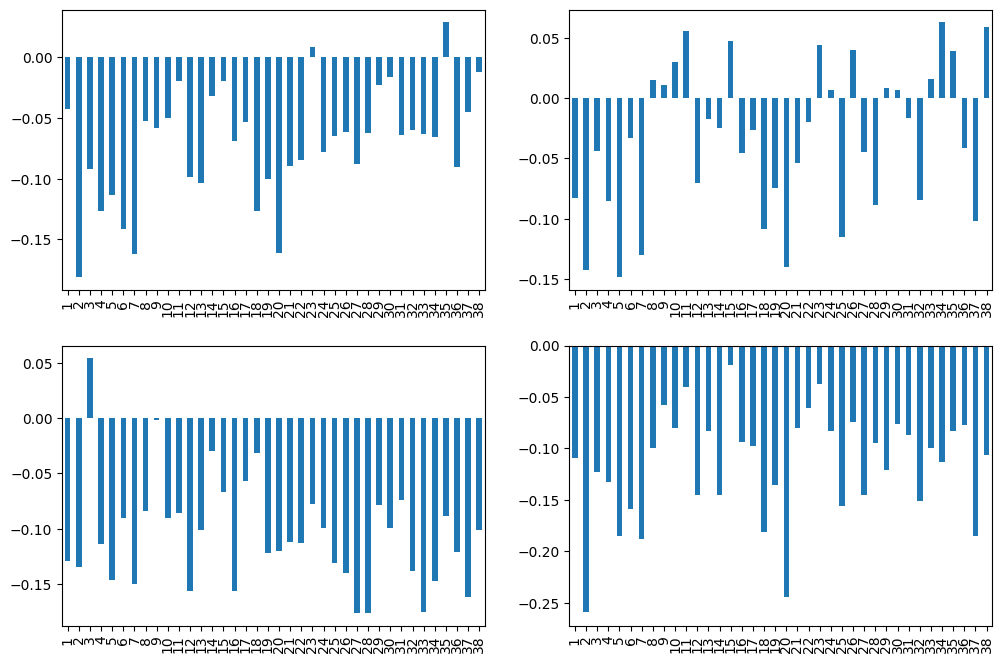 |
| (c) Sentence 3 | (d) Sentence 4 |

**Figure S4.** Topic recall scores of sentence examples. The recall scores have been standardized. We consider a topic to be mentioned in a tweet if the corresponding score is greater than 0. Sentences 1 and 2 are real tweets from our dataset. Sentence 3 and 4 are pseudo samples for comparison.

# Part 2. Supplementary Tables

**Table S1.** Six topic groups, 38 topics, and their descriptions

| **Topic group** | **Sub-topic** | **Description** |
| --- | --- | --- |
| G1: Emission accounting and target | T1: Emission accounting | Greenhouse gas measurement, IPCC guidelines, and alignment with NDC targets |
| T5: Targets and ambition | Emission reduction commitments, global climate goals, and pursuit of higher ambition. |
| T19: Sectoral emission mitigation | Sectoral emissions, BAU scenarios, and policy measures. |
| T23: GHG emissions commitments | National reporting, accounting methods, and global climate objectives. |
| T30: Agreement compliance | Carbon leakage concerns, article requirements, and ambition under international frameworks. |
| G2: Sector mitigation strategies | T2: Renewable energy | Solar energy, renewable energy projects, electricity generation, energy efficiency, and forest sector initiatives |
| T10: Waste and emission | GHG inventories, wastewater treatment, and sectoral evolution. |
| T12: Projects and management | National plans, environmental management systems, and sector‐specific strategies. |
| T17: Resource extraction | Industrial production, extraction intensity, and economic impact. |
| T18: Public transport systems | Public mobility, rail infrastructure, and fuel efficiency standards. |
| T20: Freight and transportation | Public transit, freight logistics, and urban mobility solutions. |
| T26: Ozone and refrigerants | Substance regulation, website references, and forest programs. |
| T29: Net zero strategies | Government policies, air quality, and clean energy transition. |
| T31: Aviation and shipping | Legislation, carbon pricing, and modernization of transport fuels. |
| T32: Carbon removals strategies | Forest land methodology, IPCC guidance, and approaches for emission removals. |
| T33: Mitigation instruments | Economywide scenarios, renewables, and co‐benefit modeling. |
| T35: Energy regulation standards | Efficiency policies, mitigation deadlines, and rational action. |
| G3: Adaptation | T3: Resilience strategies | Water resource management, ecosystem protection, and resilience strategies. |
| T4: Adaptation processes | Policy frameworks, technical support, and capacity building for climate adaptation. |
| T6: Climate impact | Rising temperatures, changing rainfall, and population exposure to extreme events. |
| T11: Environmental ministries | National objectives, forestry efforts, and health research. |
| T34: Loss and damage | Risk assessment, global adaptation, and gender inclusion. |
| T38: Climate compatibility | Climate neutrality, global warming limits, and indigenous advice. |
| G4: Governance and regulation | T7: Governance and direction | Government ministries, institutional arrangements, and overarching policy direction. |
| T8: Regulatory frameworks | Technical guidance, law frameworks, and capacity for climate management. |
| T16: Government official sources | Ministry directives, official decrees, and national references for climate measures. |
| T21: MRV systems | Data collection, national coordination, and reporting platforms. |
| T28: Legislation and directives | Greenhouse‐gas regulations, amendments, and submission processes for member states. |
| T36: System transparency | Target setting, capacity development, and transparent reporting under climate agreements. |
| T37: GHG policy instruments | Verification systems, indirect emissions, and planning methods. |
| G5: Social inclusion | T9: Sustainable resource use | Wetland conservation, waste management, and community livelihoods. |
| T13: Gender and community | Women’s empowerment, youth engagement, and social inclusion in climate initiatives. |
| T22: Youth and sustainability | University research, education programs, and innovation workshops. |
| T24: Public consultation | Human rights, gender equality, and public participation in climate governance. |
| G6: Finance and Carbon market | T14: Carbon and forest economy | Rainforest conservation, carbon markets, and sustainable timber. |
| T15: Climate finance | Concessional loans, funds, and financial commitments |
| T25: Carbon pricing and targets | Domestic target setting, carbon credits, and legally binding obligations for member states. |
| T27: Emission trading | Emission trading, LULUCF, and soil pathways toward climate neutrality. |

**Table S2.** Tweet examples and their stances

| **Sub-topic** | **Tweet examples** |
| --- | --- |
| **Stance Training Dataset** | |
| Believer | RT @Mick_Fanning: Just watched this amazing documentary by leonardodicaprio on climate change. |
| Believer | We must combat climate change. Indigenous ppl are protesting for our earth, our water. Yet this happens: https://t.co/EUDmjbgbkx |
| Denier | @ClimateReality Sorry. I don't believe in climate change. I think it's a big sham to get more tax dollars that should be going elsewhere. |
| Denier | In my opinion, climate change is nothing more than a way 2 remove our money from our pockets 4 their greeny projects. |
| Neutral | RT @CatalyticRxn: Trend is toward increased acceptance of climate change, but acceptance that it's human-caused is flat. |
| Neutral | How do ghosts cool their environment and could we use that to combat global warming? #funny |
| **Our Twitter Dataset** | |
| Believer | A remarkable man and his work on climate change is so impressive more people need to see it... https://t.co/JtpuX9QYFv |
| Believer | We are excited to learn at this event on Thursday 12/16. A discussion of solutions to maritime-related climate change. |
| Denier | Yep. Let's keep the air and water as clean as we can but hard stop with the climate change nonsense. |
| Denier | @pfdoran @think_or_swim @SadhbhO @WeallIreland Environmentalism has been synonymous with sacrifice. That needs to change. |
| Neutral | Was the deadly Kentucky tornado due to climate change? It’s complicated. |
| Neutral | With Global Warming imminent, I hope 2022 ushers in tank tops and shorts as appropriate office attire. |
